# Supplementary material for: Direct enantioselective vinylogous aldol–cyclization cascade reaction of allyl pyrazoleamides with isatins: asymmetric construction of spirocyclic oxindole–dihydropyranones
Source: Royal Society of Chemistry journal article supplement (doi:10.1039/c4cc04235b), 2014-07-07
Supplement: c4cc04235b1.pdf [file c4cc04235b1.pdf]

# Supporting Information

## Direct Enantioselective Vinylogous Aldol/Cyclization Cascade Reaction of Allyl Pyrazoleamides with Isatins: Asymmetric Construction of Spirocyclic Oxindole– Dihydropyranones

Tian-Ze Li, Yu Jiang, Yu-Qing Guan, Feng Sha\*, and Xin-Yan Wu\*

*Key Laboratory for Advanced Materials and Institute of Fine Chemicals, East China  
University of Science and Technology, 130 Meilong Road, Shanghai 200237, P. R. China*

[xinyanwu@ecust.edu.cn](mailto:xinyanwu@ecust.edu.cn)

### Table of Contents

|                                                                                          |     |
|------------------------------------------------------------------------------------------|-----|
| 1. General Information.....                                                              | S2  |
| 2. General Procedure for the Cascade Reaction and Characterization of the Products ..... | S2  |
| 3. Control Reaction of $\alpha,\beta$ -Unsaturated Pyrazoleamide 1a' with 2d .....       | S11 |
| 4. Preparation and Characterization of the Substrates .....                              | S11 |
| 5. References.....                                                                       | S14 |
| 6. Copies of NMR Spectra of the Products.....                                            | S15 |
| 7. Copies of NMR Spectra of the the Substrates.....                                      | S38 |
| 8. Copies of HPLC Spectra of the Products.....                                           | S47 |

## 1. General Information

Melting points were taken without correction.  $^1\text{H}$  NMR and  $^{13}\text{C}$  NMR spectra were recorded on Bruker 400 spectrometer and the chemical shifts were referenced to tetramethylsilane ( $\delta$  0.00 ppm) using  $d_6$ -DMSO or  $\text{CDCl}_3$  as solvent. IR spectra were recorded on Nicolet Magna-I 550 spectrometer. High resolution mass spectra (HRMS) were performed on an electron spray ionization time-of-flight (ESI-TOF) mass spectrometer. Optical rotations were measured on a WZZ-2A digital polarimeter at the wavelength of the sodium D-line (589 nm). HPLC analysis was performed on Waters equipment using Daicel Chiralpak AD-H, Chiralcel OD-H Chiralpak or AS-H column column.

Toluene, THF, and ether were freshly distilled from sodium-benzophenone. Ethyl acetate,  $\text{CH}_2\text{Cl}_2$ , DMF, and  $\text{CH}_3\text{CN}$  were freshly distilled from  $\text{CaH}_2$ . Thin-layer chromatography (TLC) was performed on 10-40  $\mu\text{m}$  silica gel plates. Column chromatography was performed, using silica gel (300-400 mesh) eluted with ethyl acetate and  $\text{CH}_2\text{Cl}_2$ .

Catalysts **A1-A3**,<sup>1</sup> **A4**,<sup>2</sup> **A5-A7**<sup>3</sup> and **A8**<sup>4</sup> were prepared according to literature procedures.

## 2. General Procedure for the Cascade Reaction and Characterization of the Products

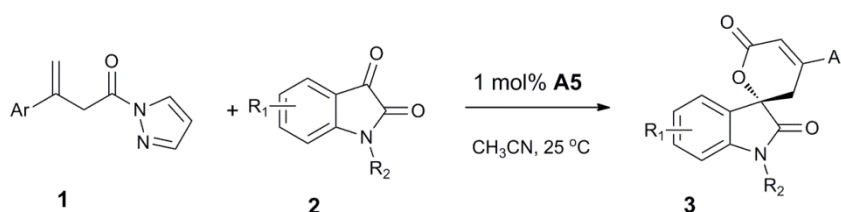

To a solution of catalyst **A5** (0.002 mmol, 0.8 mg) and allyl pyrazoleamide **1** (0.3 mmol) in 2 mL of  $\text{CH}_3\text{CN}$  was added isatin derivative **2** (0.2 mmol) at  $25\text{ }^\circ\text{C}$ , and the resulting mixture was stirred at this temperature until the reaction completed (monitored by TLC). The solvent was removed under reduced pressure and the residue was purified by column chromatography (20/1  $\text{CH}_2\text{Cl}_2$ /ethyl acetate) to give the desired product **3**.

**(S)-1-methyl-4'-phenylspiro[indoline-3,2'-pyran]-2,6'(3'H)-dione (3aa)**. Yield: 99% (60.5 mg), white solid, mp  $192.2\text{-}193.2\text{ }^\circ\text{C}$ , 91% ee,  $[\alpha]_{\text{D}}^{20} +50.2$  ( $c$  0.48,  $\text{CH}_3\text{CN}$ );  $^1\text{H}$  NMR (400 MHz,  $\text{CDCl}_3$ ):  $\delta$  7.54-7.52 (m, 2H), 7.47-7.41 (m, 4H), 7.37

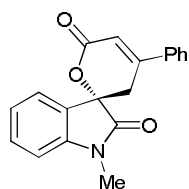

(td,  $J = 8.0$  Hz, 1.2 Hz, 1H), 7.04 (td,  $J = 7.6$  Hz, 0.8 Hz, 1H), 6.87 (d,  $J = 7.6$  Hz, 1H), 6.57 (s, 1H), 3.34 (dd,  $J = 18.0$  Hz, 1.6 Hz, 1H), 3.20 (s, 3H), 3.09 (dd,  $J = 18.0$  Hz, 1.2 Hz, 1H); HPLC analysis (Daicel Chiralcel OD-H column, *n*-Hexane/*i*-PrOH = 65:35, 0.9 mL/min,  $\lambda = 254$  nm):  $t_R = 27.5$  min (minor), 31.2 min (major).

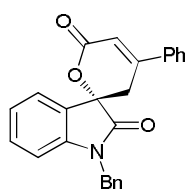

**(S)-1-benzyl-4'-phenylspiro[indoline-3,2'-pyran]-2,6'(3'H)-dione (3ab).** Yield: 98 % (74.6 mg), white solid, mp 185.9-186.3 °C, 91% ee,  $[\alpha]_D^{20} +36.4$  ( $c$  0.58, CH<sub>3</sub>CN); <sup>1</sup>H NMR (400 MHz, *d*<sub>6</sub>-DMSO):  $\delta$  7.81 (d,  $J = 7.6$  Hz, 2H), 7.63 (d,  $J = 7.2$  Hz, 1H), 7.52-7.47 (m, 3H), 7.38-7.28 (m, 6H), 7.09 (t,  $J = 7.2$  Hz, 1H), 7.01 (d,  $J = 8.0$  Hz, 1H), 6.73 (s, 1H), 4.36 (d,  $J = 16.0$  Hz, 1H), 4.89 (d,  $J = 16.0$  Hz, 1H), 3.53 (d,  $J = 18.4$  Hz, 1H), 3.42 (d,  $J = 18.4$  Hz, 1H); <sup>13</sup>C NMR (100 MHz, *d*<sub>6</sub>-DMSO):  $\delta$  172.7, 163.2, 152.2, 142.2, 135.7, 135.4, 131.0, 130.9, 128.9, 128.8, 127.6, 127.5, 127.2, 126.6, 124.4, 123.3, 113.6, 110.1, 79.7, 42.9, 31.1; IR (KBr, cm<sup>-1</sup>):  $\nu$  2922, 1724, 1620, 1496, 1361, 1257, 1075, 696; HRMS calcd for C<sub>25</sub>H<sub>20</sub>NO<sub>3</sub>[M+H]: 382.1443, found 382.1439; HPLC analysis (Daicel Chiralcel OD-H column, *n*-Hexane/*i*-PrOH = 65:35, 0.9 mL/min,  $\lambda = 254$  nm):  $t_R = 19.2$  min (minor), 23.6 min (major).

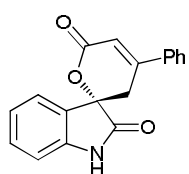

**(S)-4'-phenylspiro[indoline-3,2'-pyran]-2,6'(3'H)-dione (3ad).** Yield: 98% (57.2 mg), white solid, mp 125.3-126.4 °C, 94% ee,  $[\alpha]_D^{20} +50.1$  ( $c$  0.40, CH<sub>3</sub>CN); <sup>1</sup>H NMR (400 MHz, *d*<sub>6</sub>-DMSO):  $\delta$  10.80 (s, 1H), 7.77 (d,  $J = 8.0$  Hz, 2H), 7.54-7.44 (m, 4H), 7.34 (t,  $J = 8.0$  Hz, 1H), 7.03 (t,  $J = 7.6$  Hz, 1H), 6.94 (d,  $J = 7.6$  Hz, 1H), 6.67 (s, 1H), 3.41 (d,  $J = 18.4$  Hz, 1H), 3.31 (d,  $J = 18.4$  Hz, 1H); <sup>13</sup>C NMR (100 MHz, *d*<sub>6</sub>-DMSO):  $\delta$  174.2, 163.4, 152.0, 141.8, 135.5, 131.0, 130.9, 128.9, 128.1, 126.6, 124.5, 122.5, 113.7, 110.5, 80.0, 31.1; IR (KBr, cm<sup>-1</sup>):  $\nu$  3270, 1724, 1620, 1472, 1262, 1121, 1054, 759; HRMS calcd for C<sub>18</sub>H<sub>14</sub>NO<sub>3</sub>[M+H]: 292.0974, found 292.0966; HPLC analysis (Daicel Chiralpak AD-H column, *n*-Hexane/*i*-PrOH = 80:20, 0.9 mL/min,  $\lambda = 254$  nm):  $t_R = 32.1$  min (minor), 34.9 min (major).

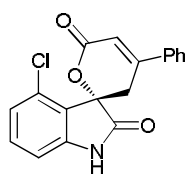

**(S)-4-chloro-4'-phenylspiro[indoline-3,2'-pyran]-2,6'(3'H)-dione (3ae).** Yield: 98% (63.7 mg), white solid, mp 203.9-204.0 °C, 88% ee,  $[\alpha]_D^{20} +102.7$  ( $c$  0.49, CH<sub>3</sub>CN); <sup>1</sup>H NMR (400 MHz, *d*<sub>6</sub>-DMSO):  $\delta$  10.91 (s, 1H), 7.76 (d,  $J = 6.0$  Hz, 2H), 7.65 (d,  $J = 1.2$  Hz, 1H),

7.48-7.40 (m, 4H), 6.95 (d,  $J = 8.4$  Hz, 1H), 6.67 (s, 1H), 3.50 (d,  $J = 18.4$  Hz, 1H), 3.33 (d,  $J = 18.4$  Hz, 1H);  $^{13}\text{C}$  NMR (100 MHz,  $d_6$ -DMSO):  $\delta$  174.0, 163.1, 151.8, 140.8, 135.4, 130.9, 130.8, 129.9, 129.0, 126.6, 126.4, 124.9, 113.5, 112.1, 79.8, 30.7; IR (KBr,  $\text{cm}^{-1}$ ):  $\nu$  3266, 1724, 1621, 1475, 1262, 1078, 767, 610; HRMS calcd for  $\text{C}_{18}\text{H}_{11}\text{ClNO}_3[\text{M}-\text{H}]$ : 324.0433, found 324.0425; HPLC analysis (Daicel Chiralpak AS-H column,  $n$ -Hexane/EtOH = 60:40, 0.9 mL/min,  $\lambda = 254$  nm):  $t_{\text{R}} = 18.1$  min (major), 27.6 min (minor).

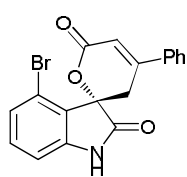

**(S)-4-bromo-4'-phenylspiro[indoline-3,2'-pyran]-2,6'(3'H)-dione**

**(3af)**. Yield: 98% (72.4 mg), white solid, mp 222.3-222.9 °C, 84% ee,  $[\alpha]_{\text{D}}^{20} +45.9$  ( $c$  0.61,  $\text{CH}_3\text{CN}$ );  $^1\text{H}$  NMR (400 MHz,  $d_6$ -DMSO):  $\delta$  10.94 (s, 1H), 7.76 (d,  $J = 6.8$  Hz, 2H), 7.50-7.46 (m, 4H), 7.23 (d,  $J =$

8.0 Hz, 1H), 7.08 (s, 1H), 6.66 (s, 1H), 3.44 (d,  $J = 18.4$  Hz, 1H), 3.33 (d,  $J = 18.4$  Hz, 1H);  $^{13}\text{C}$  NMR (100 MHz,  $d_6$ -DMSO):  $\delta$  174.0, 163.1, 152.0, 143.5, 135.4, 130.9, 128.9, 127.4, 126.6, 126.4, 125.1, 123.7, 113.6, 113.4, 79.6, 30.7; IR (KBr,  $\text{cm}^{-1}$ ):  $\nu$  3265, 1720, 1614, 1449, 1261, 1105, 769; HRMS calcd for  $\text{C}_{18}\text{H}_{11}\text{BrNO}_3[\text{M}-\text{H}]$ : 367.9928, found 367.9930; HPLC analysis (Daicel Chiralpak AS-H column,  $n$ -Hexane/EtOH = 60:40, 0.9 mL/min,  $\lambda = 254$  nm):  $t_{\text{R}} = 9.4$  min (major), 12.4 min (minor).

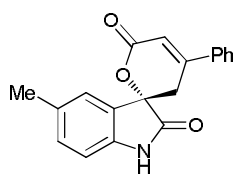

**(S)-5-methyl-4'-phenylspiro[indoline-3,2'-pyran]-2,6'(3'H)-dione**

**(3ag)**. Yield: 98% (60.4 mg), white solid, mp 230.9-231.6 °C, 97% ee,  $[\alpha]_{\text{D}}^{20} +90.0$  ( $c$  0.45,  $\text{CH}_3\text{CN}$ );  $^1\text{H}$  NMR (400 MHz,  $d_6$ -DMSO):  $\delta$  10.68 (s, 1H), 7.79-7.77 (m, 2H), 7.50-7.44 (m, 3H),

7.35 (s, 1H), 7.15 (d,  $J = 7.6$  Hz, 1H), 6.82 (d,  $J = 8.0$  Hz, 1H), 6.66 (s, 1H), 3.38 (d,  $J = 18.4$  Hz, 1H), 3.28 (d,  $J = 18.4$  Hz, 1H), 2.24 (s, 3H);  $^{13}\text{C}$  NMR (100 MHz,  $d_6$ -DMSO):  $\delta$  174.2, 163.4, 151.9, 139.2, 135.5, 131.5, 131.1, 130.8, 128.9, 128.2, 126.6, 125.0, 113.6, 110.3, 80.0, 31.1, 20.6; IR (KBr,  $\text{cm}^{-1}$ ):  $\nu$  3278, 1720, 1626, 1494, 1262, 1157, 1051, 768, 687; HRMS calcd for  $\text{C}_{19}\text{H}_{14}\text{NO}_3[\text{M}-\text{H}]$ : 304.0979, found 304.0962; HPLC analysis (Daicel Chiralpak AS-H column,  $n$ -Hexane/EtOH = 60:40, 0.9 mL/min,  $\lambda = 254$  nm):  $t_{\text{R}} = 25.7$  min (major), 36.8 min (minor).

**(S)-5-methoxy-4'-phenylspiro[indoline-3,2'-pyran]-2,6'(3'H)-dione (3ah)**. Yield: 97% (62.1 mg), white solid, mp 213.6-213.9 °C, 92% ee,  $[\alpha]_{\text{D}}^{20} +96.0$  ( $c$  0.52,  $\text{CH}_3\text{CN}$ );  $^1\text{H}$  NMR (400 MHz,  $d_6$ -DMSO):  $\delta$  10.59 (s, 1H), 7.78-7.76 (m, 2H),

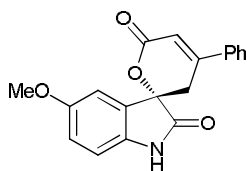

7.50-7.44 (m, 3H), 7.21 (d,  $J = 2.0$  Hz, 1H), 6.92 (dd,  $J = 8.4$  Hz,  $J = 2.0$  Hz, 1H), 6.85 (d,  $J = 8.4$  Hz, 1H), 6.65 (s, 1H), 3.71 (s, 3H), 3.45 (d,  $J = 18.4$  Hz, 1H), 3.28 (d,  $J = 18.4$  Hz, 1H);  $^{13}\text{C}$  NMR (100 MHz,  $d_6$ -DMSO):  $\delta$  174.3, 163.4, 155.3, 151.8, 135.5, 134.8, 130.8, 129.1, 128.9, 126.6, 115.6, 113.6, 111.5, 111.1, 80.3, 55.6, 31.1; IR (KBr,  $\text{cm}^{-1}$ ):  $\nu$  3265, 1721, 1490, 1264, 1204, 1054, 870, 768; HRMS calcd for  $\text{C}_{19}\text{H}_{14}\text{NO}_4[\text{M}-\text{H}]$ : 320.0928, found 320.0925; HPLC analysis (Daicel Chiralpak AD-H column,  $n$ -Hexane/ $i$ -PrOH = 80:20, 0.9 mL/min,  $\lambda = 254$  nm):  $t_{\text{R}} = 35.1$  min (minor), 55.2 min (major).

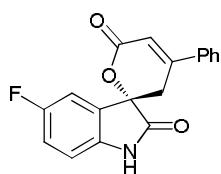

**(S)-5-fluoro-4'-phenylspiro[indoline-3,2'-pyran]-2,6'(3'H)-dione (3ai).** Yield: 99% (61.3 mg), white solid, mp 232.7-233.6 °C, 90% ee,  $[\alpha]_{\text{D}}^{20} +31.6$  ( $c$  0.44,  $\text{CH}_3\text{CN}$ );  $^1\text{H}$  NMR (400 MHz,  $d_6$ -DMSO):  $\delta$  10.80 (s, 1H), 7.79-7.77 (m, 2H), 7.51-7.45 (m, 4H), 7.20 (td,  $J = 8.8$  Hz,  $J = 2.4$  Hz, 1H), 6.95-6.92 (m, 1H), 6.66 (s, 1H), 3.47 (d,  $J = 18.4$  Hz, 1H), 3.33 (d,  $J = 18.4$  Hz, 1H);  $^{13}\text{C}$  NMR (100 MHz,  $d_6$ -DMSO):  $\delta$  174.3, 163.2, 158.2 (d,  $J = 236.9$  Hz), 151.7, 138.0, 135.4, 130.9, 129.5 (d,  $J = 8.1$  Hz), 128.9, 126.6, 117.4 (d,  $J = 23.2$  Hz), 113.6, 112.6 (d,  $J = 25.1$  Hz), 111.5 (d,  $J = 7.9$  Hz), 80.0, 30.8; IR (KBr,  $\text{cm}^{-1}$ ):  $\nu$  3269, 1724, 1627, 1488, 1262, 1189, 1051, 767, 687; HRMS calcd for  $\text{C}_{18}\text{H}_{11}\text{FNO}_3[\text{M}-\text{H}]$ : 308.0728, found 308.0719; HPLC analysis (Daicel Chiralpak AS-H column,  $n$ -Hexane/EtOH = 60:40, 0.9 mL/min,  $\lambda = 254$  nm):  $t_{\text{R}} = 15.2$  min (major), 30.7 min (minor).

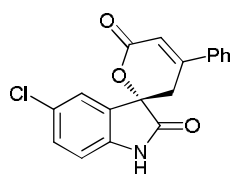

**(S)-5-chloro-4'-phenylspiro[indoline-3,2'-pyran]-2,6'(3'H)-dione (3aj).** Yield: 98% (63.7 mg), white solid, mp 203.9-204.0 °C, 86% ee,  $[\alpha]_{\text{D}}^{20} +102.7$  ( $c$  0.49,  $\text{CH}_3\text{CN}$ );  $^1\text{H}$  NMR (400 MHz,  $d_6$ -DMSO):  $\delta$  10.91 (s, 1H), 7.76 (d,  $J = 6.0$  Hz, 2H), 7.65 (d,  $J = 1.2$  Hz, 1H), 7.48-7.40 (m, 4H), 6.95 (d,  $J = 8.4$  Hz, 1H), 6.67 (s, 1H), 3.50 (d,  $J = 18.4$  Hz, 1H), 3.33 (d,  $J = 18.4$  Hz, 1H);  $^{13}\text{C}$  NMR (100 MHz,  $d_6$ -DMSO):  $\delta$  174.0, 163.1, 151.8, 140.8, 135.4, 130.9, 130.8, 129.9, 129.0, 126.6, 126.4, 124.9, 113.5, 112.1, 79.8, 30.7; IR (KBr,  $\text{cm}^{-1}$ ):  $\nu$  3266, 1724, 1621, 1475, 1262, 1078, 767, 610; HRMS calcd for  $\text{C}_{18}\text{H}_{11}\text{ClNO}_3[\text{M}-\text{H}]$ : 324.0433, found 324.425; HPLC analysis (Daicel Chiralpak AS-H column,  $n$ -Hexane/EtOH = 60:40, 0.9 mL/min,  $\lambda = 254$  nm):  $t_{\text{R}} = 18.1$  min (major), 27.6 min (minor).

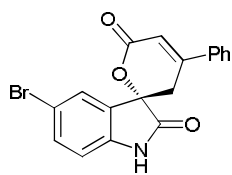

**(S)-5-bromo-4'-phenylspiro[indoline-3,2'-pyran]-2,6'(3'H)-dione (3ak).** Yield: 98% (72.6 mg), white solid, mp 236.5-237.2 °C, 86% ee,  $[\alpha]_D^{20} +101.4$  (*c* 0.60, CH<sub>3</sub>CN); <sup>1</sup>H NMR (400 MHz, *d*<sub>6</sub>-DMSO):  $\delta$  10.91 (s, 1H), 7.79-7.77 (m, 3H), 7.55-7.46 (m, 4H), 6.90 (d, *J* = 8.4 Hz, 1H), 6.66 (s, 1H), 3.51 (d, *J* = 18.4 Hz, 1H), 3.32 (d, *J* = 18.4 Hz, 1H); <sup>13</sup>C NMR (100 MHz, *d*<sub>6</sub>-DMSO):  $\delta$  173.9, 163.1, 151.8, 141.2, 135.4, 133.7, 130.9, 130.2, 128.9, 127.6, 126.6, 114.0, 113.5, 112.6, 79.8, 30.7; IR (KBr, cm<sup>-1</sup>):  $\nu$  3266, 1721, 1618, 1474, 1261, 1048, 766, 607; HRMS calcd for C<sub>18</sub>H<sub>11</sub>BrNO<sub>3</sub>[M-H]: 367.9928, found 367.9920; HPLC analysis (Daicel Chiralpak AS-H column, *n*-Hexane/EtOH = 60:40, 0.9 mL/min,  $\lambda$  = 254 nm): *t*<sub>R</sub> = 24.0 min (major), 29.5 min (minor).

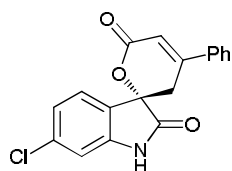

**(S)-6-chloro-4'-phenylspiro[indoline-3,2'-pyran]-2,6'(3'H)-dione (3al).** Yield: 99% (64.3 mg), white solid, mp 236.2-237.1 °C, 92% ee,  $[\alpha]_D^{20} +51.6$  (*c* 0.53, CH<sub>3</sub>CN); <sup>1</sup>H NMR (400 MHz, *d*<sub>6</sub>-DMSO):  $\delta$  10.96 (s, 1H), 7.77-7.75 (m, 2H), 7.55 (d, *J* = 8.0 Hz, 1H), 7.51-7.45 (m, 3H), 7.09 (td, *J* = 8.0 Hz, *J* = 1.6 Hz, 1H), 6.96 (s, 1H), 6.66 (s, 1H), 3.44 (d, *J* = 18.4 Hz, 1H), 3.33 (d, *J* = 18.0 Hz, 1H); <sup>13</sup>C NMR (100 MHz, *d*<sub>6</sub>-DMSO):  $\delta$  174.1, 163.2, 152.0, 143.4, 135.4, 135.3, 130.9, 128.9, 126.9, 126.6, 126.1, 122.2, 113.6, 110.7, 79.5, 30.8; IR (KBr, cm<sup>-1</sup>):  $\nu$  3277, 2922, 1741, 1617, 1448, 1262, 1048, 761; HRMS calcd for C<sub>18</sub>H<sub>11</sub>ClNO<sub>3</sub>[M-H]: 324.0433, found 324.0425; HPLC analysis (Daicel Chiralpak AS-H column, *n*-Hexane/EtOH = 60:40, 0.9 mL/min,  $\lambda$  = 254 nm): *t*<sub>R</sub> = 21.6 min (major), 31.9 min (minor).

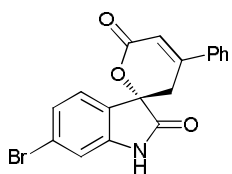

**(S)-6-bromo-4'-phenylspiro[indoline-3,2'-pyran]-2,6'(3'H)-dione (3am).** Yield: 97% (71.6 mg), white solid, mp 231.8-232.9 °C, 92% ee,  $[\alpha]_D^{20} +52.5$  (*c* 0.60, CH<sub>3</sub>CN); <sup>1</sup>H NMR (400 MHz, *d*<sub>6</sub>-DMSO):  $\delta$  10.94 (s, 1H), 7.80 (d, *J* = 6.8 Hz, 2H), 7.52-7.44 (m, 3H), 7.35-7.28 (m, 2H), 6.95 (d, *J* = 7.2 Hz, 1H), 6.65 (d, *J* = 2.0 Hz, 1H), 3.70 (dd, *J* = 18.8 Hz, *J* = 2.0 Hz, 1H), 3.39 (d, *J* = 18.8 Hz, 1H); <sup>13</sup>C NMR (100 MHz, *d*<sub>6</sub>-DMSO):  $\delta$  174.3, 163.2, 150.7, 144.1, 135.1, 132.9, 130.9, 128.9, 126.6, 126.4, 125.2, 119.3, 113.0, 110.0, 80.5, 28.1; IR (KBr, cm<sup>-1</sup>):  $\nu$  3133, 1715, 1613, 1447, 1218, 1055, 768; HRMS calcd for C<sub>18</sub>H<sub>11</sub>BrNO<sub>3</sub>[M-H]: 367.9928, found 367.9912; HPLC analysis (Daicel Chiralpak AS-H column, *n*-Hexane/EtOH = 60:40, 0.9 mL/min,  $\lambda$  = 254 nm): *t*<sub>R</sub> = 20.4 min (major), 29.6 min (minor).

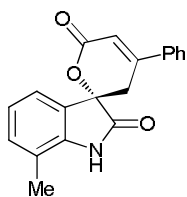

**(S)-7-methyl-4'-phenylspiro[indoline-3,2'-pyran]-2,6'(3'H)-dione**

**(3an).** Yield: 98% (60.0 mg), white solid, mp 271.7-272.7 °C, 94% ee,  $[\alpha]_D^{20} +16.6$  (*c* 0.48, CH<sub>3</sub>CN); <sup>1</sup>H NMR (400 MHz, *d*<sub>6</sub>-DMSO): δ 10.82 (s, 1H), 7.78-7.76 (m, 2H), 7.49-7.44 (m, 3H), 7.34 (d, *J* = 7.6 Hz, 1H), 7.10 (d, *J* = 7.6 Hz, 1H), 6.94 (t, *J* = 7.6 Hz, 1H), 6.66 (s, 1H), 3.39 (d, *J* = 18.4 Hz, 1H), 3.30 (d, *J* = 18.4 Hz, 1H), 2.23 (s, 3H); <sup>13</sup>C NMR (100 MHz, *d*<sub>6</sub>-DMSO): δ 174.7, 163.4, 152.0, 140.3, 135.5, 132.1, 130.9, 128.9, 127.9, 126.6, 122.5, 121.8, 120.0, 113.6, 80.2, 31.1, 16.3; IR (KBr, cm<sup>-1</sup>): ν 3263, 1727, 1627, 1448, 1261, 1074, 767; HRMS calcd for C<sub>19</sub>H<sub>14</sub>NO<sub>3</sub>[M-H]: 304.0979, found 304.0967; HPLC analysis (Daicel Chiralpak AS-H column, *n*-Hexane/EtOH = 60:40, 0.9 mL/min, λ = 254 nm): *t*<sub>R</sub> = 15.4 min (major), 33.0 min (minor).

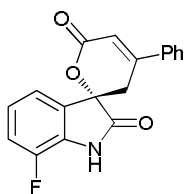

**(S)-7-fluoro-4'-phenylspiro[indoline-3,2'-pyran]-2,6'(3'H)-dione**

**(3ao).** Yield: 98% (60.6 mg), white solid, mp 253.6-255.1 °C, 88% ee,  $[\alpha]_D^{20} +32.9$  (*c* 0.50, CH<sub>3</sub>CN); <sup>1</sup>H NMR (400 MHz, *d*<sub>6</sub>-DMSO): δ 11.34 (s, 1H), 7.79-7.77 (m, 2H), 7.51-7.44 (m, 3H), 7.40 (d, *J* = 7.6 Hz, 1H), 7.30 (d, *J* = 9.2 Hz, 1H), 7.09-7.03 (m, 1H), 6.68 (s, 1H), 3.46 (d, *J* = 18.4 Hz, 1H), 3.37 (d, *J* = 18.4 Hz, 1H); <sup>13</sup>C NMR (100 MHz, *d*<sub>6</sub>-DMSO): δ 174.0, 163.1, 152.1, 146.6 (d, *J* = 242.0 Hz), 135.4, 130.9, 130.9 (d, *J* = 3.6 Hz), 129.1, 128.9, 126.6, 123.6 (d, *J* = 5.7 Hz), 120.6 (d, *J* = 3.0 Hz), 118.0 (d, *J* = 17.9 Hz), 113.5, 79.9 (d, *J* = 3.1 Hz), 30.9; IR (KBr, cm<sup>-1</sup>): ν 3187, 1747, 1693, 1644, 1491, 1207, 1073, 767; HRMS calcd for C<sub>18</sub>H<sub>11</sub>FNO<sub>3</sub>[M-H]: 308.0728, found 308.0730; HPLC analysis (Daicel Chiralpak AS-H column, *n*-Hexane/EtOH = 60:40, 0.9 mL/min, λ = 254 nm): *t*<sub>R</sub> = 14.1 min (major), 35.3 min (minor).

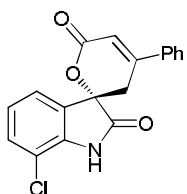

**(S)-7-chloro-4'-phenylspiro[indoline-3,2'-pyran]-2,6'(3'H)-dione**

**(3ap).** Yield: 99% (64.3 mg), white solid, mp 269.5-269.6 °C, 85% ee,  $[\alpha]_D^{20} -30.5$  (*c* 0.53, CH<sub>3</sub>CN); <sup>1</sup>H NMR (400 MHz, *d*<sub>6</sub>-DMSO): δ 11.25 (s, 1H), 7.79-7.77 (m, 2H), 7.53-7.43 (m, 5H), 7.07 (t, *J* = 8.0 Hz, 1H), 6.67 (s, 1H), 3.47 (d, *J* = 18.4 Hz, 1H), 3.38 (d, *J* = 18.4 Hz, 1H); <sup>13</sup>C NMR (100 MHz, *d*<sub>6</sub>-DMSO): δ 174.2, 163.1, 152.0, 139.6, 135.4, 130.9, 130.9, 129.9, 128.9, 126.7, 123.9, 123.3, 114.7, 113.5, 80.3, 30.8; IR (KBr, cm<sup>-1</sup>): ν 3178, 2970, 1746, 1691, 1620, 1382, 1276, 1058, 765; HRMS calcd for C<sub>18</sub>H<sub>11</sub>ClNO<sub>3</sub>[M-H]: 324.0433, found 324.0420; HPLC analysis (Daicel Chiralpak AS-H column, *n*-Hexane/EtOH =

60:40, 0.9 mL/min,  $\lambda = 254$  nm):  $t_R = 15.2$  min (major), 45.2 min (minor).

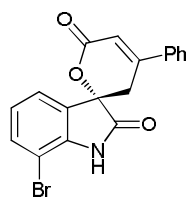

**(S)-7-bromo-4'-phenylspiro[indoline-3,2'-pyran]-2,6'(3'H)-dione**

**(3aq).** Yield: 99% (73.2 mg), white solid, mp 271.5-273.2 °C, 82% ee,

$[\alpha]_D^{20} -14.2$  ( $c$  0.56, CH<sub>3</sub>CN); <sup>1</sup>H NMR (400 MHz, *d*<sub>6</sub>-DMSO):  $\delta$  11.11 (s, 1H), 7.79-7.77 (m, 2H), 7.57-7.44 (m, 5H), 7.00 (t,  $J = 8.0$

Hz, 1H), 6.67 (s, 1H), 3.47 (d,  $J = 18.4$  Hz, 1H), 3.38 (d,  $J = 18.4$  Hz, 1H); <sup>13</sup>C NMR (100 MHz, *d*<sub>6</sub>-DMSO):  $\delta$  174.1, 163.1, 152.0, 141.3, 135.4, 133.8, 130.9, 129.8, 128.9, 126.7, 124.2, 123.7, 113.5, 102.8, 80.6, 30.8; IR (KBr, cm<sup>-1</sup>):  $\nu$  3221, 2970, 1736, 1701, 1618, 1383, 1261, 1056, 767; HRMS calcd for C<sub>18</sub>H<sub>11</sub>BrNO<sub>3</sub>[M-H]: 367.9928, found 367.9917; HPLC analysis (Daicel Chiralpak AS-H column, *n*-Hexane/EtOH = 60:40, 0.9 mL/min,  $\lambda = 254$  nm):  $t_R = 17.1$  min (major), 52.7 min (minor).

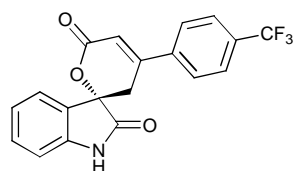

**(S)-4'-(4-(trifluoromethyl)phenyl)spiro[indoline-3,2'-pyran]-2,6'(3'H)-dione (3bd).** Yield: 98% (70.0 mg), white solid, mp 248.8-250.3 °C, 95% ee,  $[\alpha]_D^{20} +56.5$  ( $c$  0.58,

CH<sub>3</sub>CN); <sup>1</sup>H NMR (400 MHz, *d*<sub>6</sub>-DMSO):  $\delta$  10.80 (s, 1H), 7.99 (d,  $J = 8.0$  Hz, 2H), 7.81 (d,  $J = 8.0$  Hz, 2H), 7.55 (d,  $J = 7.6$  Hz, 1H), 7.35 (t,  $J = 7.6$  Hz, 1H), 7.04 (t,  $J = 7.6$  Hz, 1H), 6.93 (d,  $J = 8.0$  Hz, 1H), 6.78 (s, 1H), 3.48 (d,  $J = 18.0$  Hz, 1H), 3.36 (d,  $J = 18.0$  Hz, 1H); <sup>13</sup>C NMR (100 MHz, *d*<sub>6</sub>-DMSO):  $\delta$  174.1,

163.1, 150.5, 141.8, 139.6, 131.1, 130.4 (q,  $J = 31.9$  Hz), 127.9, 127.5, 125.7, 125.7, 124.6, 122.5, 116.0, 110.6, 80.0, 31.0; IR (KBr, cm<sup>-1</sup>):  $\nu$  3270, 1736, 1620, 1473, 1326, 1121, 1070, 751; HRMS calcd for C<sub>19</sub>H<sub>13</sub>F<sub>3</sub>NO<sub>3</sub>[M+H]: 360.0848, found 360.0822; HPLC analysis (Daicel Chiralpak AS-H column, *n*-Hexane/EtOH = 60:40, 0.9 mL/min,  $\lambda = 254$  nm):  $t_R = 9.8$  min (major), 13.3 min (minor).

**(S)-4'-(4-chlorophenyl)spiro[indoline-3,2'-pyran]-2,6'(3'H)-dione (3cd).** Yield:

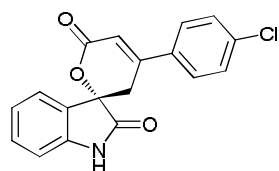

99% (64.2 mg), white solid, mp 242.9-243.7 °C, 93% ee,  $[\alpha]_D^{20} +63.6$  ( $c$  0.52, CH<sub>3</sub>CN); <sup>1</sup>H NMR (400 MHz, *d*<sub>6</sub>-DMSO):  $\delta$  10.77 (s, 1H), 7.81 (d,  $J = 8.4$  Hz, 2H), 7.52 (d,  $J = 8.4$  Hz,

3H), 7.35 (t,  $J = 7.6$  Hz, 1H), 7.03 (t,  $J = 7.6$  Hz, 1H), 6.92 (d,  $J = 7.6$  Hz, 1H), 6.69 (s, 1H), 3.40 (d,  $J = 18.0$  Hz, 1H), 3.26 (d,  $J = 18.4$  Hz, 1H); <sup>13</sup>C NMR (100 MHz, *d*<sub>6</sub>-DMSO):  $\delta$  174.1, 163.3, 150.7, 141.8, 135.6, 134.3, 131.0, 128.9, 128.5, 128.0, 124.6, 122.5, 114.2, 110.5, 79.9, 30.9; IR (KBr, cm<sup>-1</sup>):  $\nu$  3398, 1736, 1619, 1365, 1217, 1093, 770; HRMS calcd for C<sub>18</sub>H<sub>11</sub>ClNNO<sub>3</sub>[M+Na]: 348.0403,



found 348.0413; HPLC analysis (Daicel Chiralpak AS-H column, *n*-Hexane/EtOH = 60:40, 0.9 mL/min,  $\lambda = 254$  nm):  $t_R = 14.9$  min (major), 18.3 min (minor).

**(S)-4'-(4-fluorophenyl)spiro[indoline-3,2'-pyran]-2,6'(3'H)-dione (3dd)** Yield: 99%

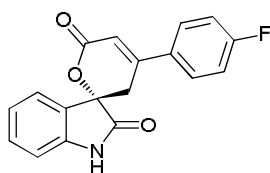

(60.9 mg), white solid, mp 239.6-240.8 °C, 92% ee,  $[\alpha]_D^{20} +49.7$  (*c* 0.48, CH<sub>3</sub>CN); <sup>1</sup>H NMR (400 MHz, *d*<sub>6</sub>-DMSO):  $\delta$  10.78 (s, 1H), 7.88-7.84 (m, 2H), 7.52 (d, *J* = 7.6 Hz, 1H), 7.36-7.28 (m, 3H), 7.02 (t, *J* = 7.6 Hz, 1H), 6.93 (d, *J* = 7.6 Hz, 1H), 6.66 (s, 1H), 3.40 (d, *J* = 18.4 Hz, 1H), 3.31 (d, *J* = 18.4 Hz, 1H); <sup>13</sup>C NMR (100 MHz, *d*<sub>6</sub>-DMSO):  $\delta$  174.2, 163.6 (d, *J* = 247.8), 163.4, 150.9, 141.8, 132.0 (d, *J* = 2.9 Hz), 131.0, 129.2 (d, *J* = 8.7 Hz), 128.1, 124.5, 122.5, 115.9 (d, *J* = 21.6 Hz), 113.6, 110.5, 79.9, 31.1; IR (KBr, cm<sup>-1</sup>):  $\nu$  3268, 1735, 1600, 1473, 1236, 1054, 835, 753; HRMS calcd for C<sub>18</sub>H<sub>13</sub>FNO<sub>3</sub>[M+H]: 310.0879, found 310.0862; HPLC analysis (Daicel Chiralpak AS-H column, *n*-Hexane/EtOH = 80:20, 0.9 mL/min,  $\lambda = 254$  nm):  $t_R = 42.8$  min (major), 49.8 min (minor).

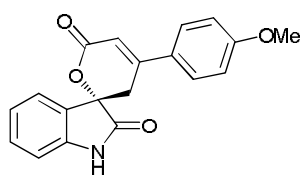

**(S)-4'-(4-methoxyphenyl)spiro[indoline-3,2'-pyran]-2,6'(3'H)-dione (3ed)**. Yield: 93% (59.7 mg), white solid, mp 254.3-255.0 °C, 92% ee,  $[\alpha]_D^{20} +49.7$  (*c* 0.48, CH<sub>3</sub>CN); <sup>1</sup>H NMR (400 MHz, *d*<sub>6</sub>-DMSO):  $\delta$  10.76 (s, 1H), 7.76 (d, *J* = 8.4 Hz, 2H), 7.50 (d, *J* = 7.2 Hz, 1H), 7.34 (t, *J* = 7.6 Hz, 1H), 7.03-6.99 (m, 3H), 6.92 (d, *J* = 7.6 Hz, 1H), 6.58 (s, 1H), 3.80 (s, 3H), 3.35 (d, *J* = 18.4 Hz, 1H), 3.26 (d, *J* = 18.4 Hz, 1H); <sup>13</sup>C NMR (100 MHz, *d*<sub>6</sub>-DMSO):  $\delta$  174.2, 163.6, 161.5, 151.5, 141.8, 130.9, 128.4, 128.3, 127.5, 124.5, 122.5, 114.3, 111.2, 110.5, 79.8, 55.4, 30.9; IR (KBr, cm<sup>-1</sup>):  $\nu$  3266, 1736, 1602, 1515, 1472, 1248, 1183, 1026, 827, 732; HRMS calcd for C<sub>19</sub>H<sub>15</sub>KNO<sub>4</sub>[M+K]: 360.0638, found 360.0622; HPLC analysis (Daicel Chiralpak AS-H column, *n*-Hexane/EtOH = 60:40, 0.9 mL/min,  $\lambda = 254$  nm):  $t_R = 22.1$  min (major), 34.1 min (minor).

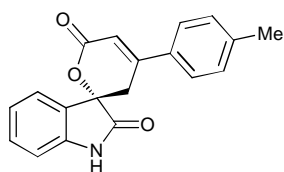

**(S)-4'-(*p*-tolyl)spiro[indoline-3,2'-pyran]-2,6'(3'H)-dione (3fd)**. Yield: 97% (59.1 mg), white solid, mp 233.3-235.1 °C, 93% ee,  $[\alpha]_D^{20} +80.1$  (*c* 0.47, CH<sub>3</sub>CN); <sup>1</sup>H NMR (400 MHz, *d*<sub>6</sub>-DMSO):  $\delta$  10.8 (s, 1H), 7.67 (d, *J* = 2.0 Hz, 2H), 7.51 (d, *J* = 7.2 Hz, 1H), 7.34 (t, *J* = 7.2 Hz, 1H), 7.26 (d, *J* = 8.0 Hz, 2H), 7.01 (t, *J* = 7.2 Hz, 1H), 6.93 (d, *J* = 7.6 Hz, 1H), 6.62 (s, 1H), 3.36 (d, *J* = 18.4 Hz, 1H), 3.26 (d, *J* = 18.4

Hz, 1H), 2.33 (s, 3H);  $^{13}\text{C}$  NMR (100 MHz,  $d_6$ -DMSO):  $\delta$  174.2, 163.5, 151.9, 141.8, 141.0, 132.6, 130.9, 129.5, 128.2, 126.5, 124.5, 122.5, 112.6, 110.5, 79.9, 31.0, 20.9; IR (KBr,  $\text{cm}^{-1}$ ):  $\nu$  3369, 1707, 1618, 1263, 1095, 818, 769; HRMS calcd for  $\text{C}_{19}\text{H}_{15}\text{NNaO}_3[\text{M}+\text{Na}]$ : 328.0950, found 328.0948; HPLC analysis (Daicel Chiralpak AS-H column, *n*-Hexane/EtOH = 60:40, 0.9 mL/min,  $\lambda$  = 254 nm):  $t_{\text{R}}$  = 16.6 min (major), 25.7 min (minor).

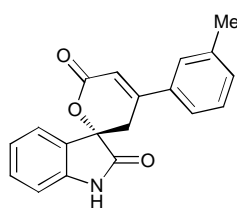

**(S)-4'-(*m*-tolyl)spiro[indoline-3,2'-pyran]-2,6'(3'*H*)-dione (3gd)**

Yield: 98% (60.4 mg), white solid, mp 192.6-193.6 °C, 95% ee,  $[\alpha]_{\text{D}}^{20}$  +40.0 ( $c$  0.47,  $\text{CH}_3\text{CN}$ );  $^1\text{H}$  NMR (400 MHz,  $d_6$ -DMSO):  $\delta$  10.79 (s, 1H), 7.61-7.51 (m, 3H), 7.36-7.26 (m, 3H), 7.03 (t,  $J$  = 7.6 Hz, 1H), 6.94 (d,  $J$  = 7.6 Hz, 1H), 6.66 (s, 1H), 3.39 (d,  $J$  = 17.6 Hz, 1H), 3.39 (d,  $J$  = 17.6 Hz), 2.33 (s, 3H);  $^{13}\text{C}$  NMR (100 MHz,  $d_6$ -DMSO):  $\delta$  174.2, 163.4, 152.1, 141.8, 138.3, 135.4, 131.5, 131.0, 128.8, 128.2, 127.2, 124.5, 123.7, 122.5, 113.4, 110.5, 79.9, 31.2, 20.9; IR (KBr,  $\text{cm}^{-1}$ ):  $\nu$  3274, 1727, 1620, 1473, 1252, 1093, 865, 680; HRMS calcd for  $\text{C}_{19}\text{H}_{15}\text{NNaO}_3[\text{M}+\text{Na}]$ : 328.0950, found 328.0981; HPLC analysis (Daicel Chiralpak AS-H column, *n*-Hexane/EtOH = 60:40, 0.9 mL/min,  $\lambda$  = 254 nm):  $t_{\text{R}}$  = 18.6 min (major), 35.4 min (minor).

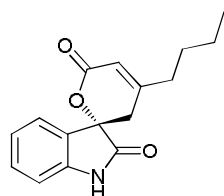

**(S)-4'-butylspiro[indoline-3,2'-pyran]-2,6'(3'*H*)-dione (3hd)**

Yield: 94% (50.9 mg), viscous liquid, 88% ee,  $[\alpha]_{\text{D}}^{20}$  + 15.3 ( $c$  0.39,  $\text{CH}_3\text{CN}$ );  $^1\text{H}$  NMR (400 MHz,  $\text{CDCl}_3$ ):  $\delta$  9.01 (s, 1H), 7.37 (d,  $J$  = 7.6 Hz, 1H), 7.29-7.25 (m, 1H), 7.00 (t,  $J$  = 7.6 Hz, 1H), 6.92 (d,  $J$  = 7.6 Hz, 1H), 6.05 (s, 1H), 2.91 (d,  $J$  = 18.0 Hz, 1H), 2.61 (d,  $J$  = 18.0 Hz, 1H), 2.30 (t,  $J$  = 7.6 Hz, 2H), 1.55-1.47 (m, 2H), 1.41-1.32 (m, 2H), 0.92 (t,  $J$  = 7.2 Hz, 3H);  $^{13}\text{C}$  NMR (100 MHz,  $\text{CDCl}_3$ ):  $\delta$  174.8, 163.1, 158.5, 140.3, 130.9, 128.1, 124.0, 123.2, 115.2, 111.1, 80.2, 36.4, 34.0, 28.1, 22.2, 13.7; IR (KBr,  $\text{cm}^{-1}$ ):  $\nu$  3261, 2959, 1739, 1473, 1246, 1047, 762; HRMS calcd for  $\text{C}_{16}\text{H}_{17}\text{NNaO}_3[\text{M}+\text{Na}]$ : 294.1106, found 294.1104; HPLC analysis (Daicel Chiralpak AS-H column, *n*-Hexane/EtOH = 60:40, 0.9 mL/min,  $\lambda$  = 254 nm):  $t_{\text{R}}$  = 6.65 min (major), 18.1 min (minor).

### 3. Control Reaction of $\alpha,\beta$ -Unsaturated Pyrazoleamide **1a'** with **2d**

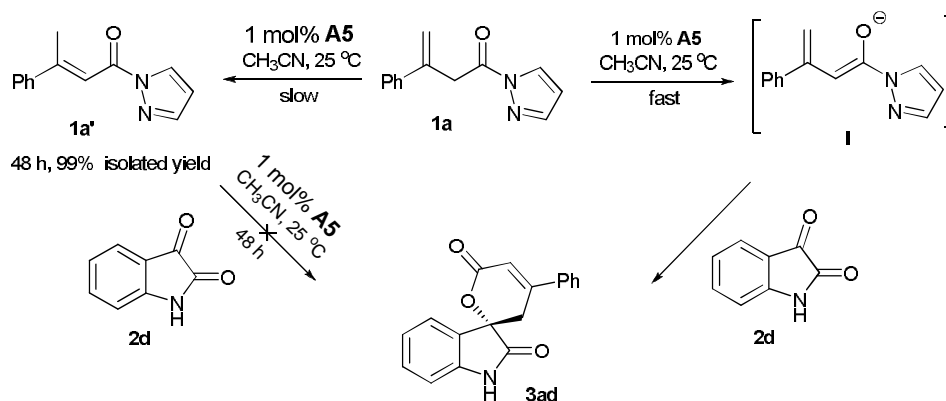

Allyl pyrazoleamide **1a** can be transformed to the corresponding  $\alpha,\beta$ -unsaturated pyrazoleamide isomer **1a'** under the typical reaction condition without the addition of isatin. The results indicated that the isomerization rate of transforming **1a** to **1a'** is much slower than the rate of the tandem reaction between **1a** and isatin. As predicted, **1a'** is an unreactive nucleophile in the vinylogous aldol reaction, probably because it couldn't be deprotonated by the tertiary amine to form the key intermediates **I**.

#### (*E*)-3-phenyl-1-(1*H*-pyrazol-1-yl)but-2-en-1-one(**1a'**).

To a solution of catalyst **A5** (0.02 mmol, 8.4 mg) in 20 mL of  $\text{CH}_3\text{CN}$  was added allyl pyrazoleamide **1a** (0.2 mmol, 0.42 g) at  $25^\circ\text{C}$ , and the resulting mixture was stirred at this temperature for 48 h. The solvent was removed under reduced pressure and the residue was purified by column chromatography (10/1 petroleum ether/ethyl acetate) to give 0.42 g (99%) colorless liquid;  $^1\text{H}$  NMR (400 MHz,  $\text{CDCl}_3$ ):  $\delta$  8.35 (d,  $J = 2.8$  Hz, 1H), 7.70 (s, 1H), 7.61-7.57 (m, 3H), 7.38-7.36 (m, 3H), 6.42-6.41 (m, 1H), 2.71 (s, 3H);  $^{13}\text{C}$  NMR (100 MHz,  $\text{CDCl}_3$ ):  $\delta$  163.0, 160.2, 143.1, 141.9, 129.5, 128.4, 128.2, 126.4, 114.6, 109.2, 18.7; IR (KBr,  $\text{cm}^{-1}$ ):  $\nu$  3164, 1697, 1610, 1382, 1099, 1030, 765, 694; HRMS calcd for  $\text{C}_{13}\text{H}_{12}\text{N}_2\text{NaO}$  [ $\text{M}+\text{Na}$ ]: 235.0847, found 235.0844.

### 4. Preparation and Characterization of the Substrates

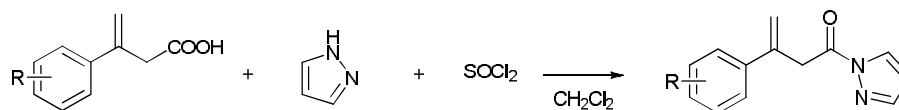

A  $\text{CH}_2\text{Cl}_2$  (5 mL) solution of thionyl chloride (13 mmol) were added dropwise to a mixture of 10 mmol pyrazole, 40 mmol allyl carboxylic acid and 25 mL  $\text{CH}_2\text{Cl}_2$ . The resultant solution was stirred for 2 h at room temperature. After being quenched with 0.1 M HCl solution ( $3 \times 10$  mL), washed with 0.1 M NaOH solution ( $3 \times 10$  mL)

and aq NaCl, the organic phase was separated, dry over anhydrous MgSO<sub>4</sub>, filtered and concentrated under reduced pressure, the crude product was purified by chromatography on silica gel with petroleum ether-ethyl acetate as eluent.

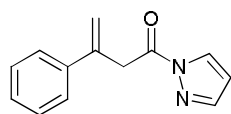

**3-phenyl-1-(1H-pyrazol-1-yl)but-3-en-1-one (1a).** Yield: 85% (1.80 g), colorless liquid; <sup>1</sup>H NMR (400 MHz, CDCl<sub>3</sub>): δ 8.22 (d, *J* = 2.8 Hz, 1H), 7.73 (s, 1H), 7.47 (d, *J* = 7.6 Hz, 2H), 7.33-7.24 (m, 3H), 6.43 (d, *J* = 1.2 Hz, 1H), 5.63 (s, 1H), 5.29 (s, 1H), 4.38 (s, 2H); <sup>13</sup>C NMR (100 MHz, CDCl<sub>3</sub>): δ 169.7, 144.1, 140.3, 139.6, 128.4, 128.4, 127.8, 125.8, 117.0, 109.8, 40.1; IR (KBr, cm<sup>-1</sup>): ν 1736, 1383, 1353, 1200, 1089, 914, 774, 704; HRMS calcd for C<sub>13</sub>H<sub>12</sub>N<sub>2</sub>NaO [M+Na]: 235.0847, found 235.0843.

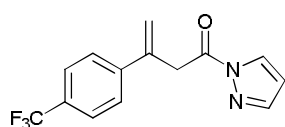

**1-(1H-pyrazol-1-yl)-3-(4-(trifluoromethyl)phenyl)but-3-en-1-one (1b).** Yield: 81% (2.27 g), colorless liquid; <sup>1</sup>H NMR (400 MHz, CDCl<sub>3</sub>): δ 8.22 (d, *J* = 2.8 Hz, 1H), 7.75 (s, 1H), 7.58 (s, 4H), 6.46-6.45 (m, 1H), 5.70 (s, 1H), 5.42 (s, 1H), 4.41 (s, 2H); <sup>13</sup>C NMR (100 MHz, CDCl<sub>3</sub>): δ 169.3, 144.3, 143.3, 139.4, 129.7 (q, *J* = 32.2 Hz), 128.5, 126.2, 125.4 (q, *J* = 3.7 Hz), 122.7, 119.2, 110.0, 30.0; IR (KBr, cm<sup>-1</sup>): ν 3129, 1736, 1619, 1384, 1327, 1121, 915, 764; HRMS calcd for C<sub>14</sub>H<sub>12</sub>F<sub>3</sub>N<sub>2</sub>O [M+H]: 281.0902, found 281.0905.

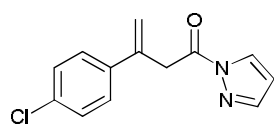

**3-(4-chlorophenyl)-1-(1H-pyrazol-1-yl)but-3-en-1-one (1c).** Yield: 89% (2.20 g), colorless liquid; <sup>1</sup>H NMR (400 MHz, CDCl<sub>3</sub>): δ 8.22 (d, *J* = 2.8 Hz, 1H), 7.74 (s, 1H), 7.40 (d, *J* = 8.8 Hz, 2H), 7.28 (d, *J* = 8.4 Hz, 2H), 6.45-6.44 (m, 1H), 5.61 (s, 1H), 5.31 (s, 1H), 4.35 (s, 2H); <sup>13</sup>C NMR (100 MHz, CDCl<sub>3</sub>): δ 169.4, 144.2, 139.3, 138.1, 133.6, 128.5, 128.4, 127.1, 117.6, 109.9, 40.0; IR (KBr, cm<sup>-1</sup>): ν 1736, 1493, 1383, 1200, 1089, 914, 838, 766; HRMS calcd for C<sub>13</sub>H<sub>11</sub>ClN<sub>2</sub>NaO [M+Na]: 269.0458, found 269.0459.

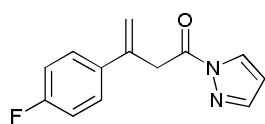

**3-(4-fluorophenyl)-1-(1H-pyrazol-1-yl)but-3-en-1-one (1d).** Yield: 86% (1.98 g), colorless liquid; <sup>1</sup>H NMR (400 MHz, CDCl<sub>3</sub>): δ 8.23 (d, *J* = 2.8 Hz, 1H), 7.74 (s, 1H), 7.46-7.42 (m, 2H), 7.00 (m, 2H), 6.45-6.44 (m, 1H), 5.57 (s, 1H), 5.28 (s, 1H), 4.36 (s, 2H); <sup>13</sup>C NMR (100 MHz, CDCl<sub>3</sub>): δ 169.5, 162.4 (d, *J* = 245.3 Hz), 144.1, 139.4, 135.8 (d, *J* = 3.2 Hz), 128.4, 127.5 (d, *J* = 8.0 Hz), 117.0, 115.2 (d, *J* = 21.3 Hz), 109.9, 40.2; IR (KBr, cm<sup>-1</sup>): ν 1736, 1511, 1383, 1237, 1084, 915, 842, 765; HRMS calcd for C<sub>13</sub>H<sub>11</sub>FN<sub>2</sub>NaO [M+Na]: 253.0753, found 253.0758.

**3-(4-methoxyphenyl)-1-(1H-pyrazol-1-yl)but-3-en-1-one(1e).** Yield: 84% (2.03 g),

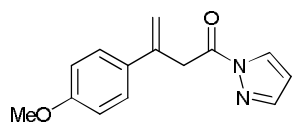

colorless liquid;  $^1\text{H}$  NMR (400 MHz,  $\text{CDCl}_3$ ):  $\delta$  8.23 (s, 1H), 7.74 (s, 1H), 7.41 (d,  $J = 8.0$  Hz, 2H), 6.84 (d,  $J = 8.0$  Hz, 2H), 6.36-6.33 (m, 1H), 5.55 (s, 1H), 5.20 (s, 1H), 4.35 (s, 2H), 3.78 (s, 3H);  $^{13}\text{C}$  NMR (100 MHz,  $\text{CDCl}_3$ ):  $\delta$  169.8, 159.3, 144.0, 139.6, 132.0, 128.4, 126.9, 115.3, 113.7, 109.8, 55.1, 40.1; IR (KBr,  $\text{cm}^{-1}$ ):  $\nu$  2835, 1736, 1608, 1514, 1250, 1032, 914, 765; HRMS calcd for  $\text{C}_{14}\text{H}_{15}\text{N}_2\text{O}_2[\text{M}+\text{H}]$ : 243.1134, found 243.1134.

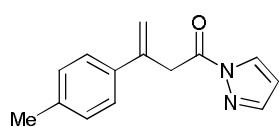

**1-(1H-pyrazol-1-yl)-3-(p-tolyl)but-3-en-1-one (1f).** Yield: 90% (2.04 g), colorless liquid;  $^1\text{H}$  NMR (400 MHz,  $\text{CDCl}_3$ ):  $\delta$  8.23 (d,  $J = 2.8$  Hz, 1H), 7.73 (s, 1H), 7.37 (d,  $J = 8.0$  Hz, 2H), 7.12 (d,  $J = 8.0$  Hz, 2H), 7.43-7.42 (m, 1H), 5.60 (s, 1H), 5.24 (s, 1H), 4.36 (s, 2H), 2.32 (s, 3H);  $^{13}\text{C}$  NMR (100 MHz,  $\text{CDCl}_3$ ):  $\delta$  169.7, 144.0, 140.1, 137.6, 136.7, 129.1, 128.4, 125.6, 116.1, 109.8, 40.1, 21.0; IR (KBr,  $\text{cm}^{-1}$ ):  $\nu$  1736, 1515, 1383, 1088, 915, 832, 608; HRMS calcd for  $\text{C}_{14}\text{H}_{14}\text{N}_2\text{NaO} [\text{M}+\text{Na}]$ : 249.1004, found 249.1004.

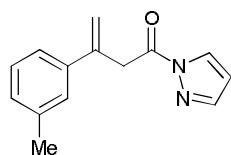

**1-(1H-pyrazol-1-yl)-3-(m-tolyl)but-3-en-1-one (1g).** Yield: 88% (1.99 g), colorless liquid;  $^1\text{H}$  NMR (400 MHz,  $\text{CDCl}_3$ ):  $\delta$  8.23 (d,  $J = 2.8$  Hz, 1H), 7.74 (s, 1H), 7.29-7.13 (m, 3H), 7.08 (d,  $J = 7.2$  Hz, 1H), 8.44-8.43 (m, 1H), 5.61 (s, 1H), 5.26 (s, 1H), 4.37 (s, 2H), 2.33 (s, 3H);  $^{13}\text{C}$  NMR (100 MHz,  $\text{CDCl}_3$ ):  $\delta$  169.7, 144.0, 140.5, 139.7, 137.9, 128.6, 128.4, 128.3, 126.6, 122.9, 116.8, 109.8, 40.2, 21.4; IR (KBr,  $\text{cm}^{-1}$ ):  $\nu$  1736, 1383, 1352, 1120, 1088, 916, 769, 723; HRMS calcd for  $\text{C}_{14}\text{H}_{14}\text{N}_2\text{NaO} [\text{M}+\text{Na}]$ : 249.1004, found 249.1003.

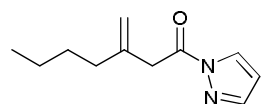

**3-methylene-1-(1H-pyrazol-1-yl)heptan-1-one (1h).** Yield: 90% (1.28 g), colorless liquid,  $^1\text{H}$  NMR (400 MHz,  $\text{CDCl}_3$ ):  $\delta$  8.22 (s, 1H), 7.66 (s, 1H), 6.39 (s, 1H), 4.95 (s, 1H), 4.90 (s, 1H), 3.82 (s, 2H), 2.12 (t,  $J = 7.6$  Hz, 2H), 1.46-1.38 (m, 2H), 1.33-1.24 (m, 2H), 0.86 (t,  $J = 7.2$  Hz, 3H);  $^{13}\text{C}$  NMR (100 MHz,  $\text{CDCl}_3$ ):  $\delta$  169.9, 143.8, 142.0, 128.2, 114.0, 109.6, 40.6, 35.7, 29.4, 22.1, 13.8; IR (KBr,  $\text{cm}^{-1}$ ):  $\nu$  2958, 1739, 1383, 1200, 1088, 919, 768; HRMS calcd for  $\text{C}_{11}\text{H}_{17}\text{N}_2\text{O} [\text{M}+\text{H}]$ : 193.1341, found 193.1346.

## 5. References

1. (a) B. Vakulya, S. Varga, A. Csámpai and T. Soós, *Org. Lett.*, 2005, **7**, 1967-1969; (b) M. Shi, Z.-Y. Lei, M.-X. Zhao and J.-W. Shi, *Tetrahedron Lett.*, 2007, **48**, 5743-5746; (c) W. Yang and D.-M. Du, *Org. Lett.*, 2010, **12**, 5450-5453.
2. T.-Y. Liu, J. Long, B.-J. Li, L. Jiang, R. Li, Y. Wu, L.-S. Ding and Y.-C. Chen, *Org. Biomol. Chem.*, 2006, **4**, 2097-2099.
3. (a) T. Okino, Y. Hoashi, T. Furukawa, X. Xu and Y. Takemoto, *J. Am. Chem. Soc.*, 2004, **127**, 119-125; (b) Y. Wang, Y. Xing, X. Liu, H. Ji, M. Kai, Z. Chen, J. Yu, D. Zhao, H. Ren and R. Wang, *J. Med. Chem.*, 2012, **55**, 6224-6236; (c) S.-Z. Nie, Z.-P. Hu, Y.-N. Xuan, J.-J. Wang, X.-M. Li and M. Yan, *Tetrahedron: Asymmetry*, 2010, **21**, 2055-2059.
4. W. Yang and D.-M. Du, *Adv. Synth. Catal.*, 2011, **353**, 1241-1246.

## 6. Copies of NMR Spectra of the Products

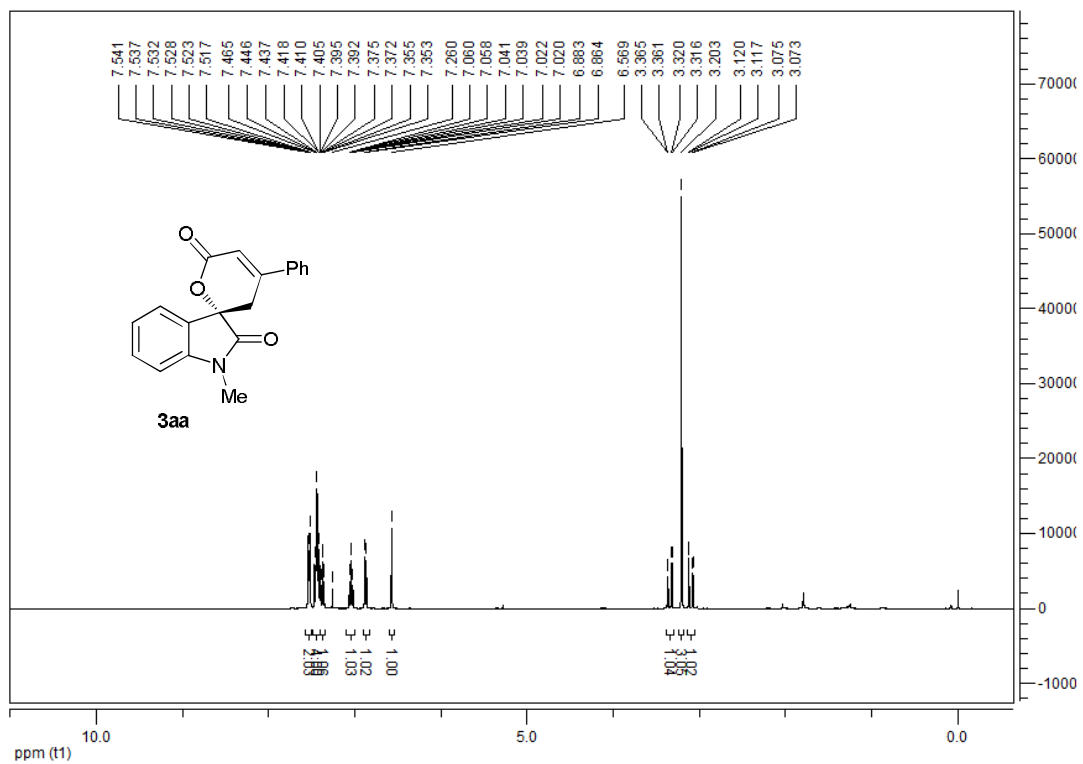

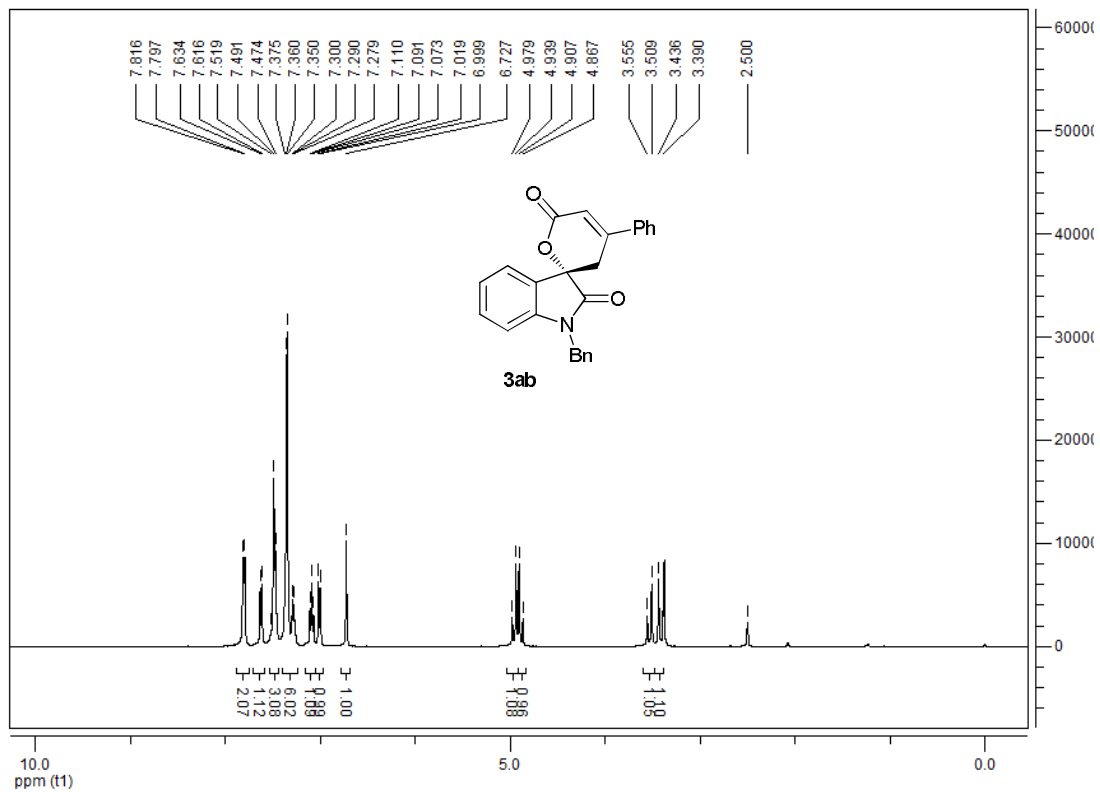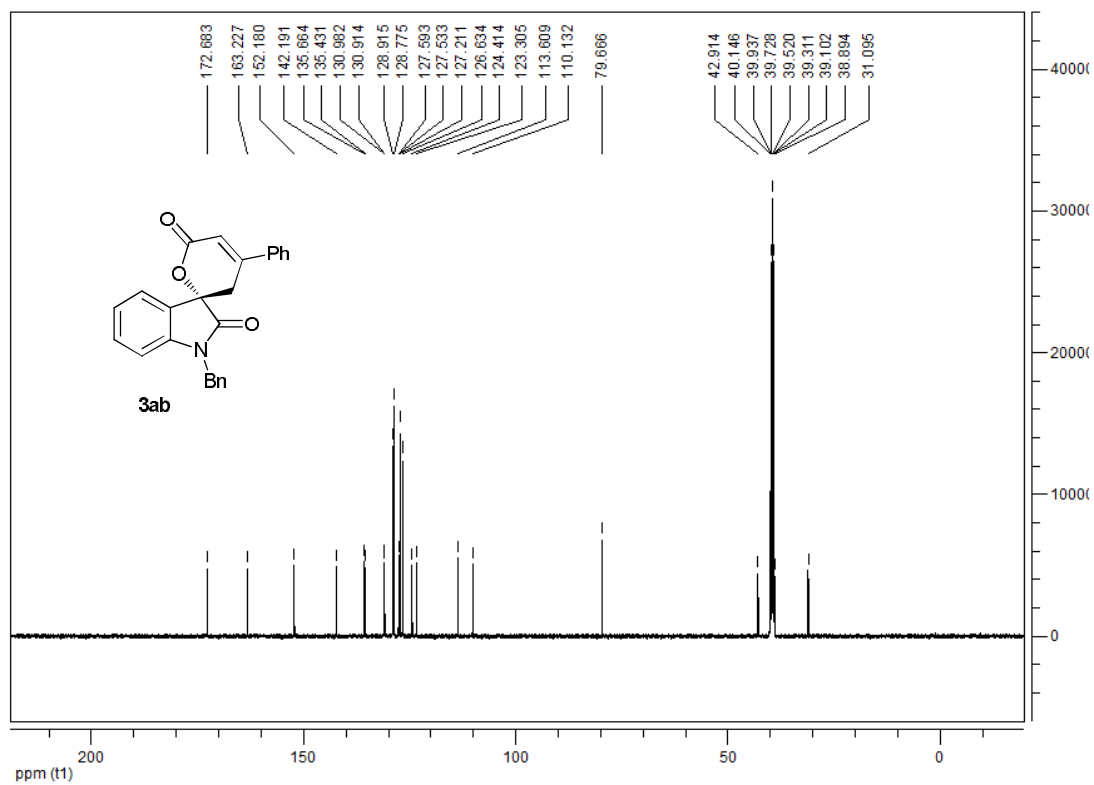



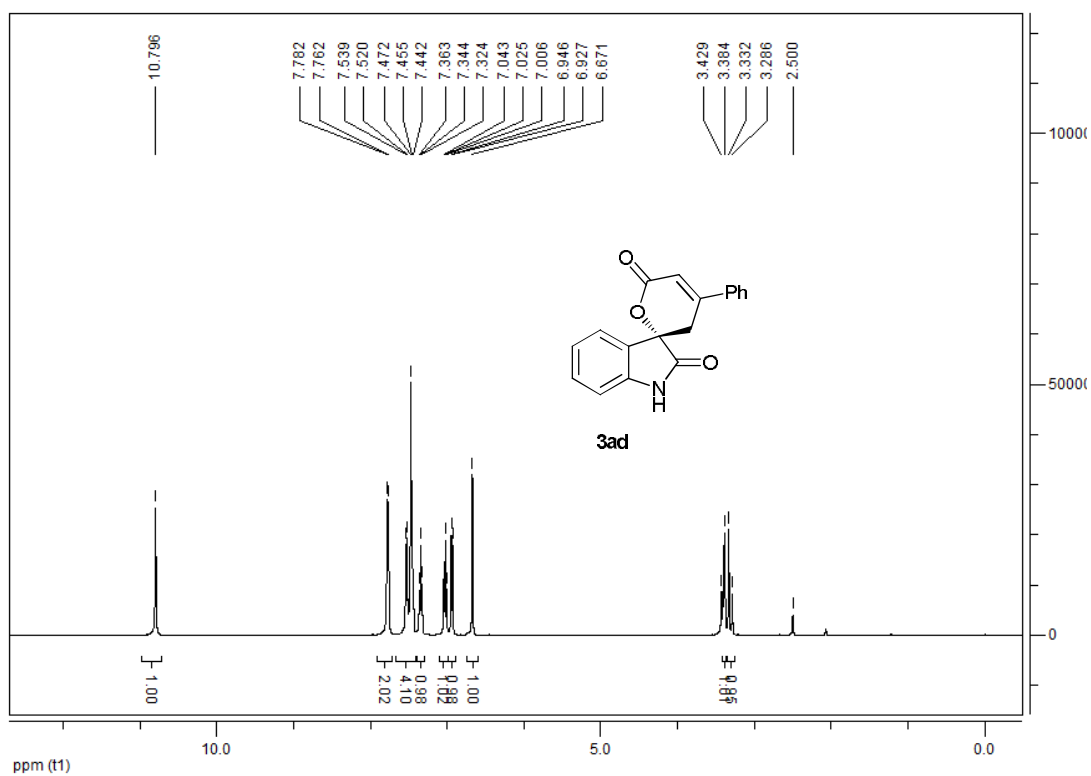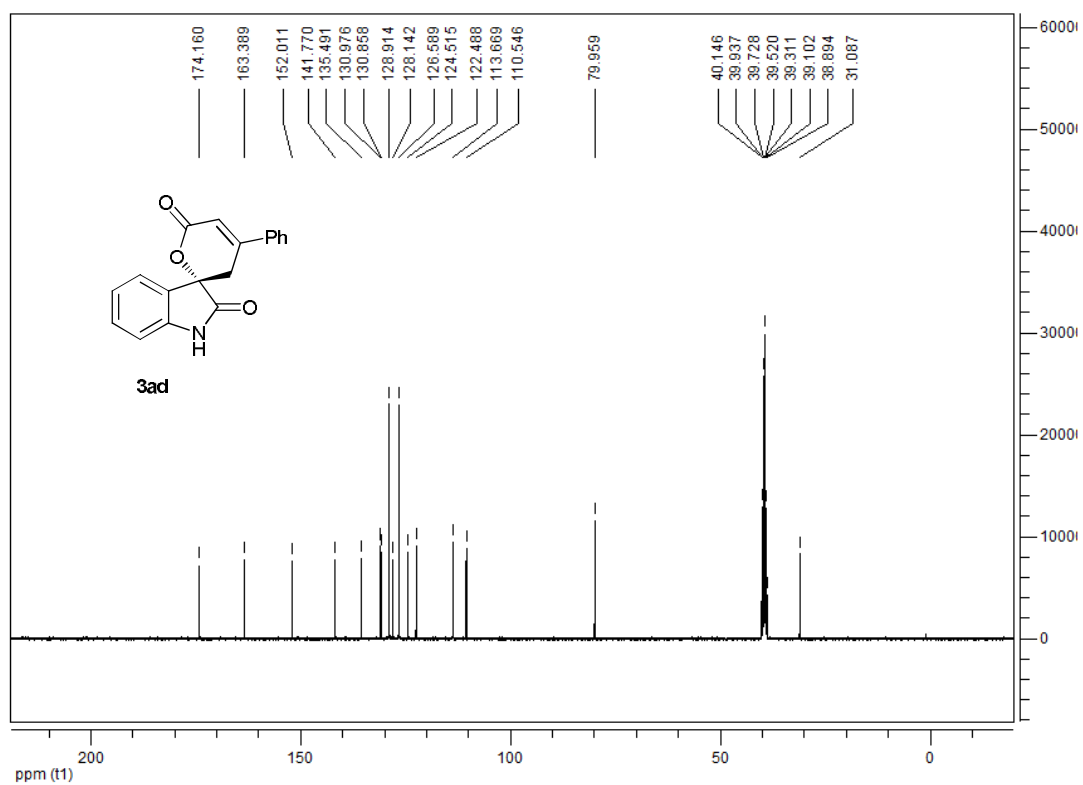

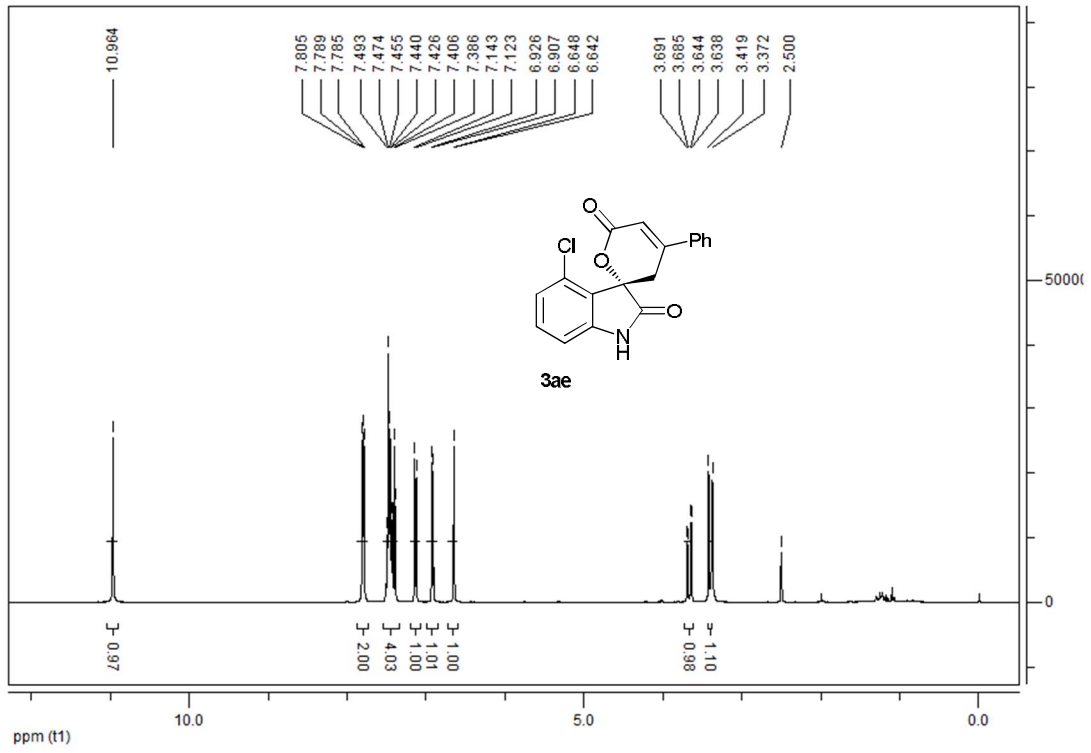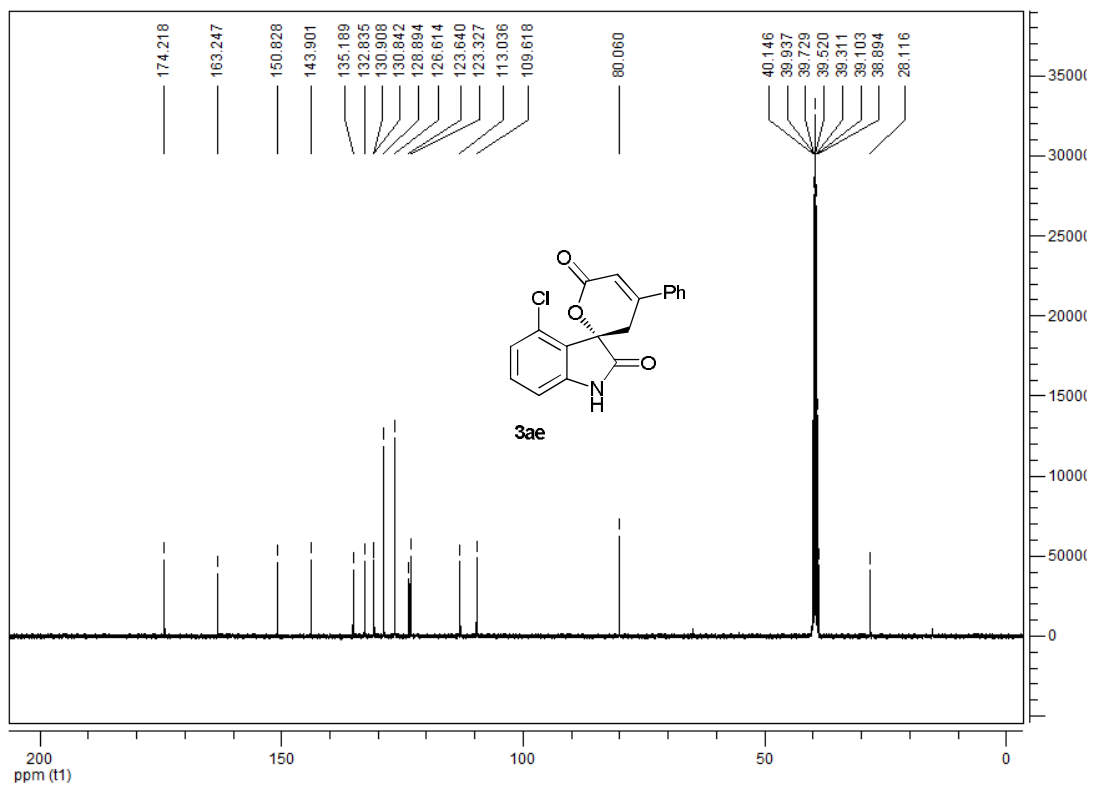

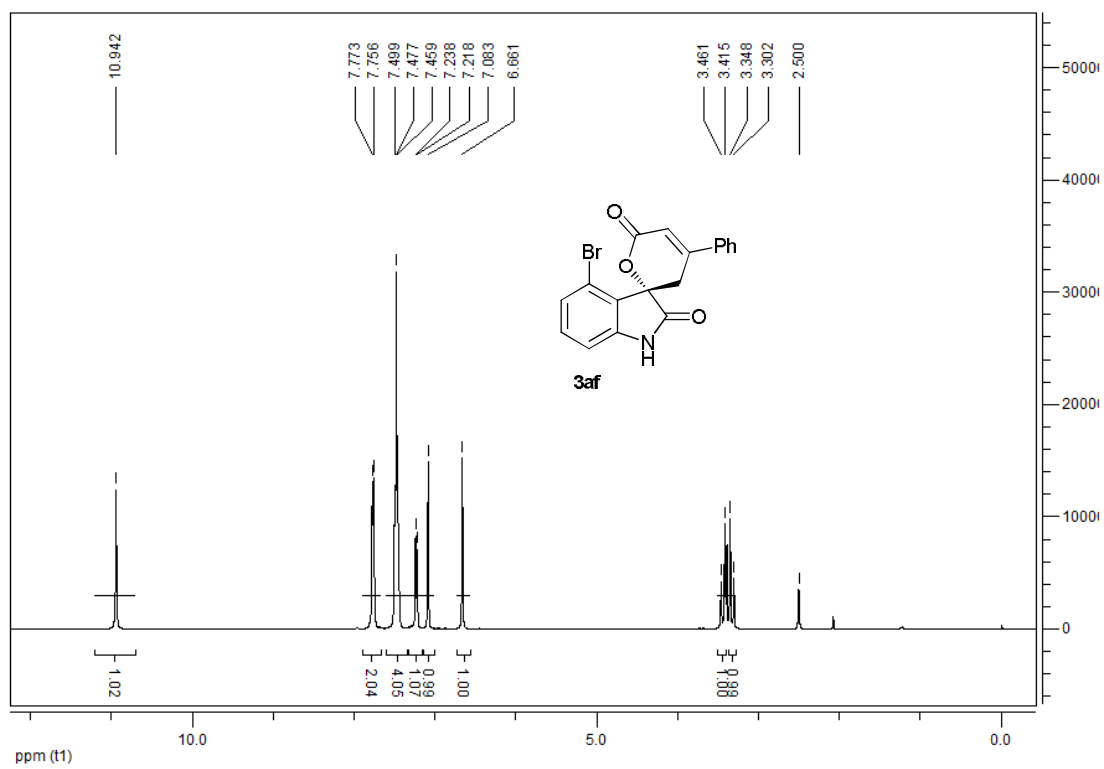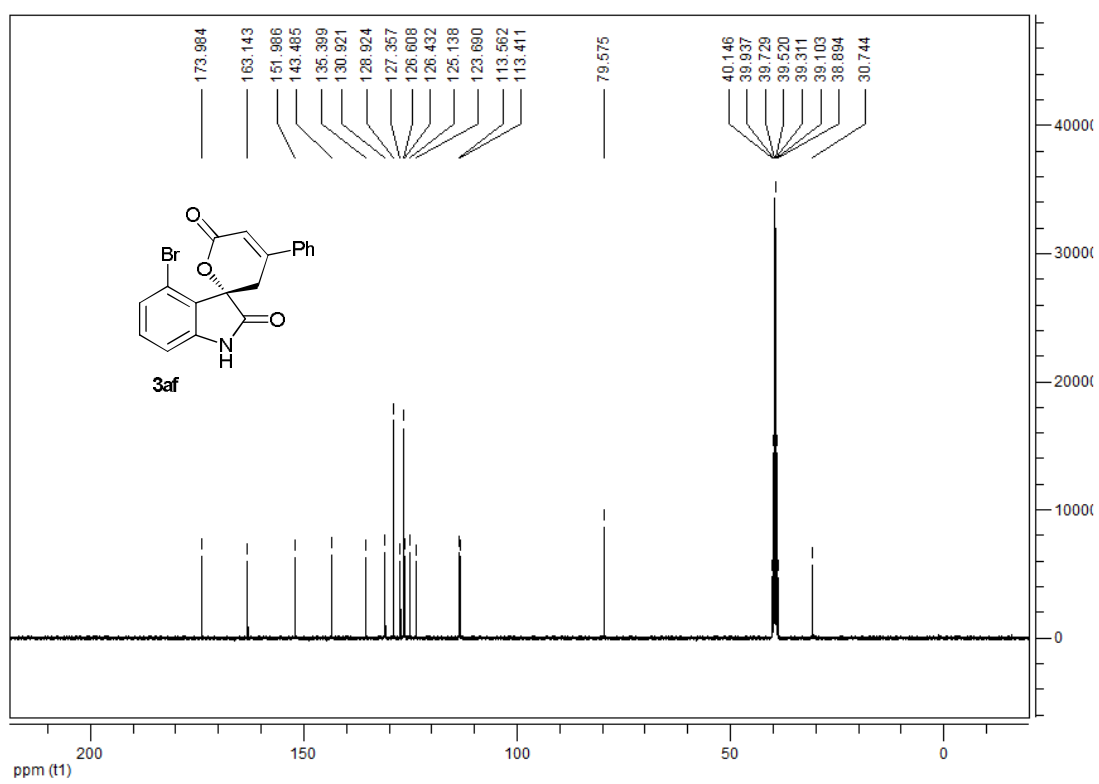

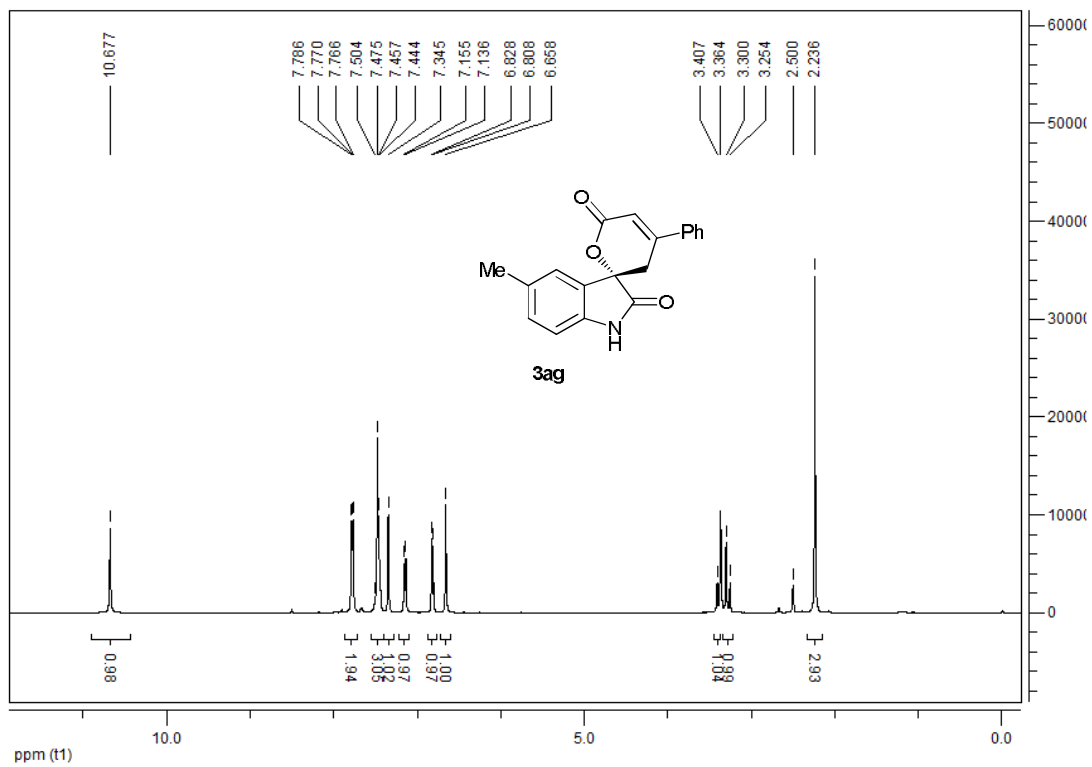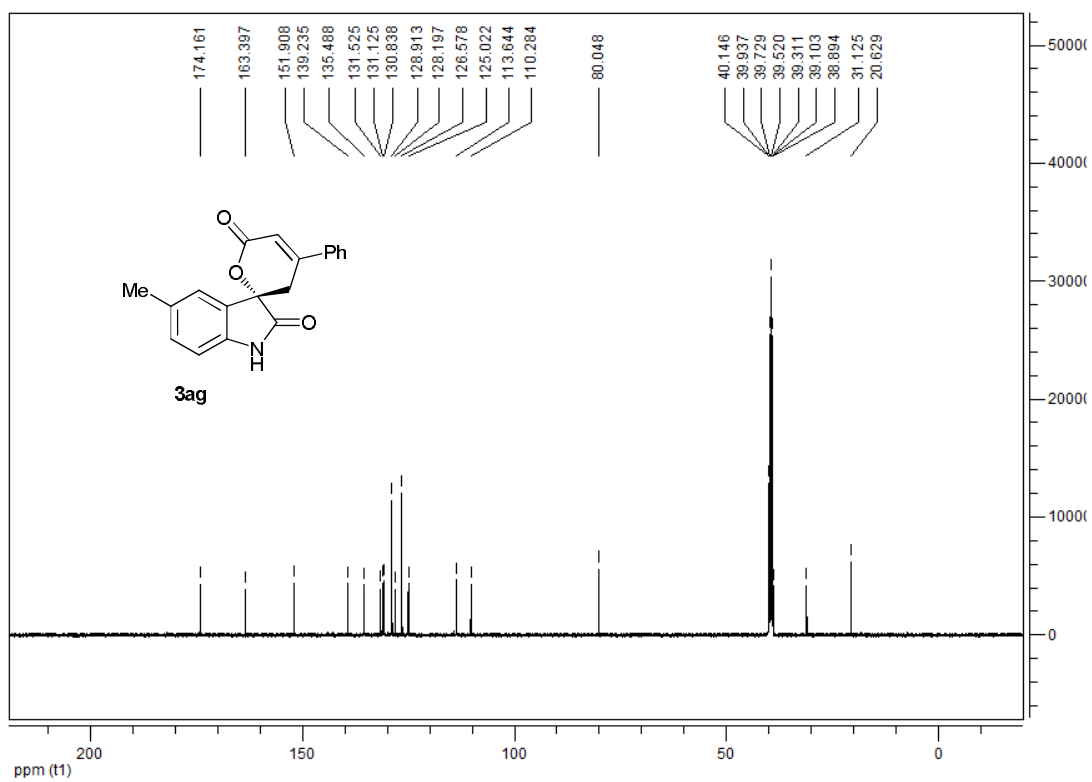

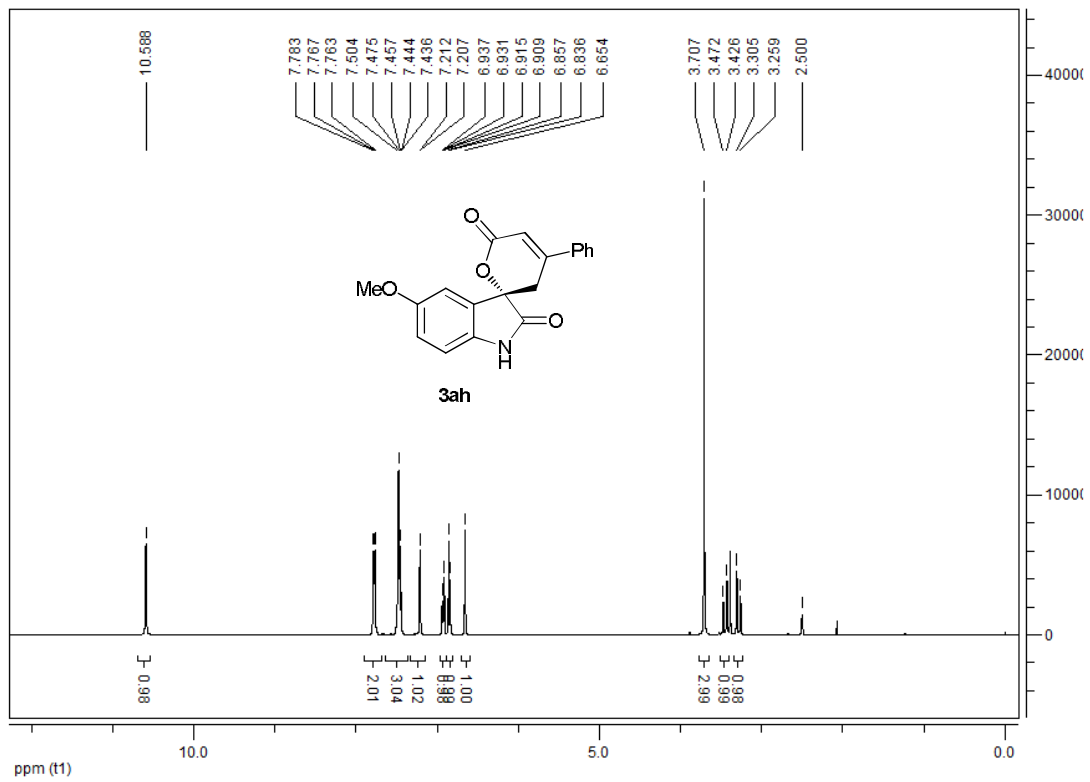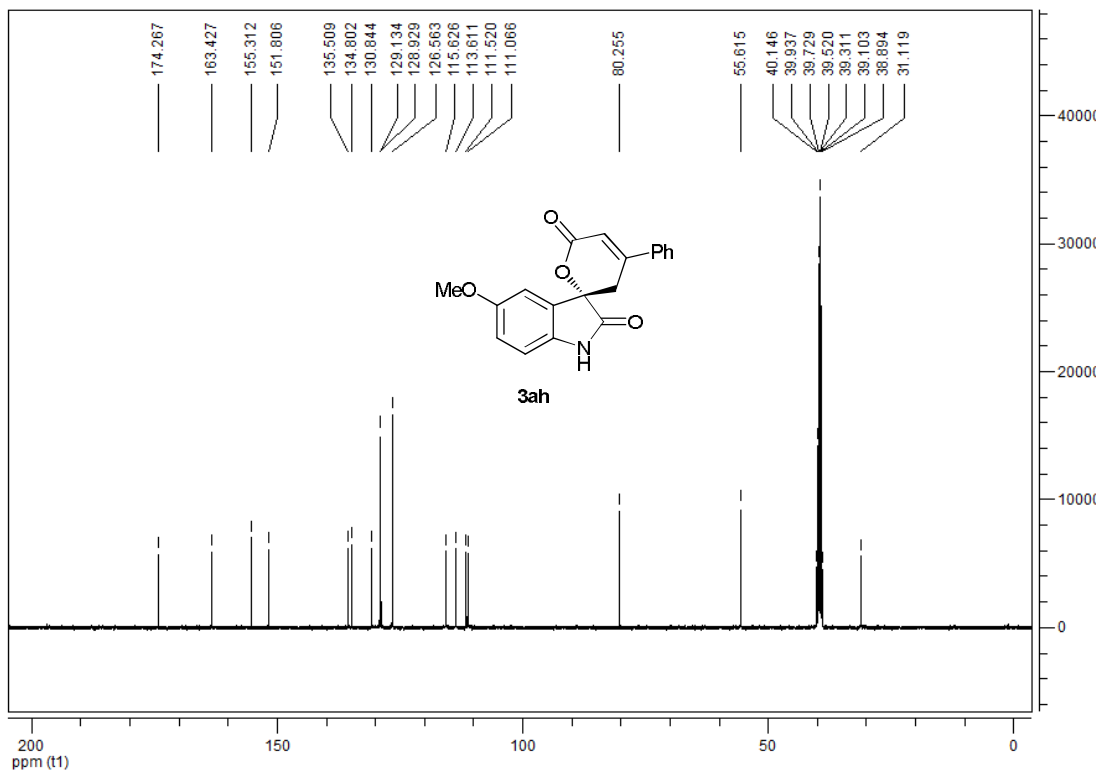

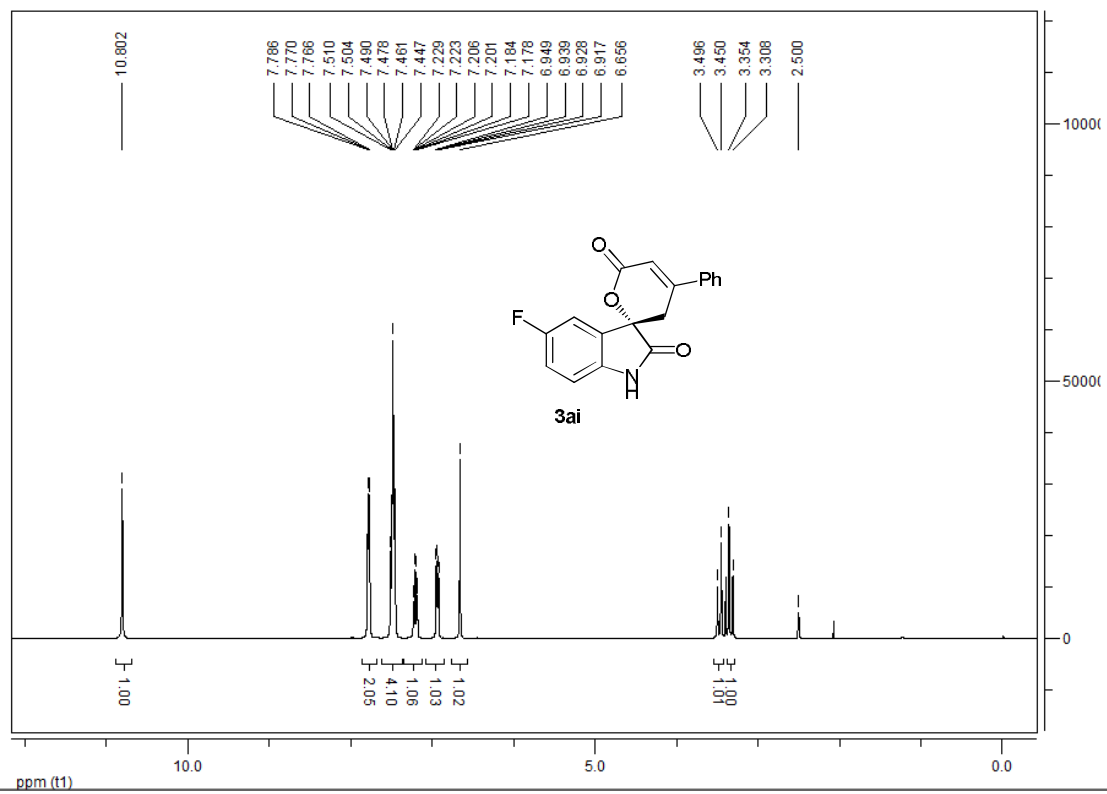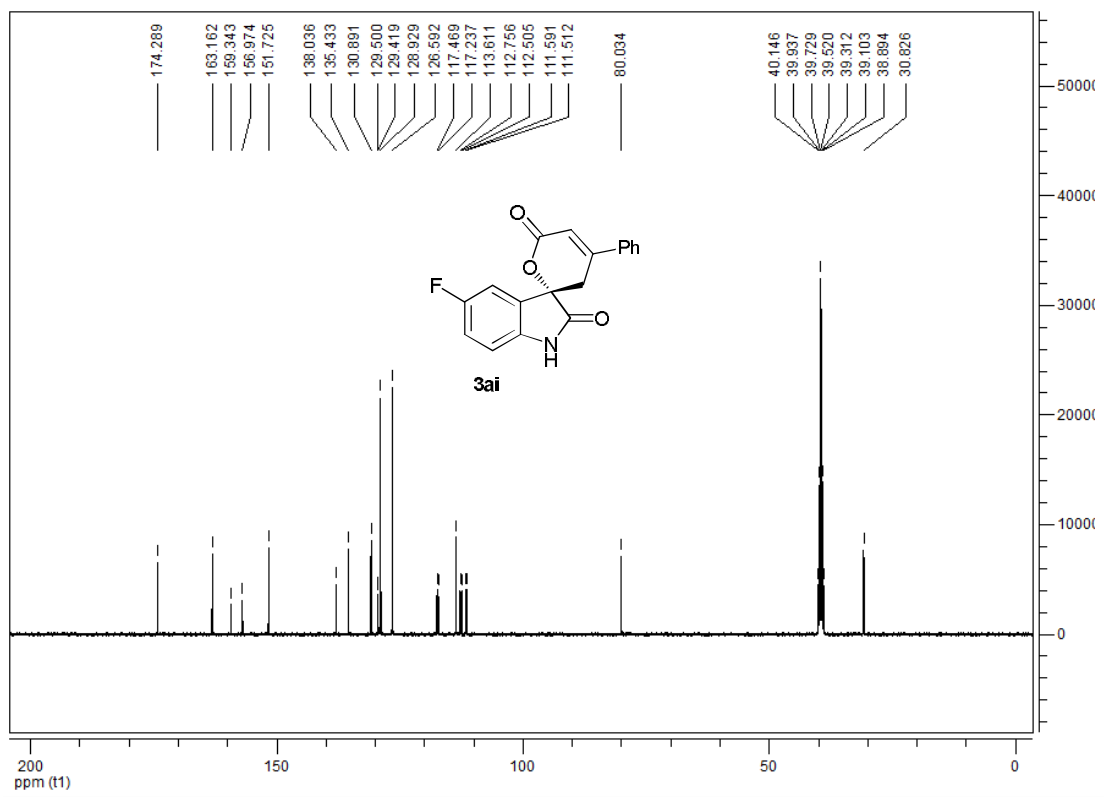

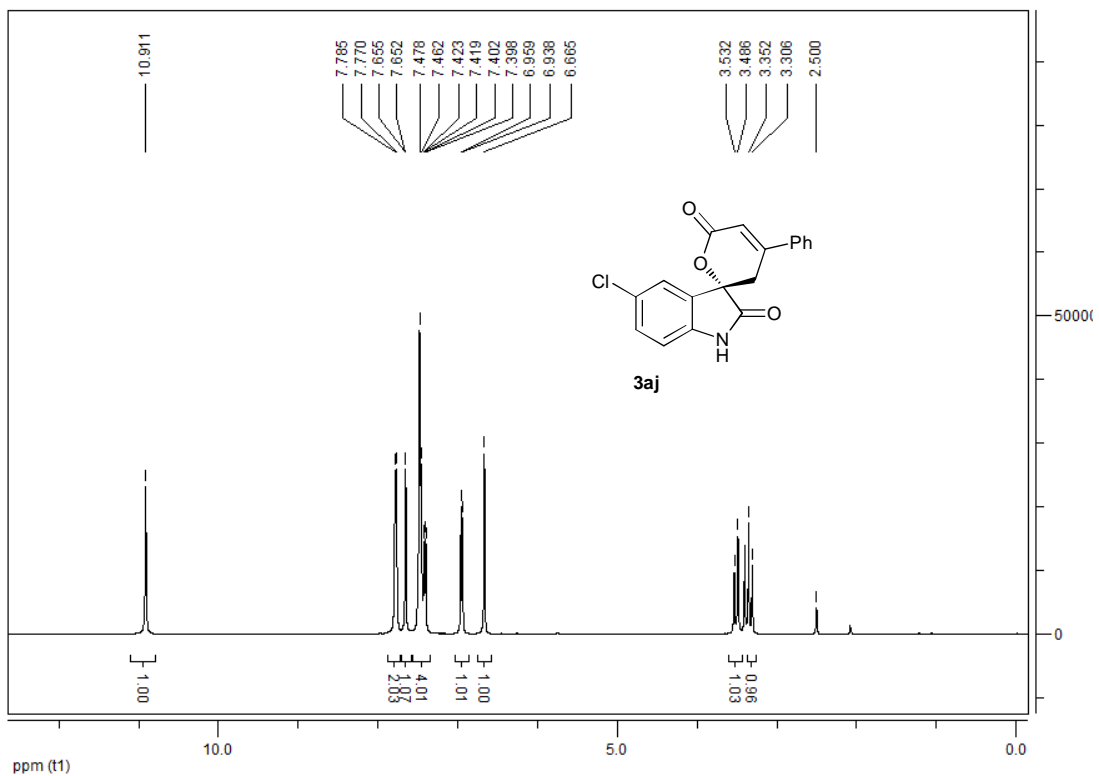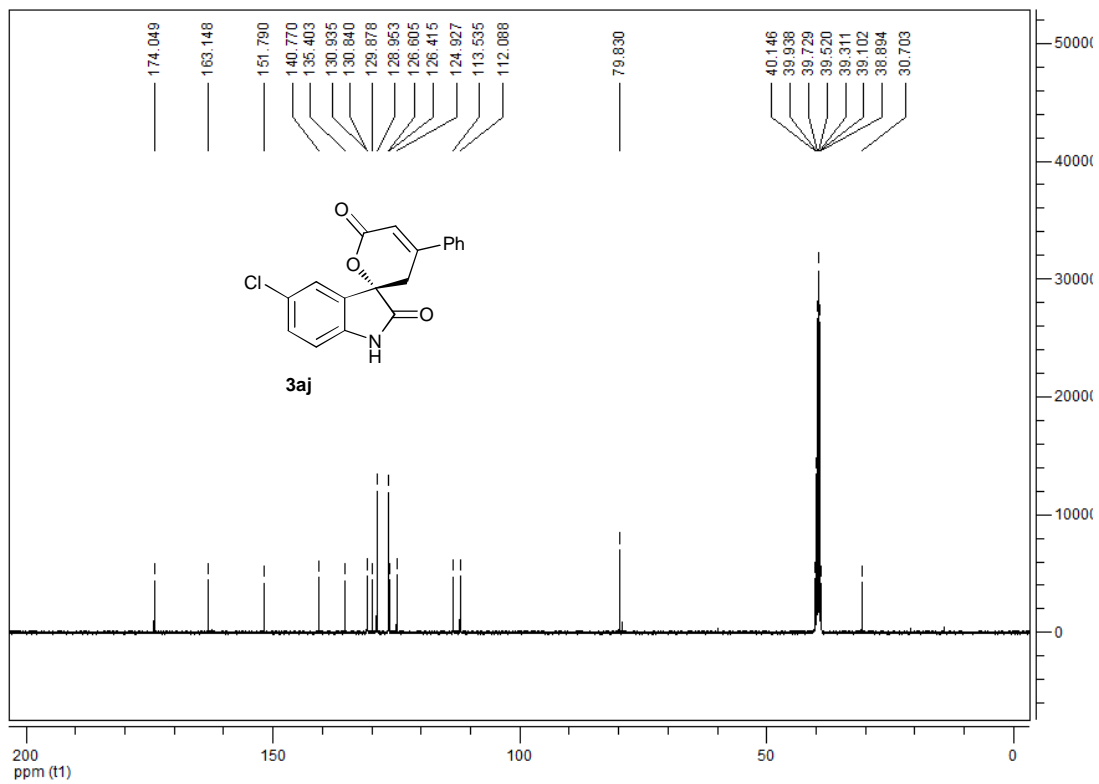

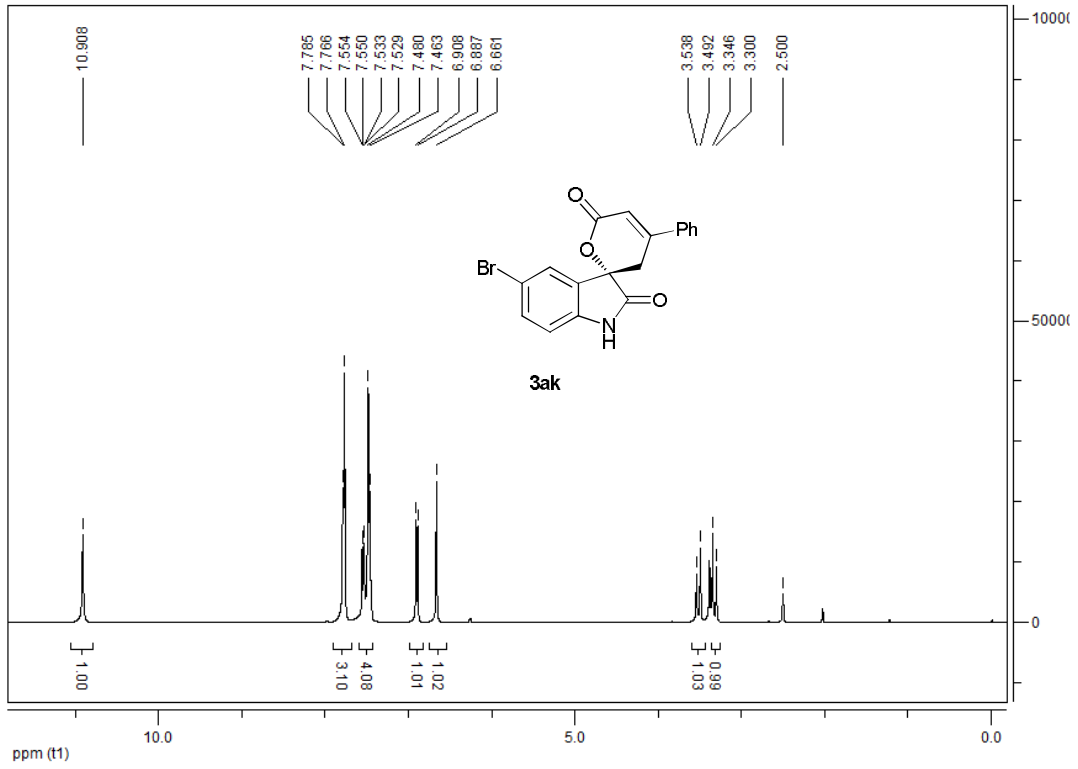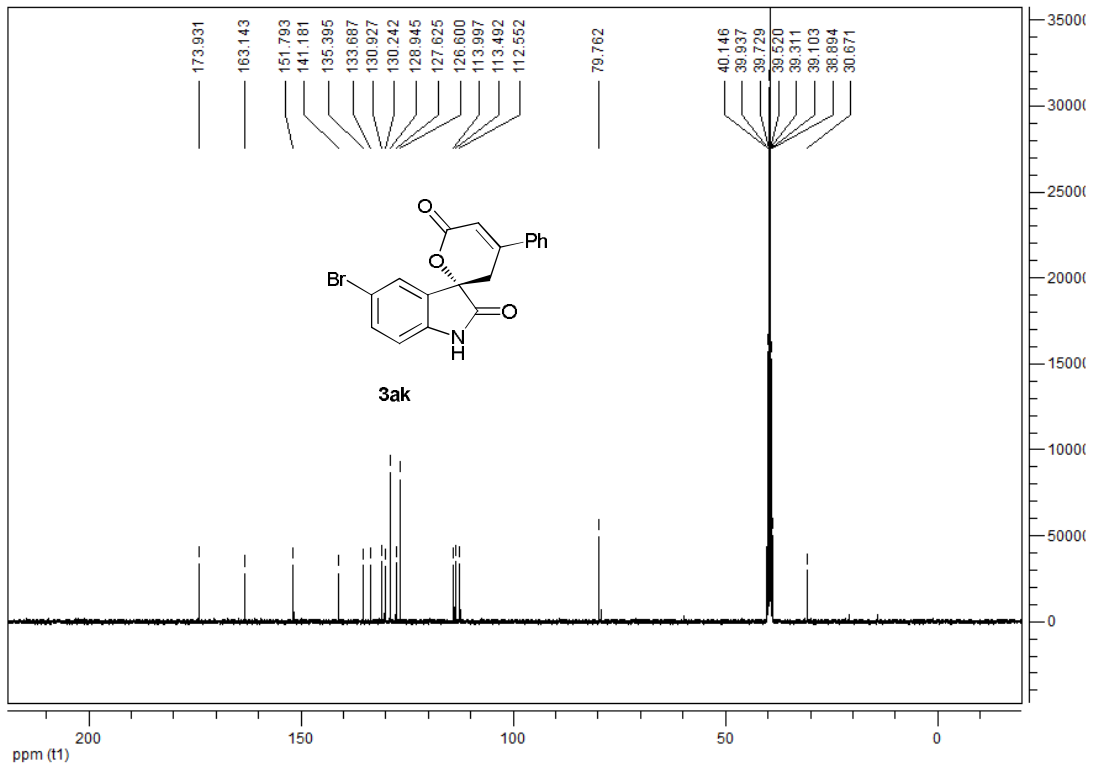



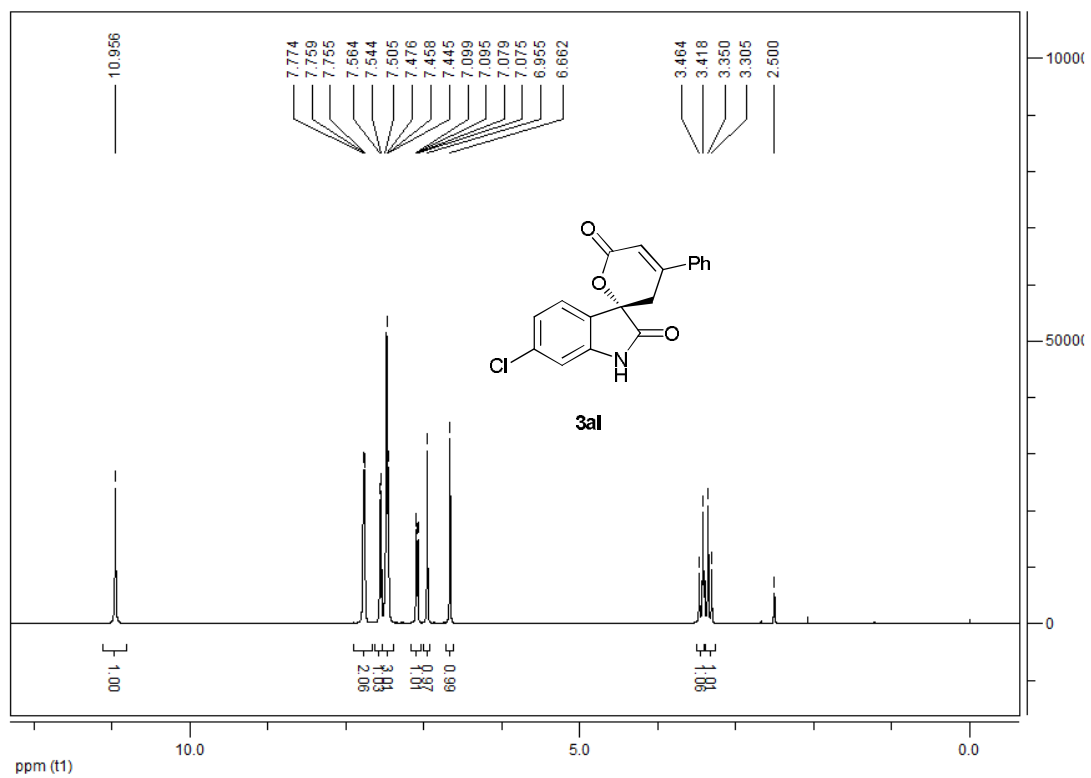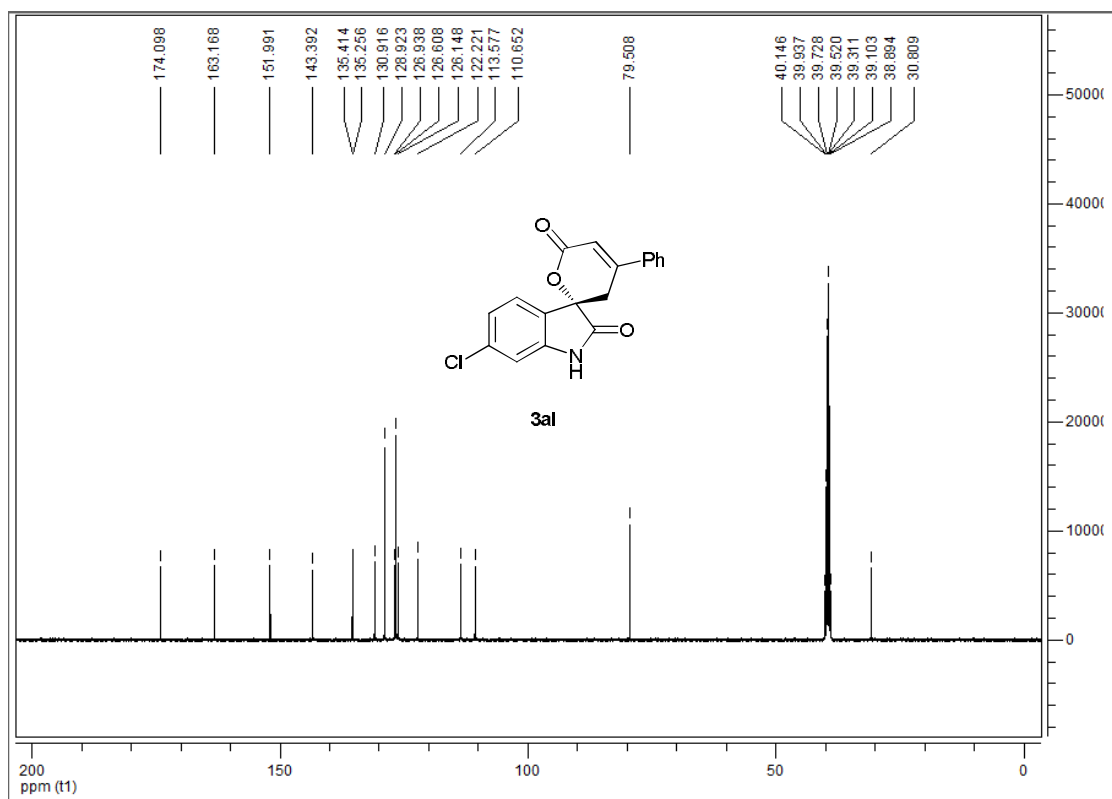

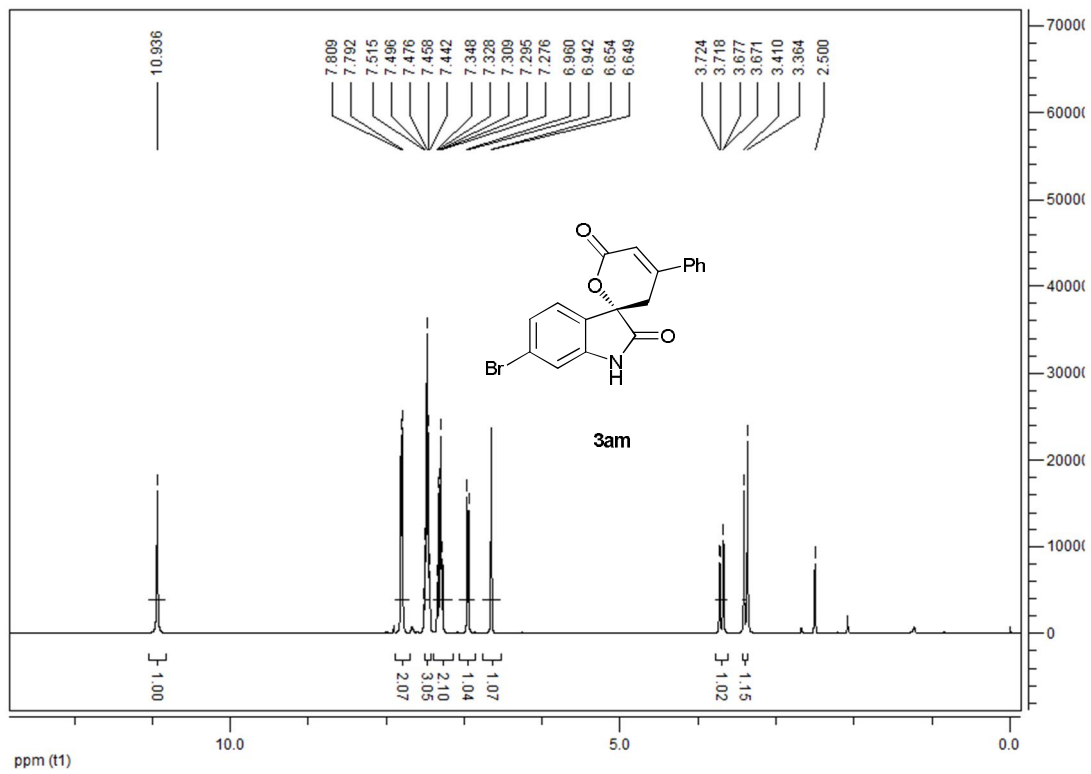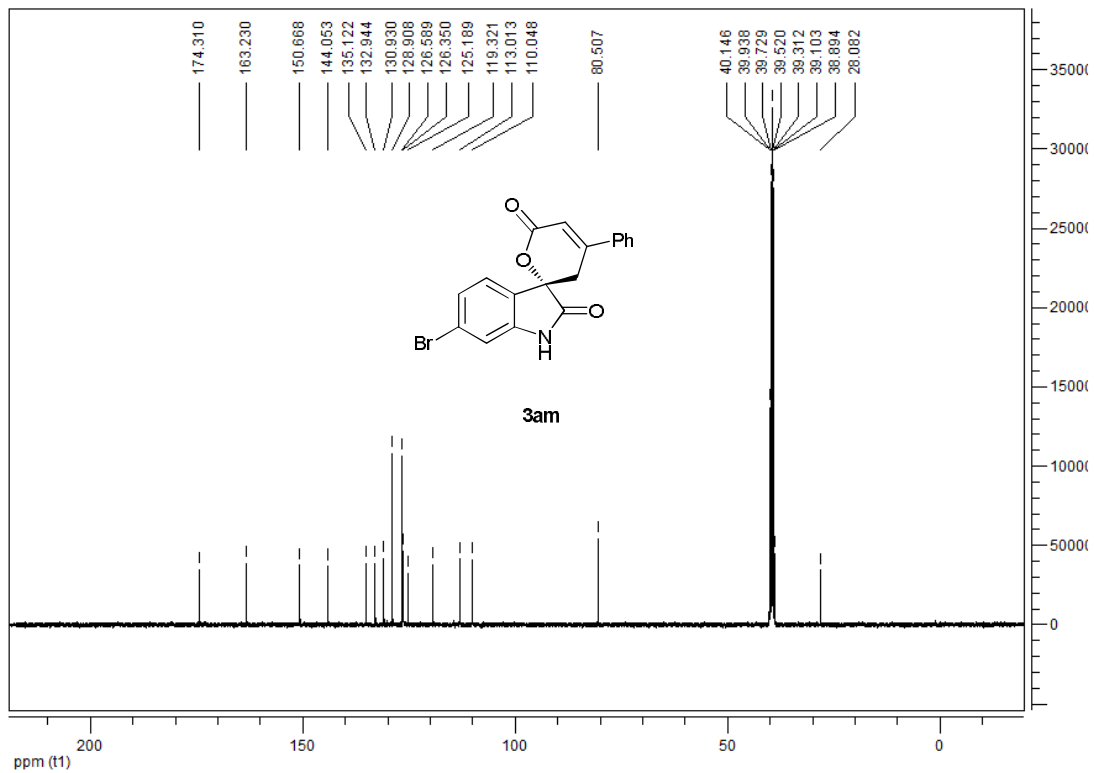

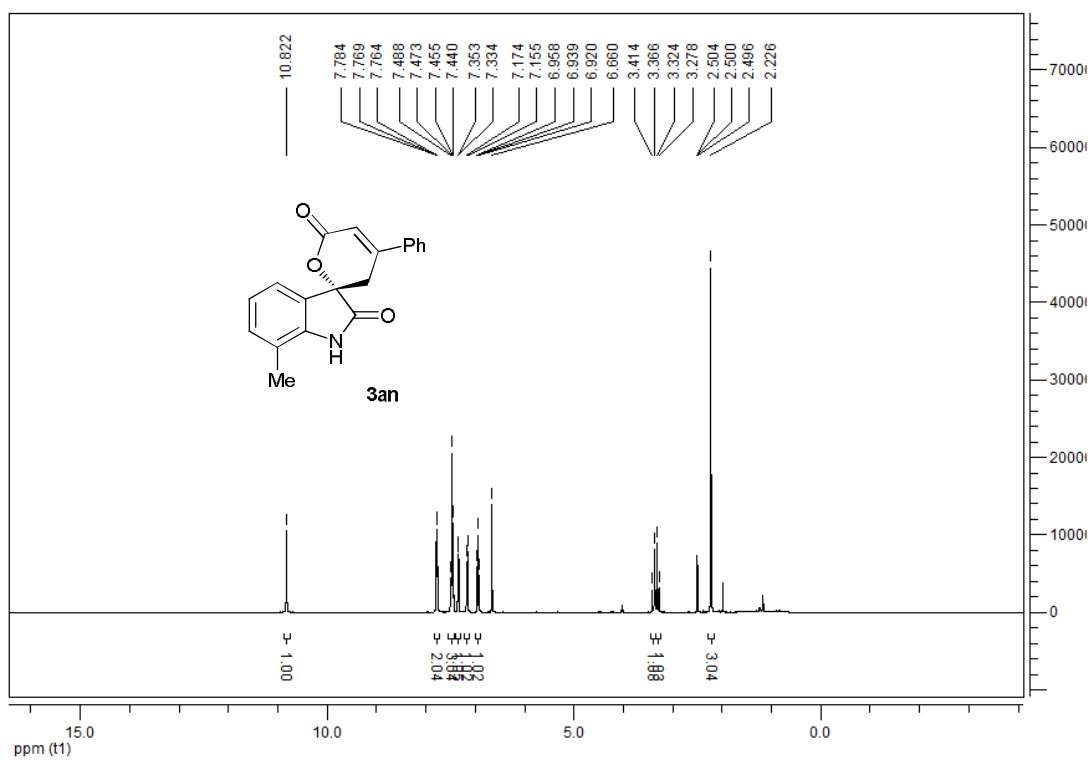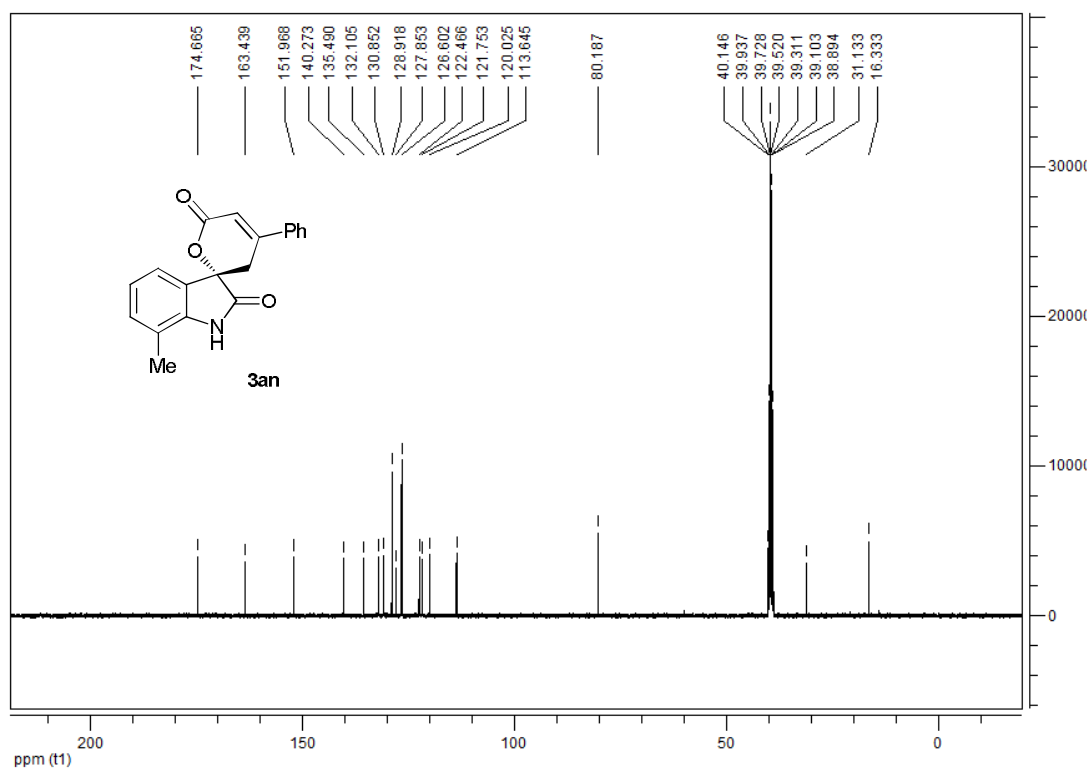

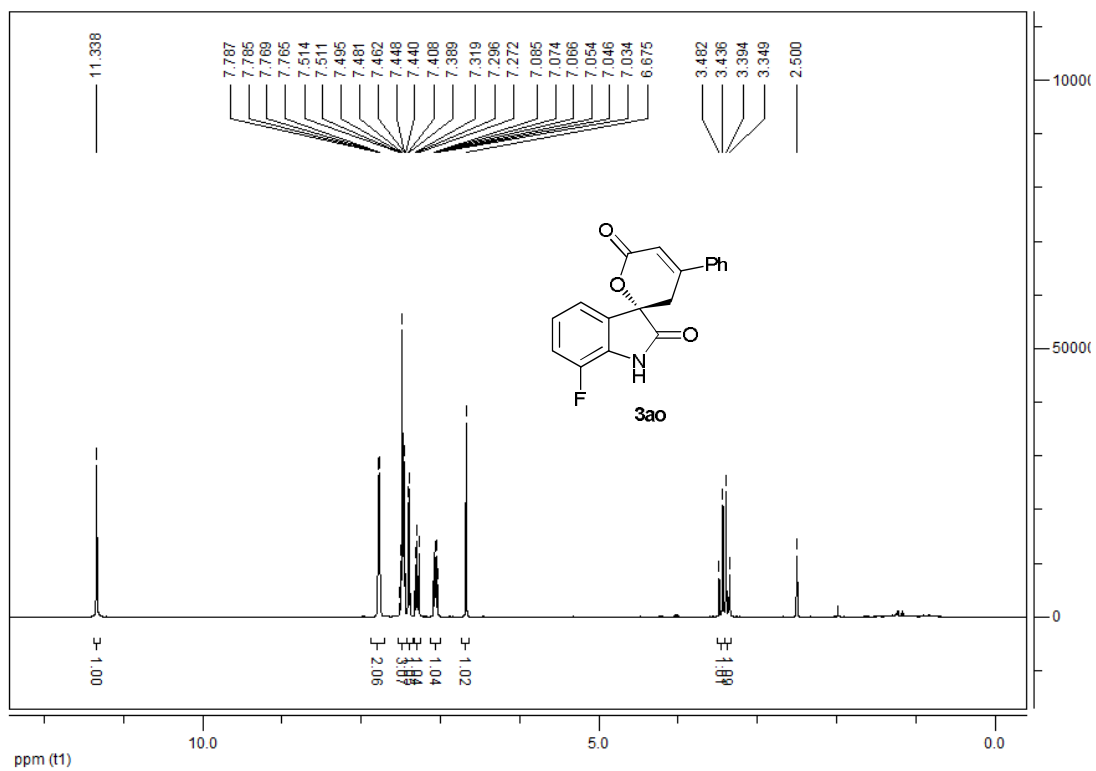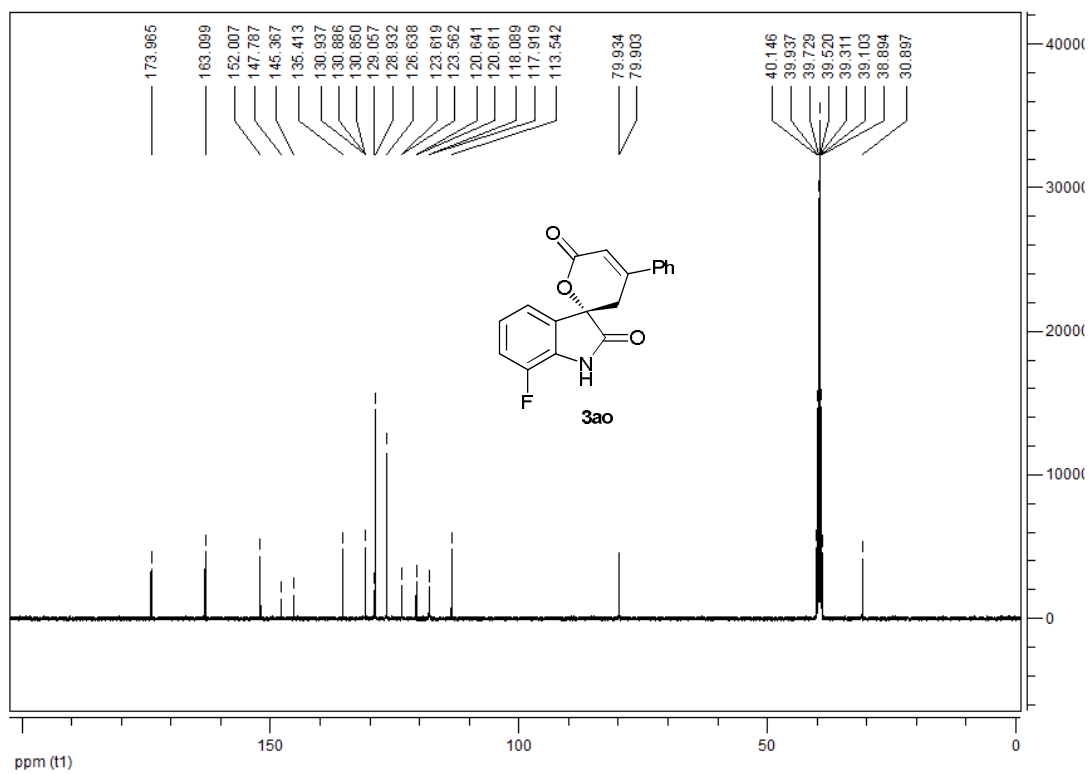

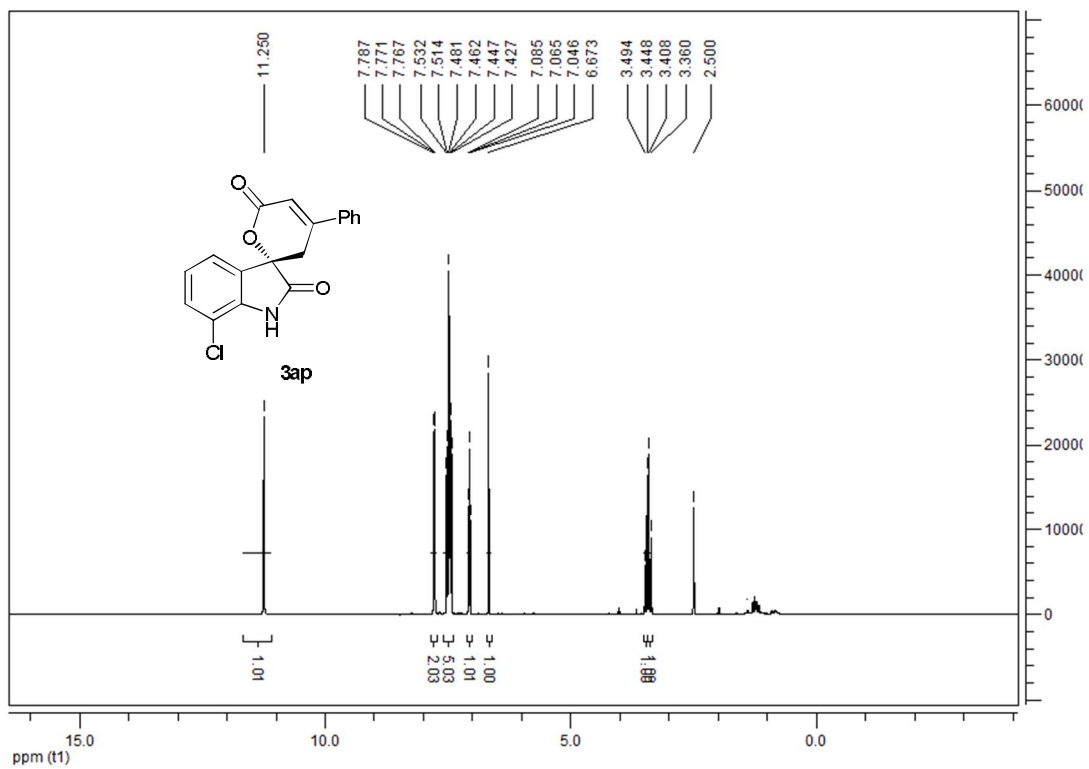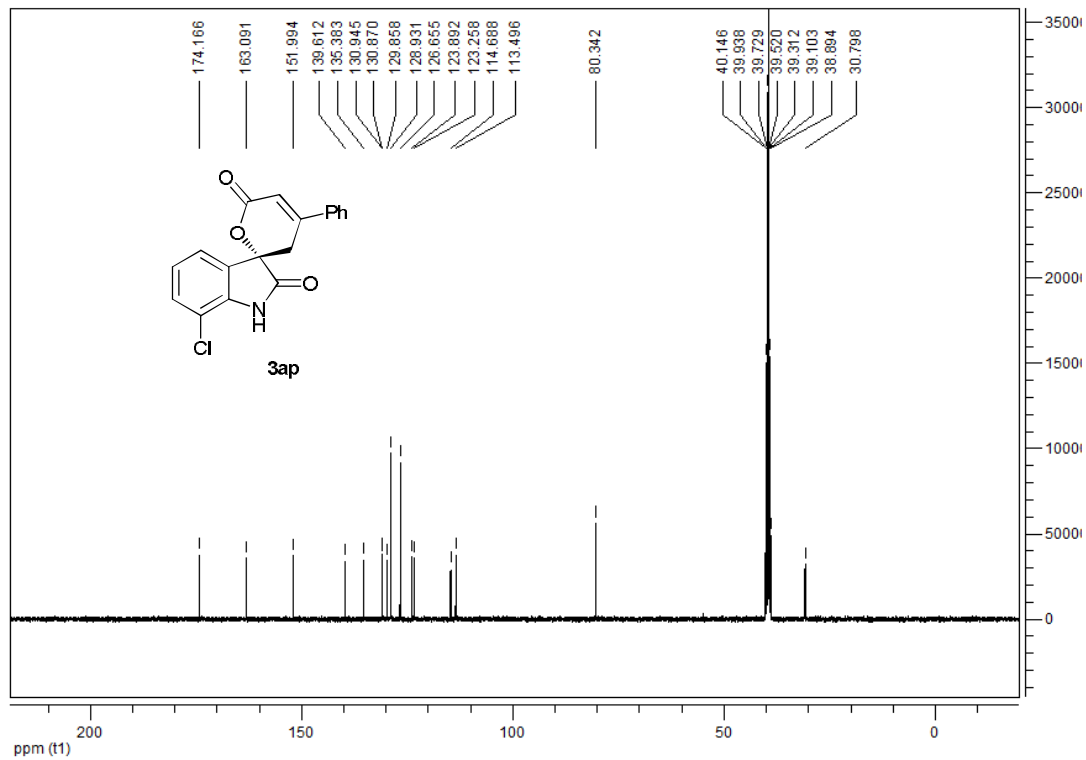

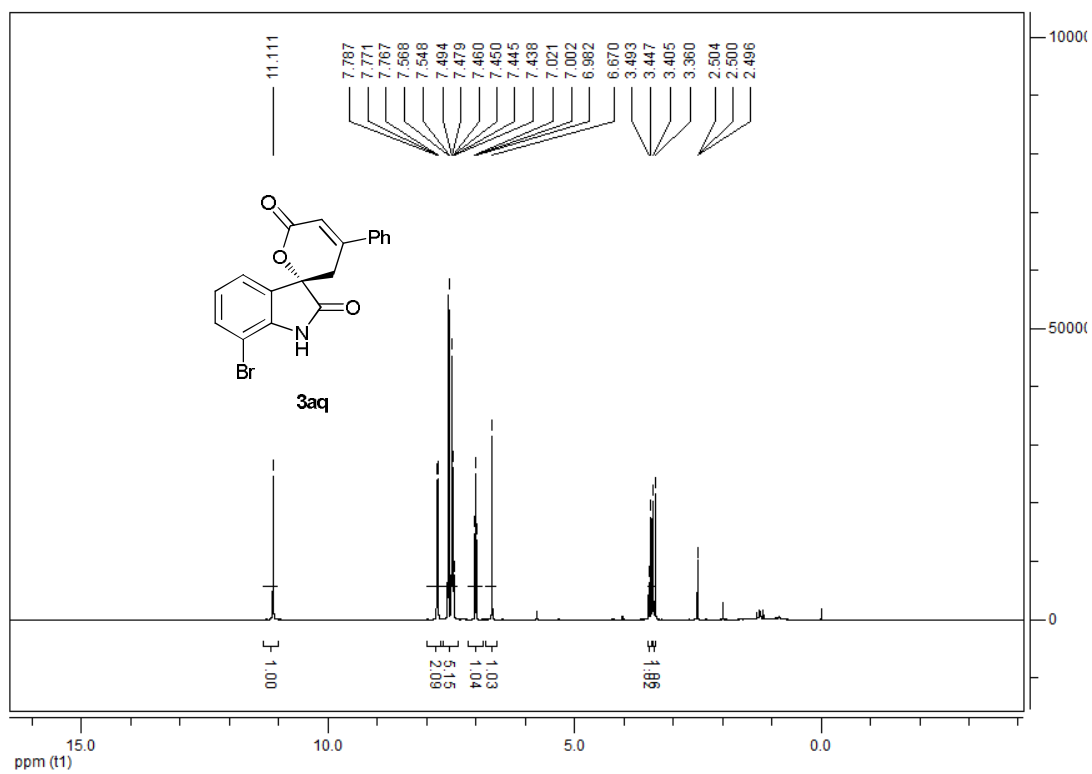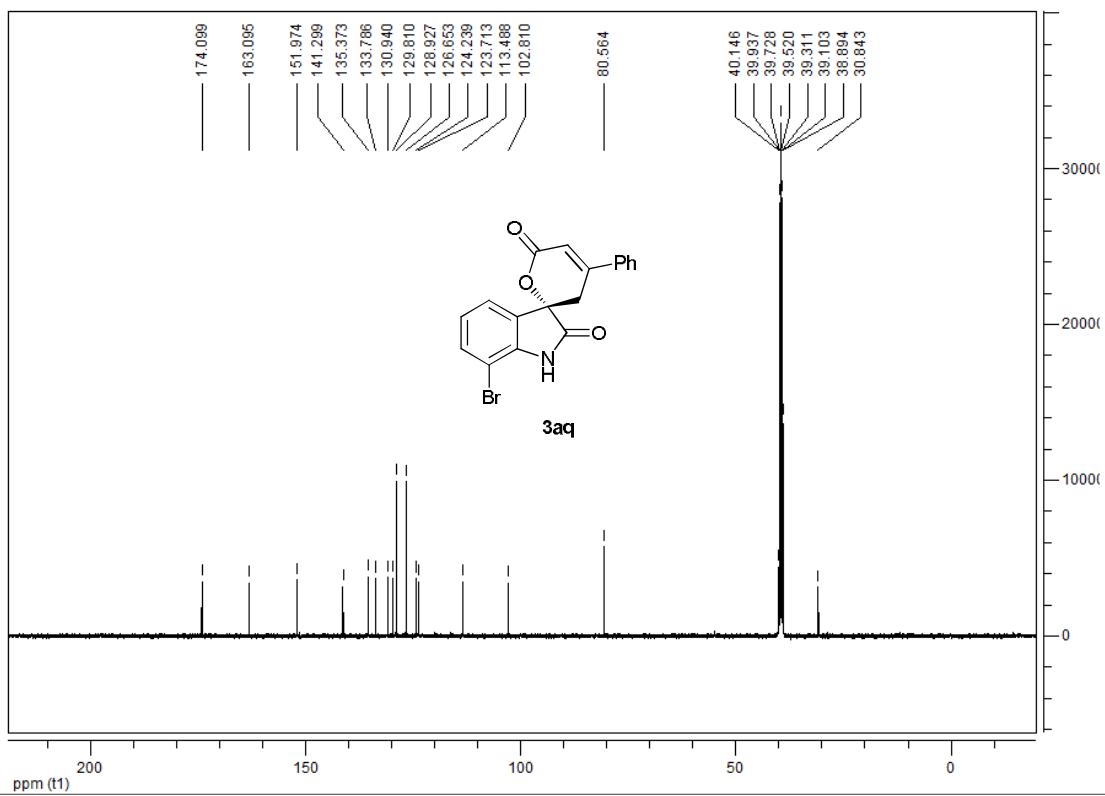

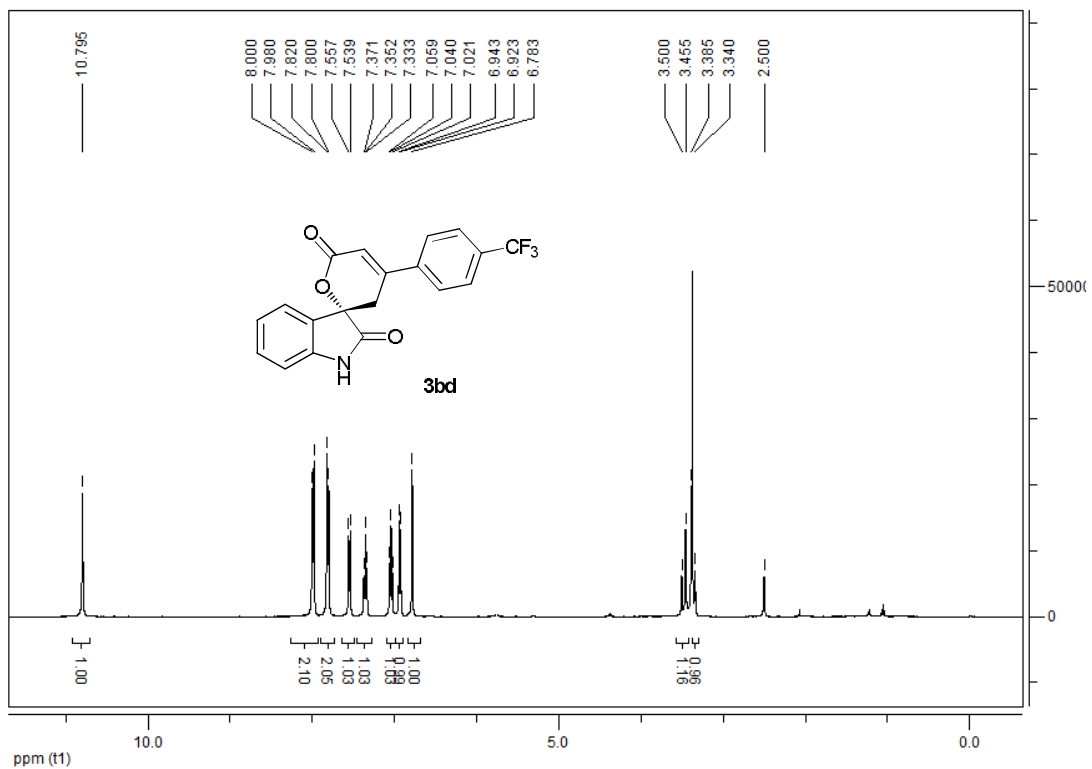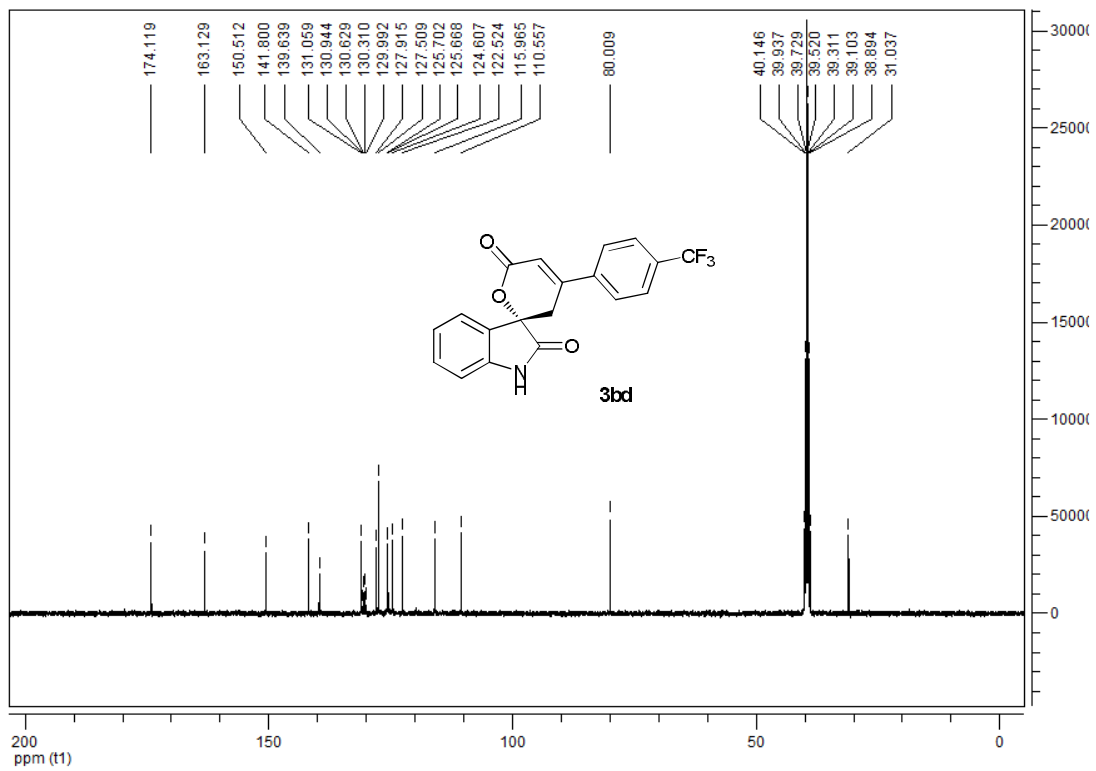

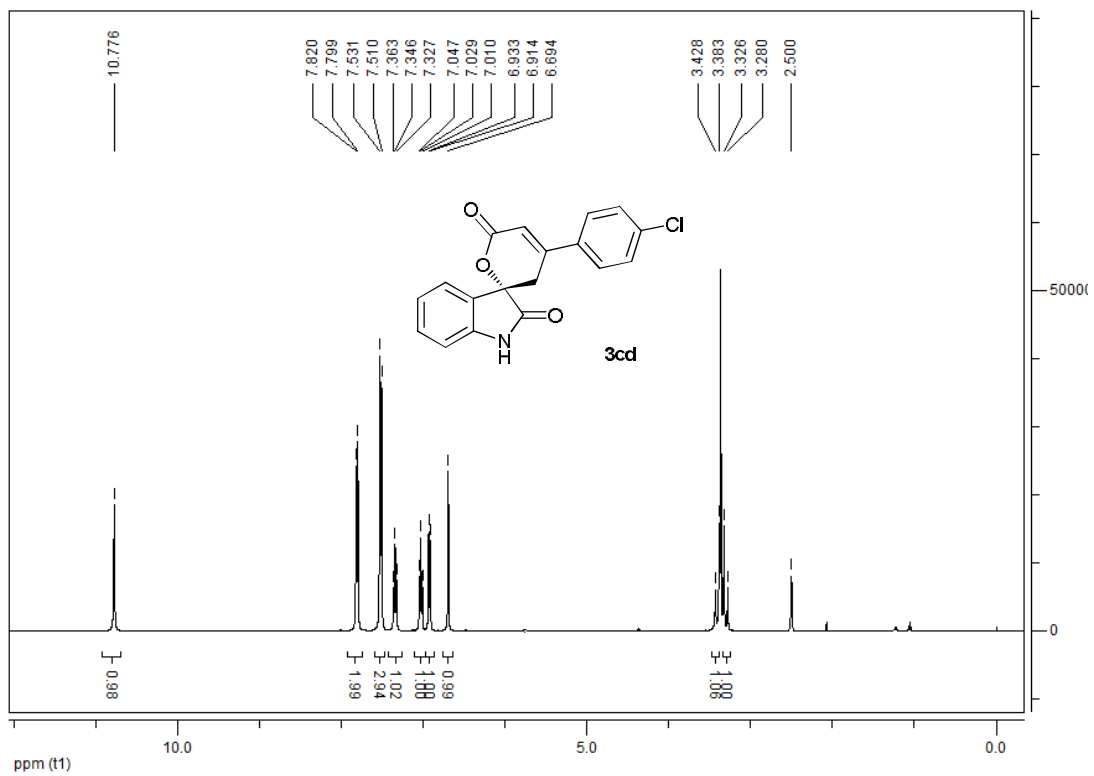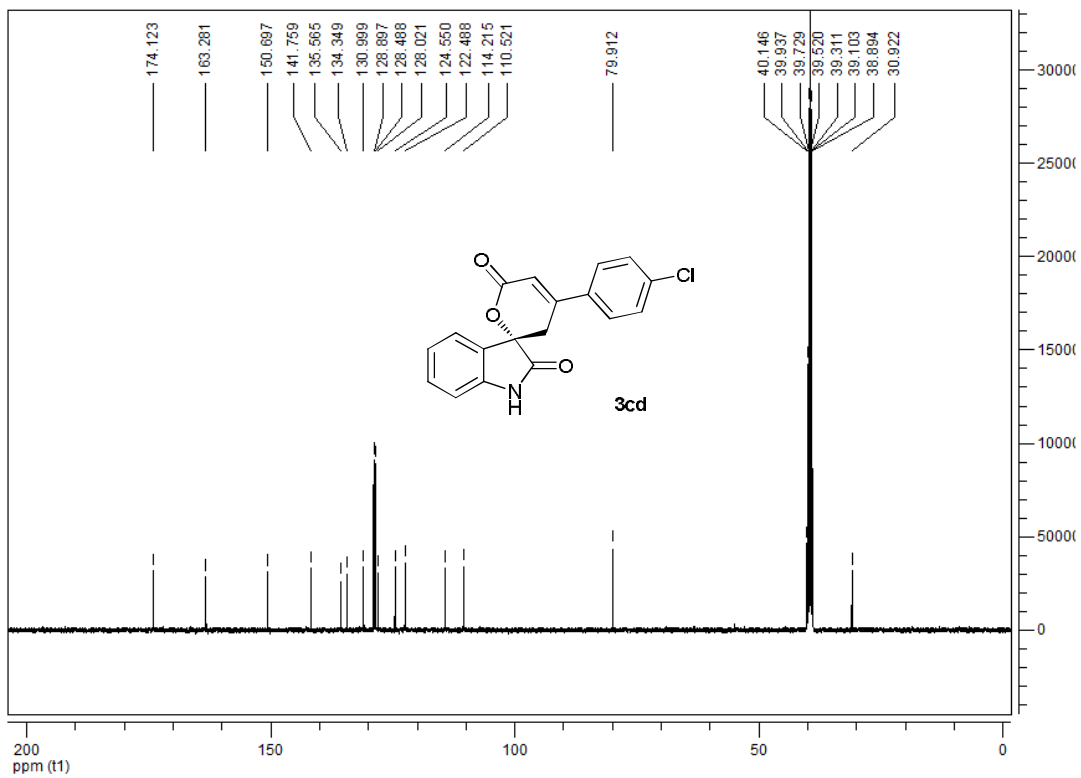



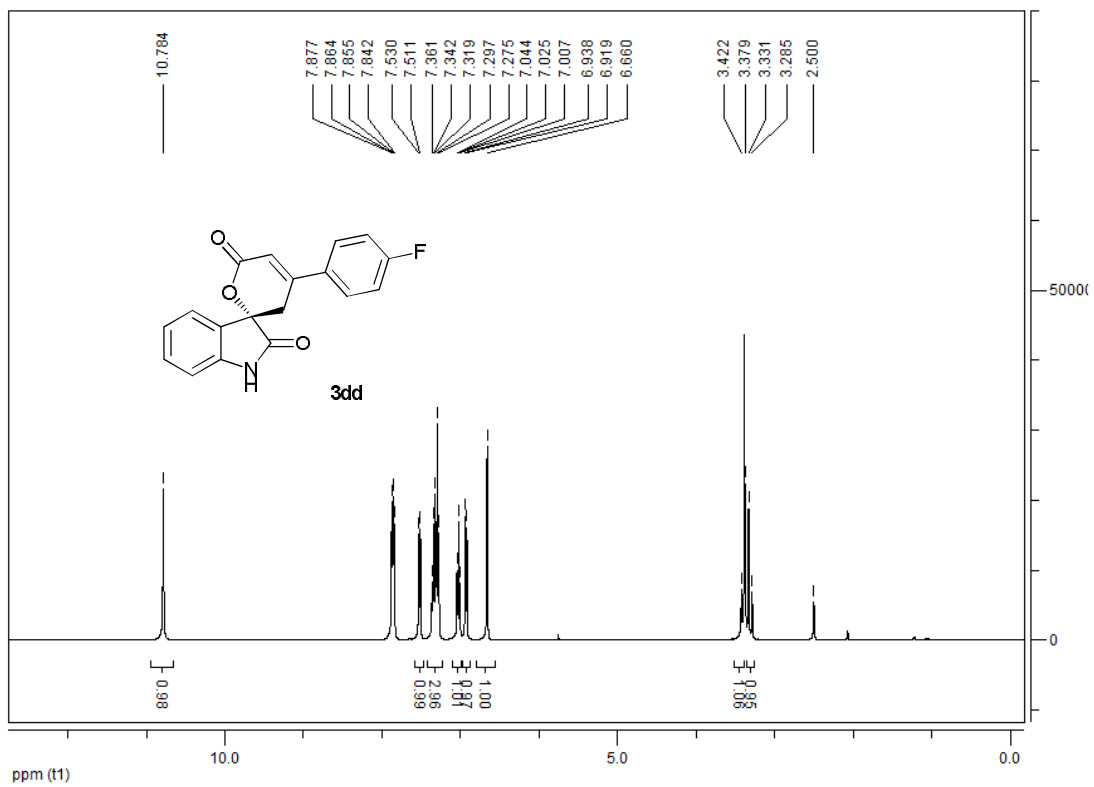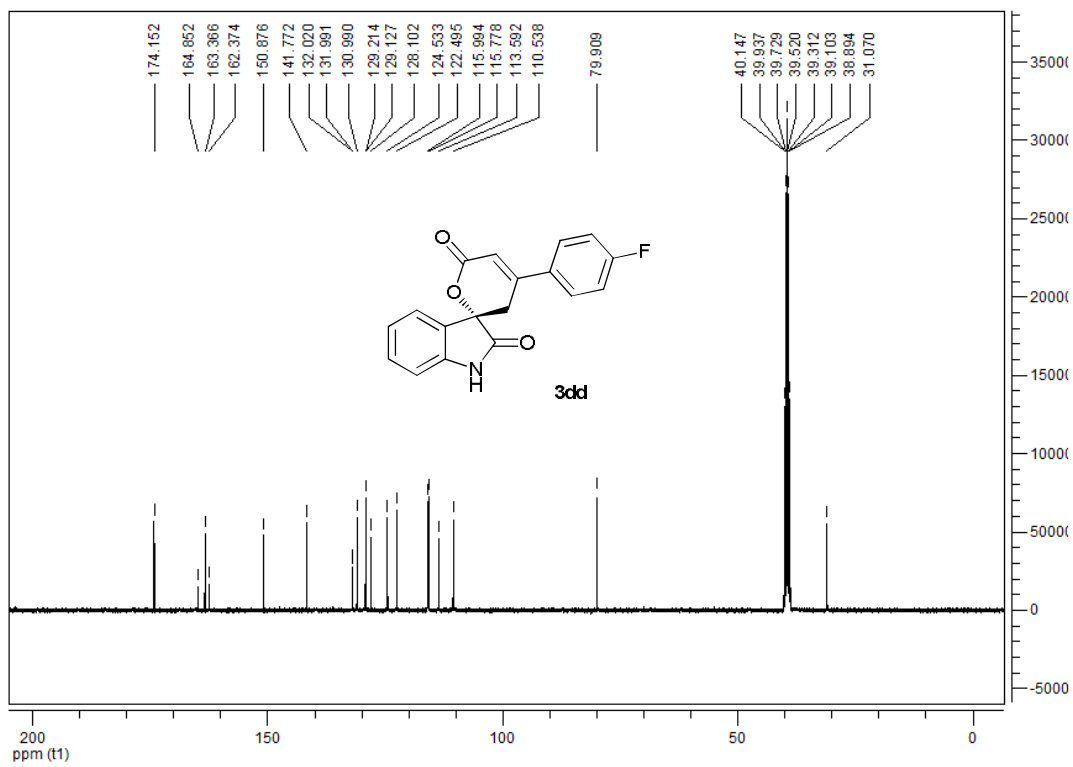

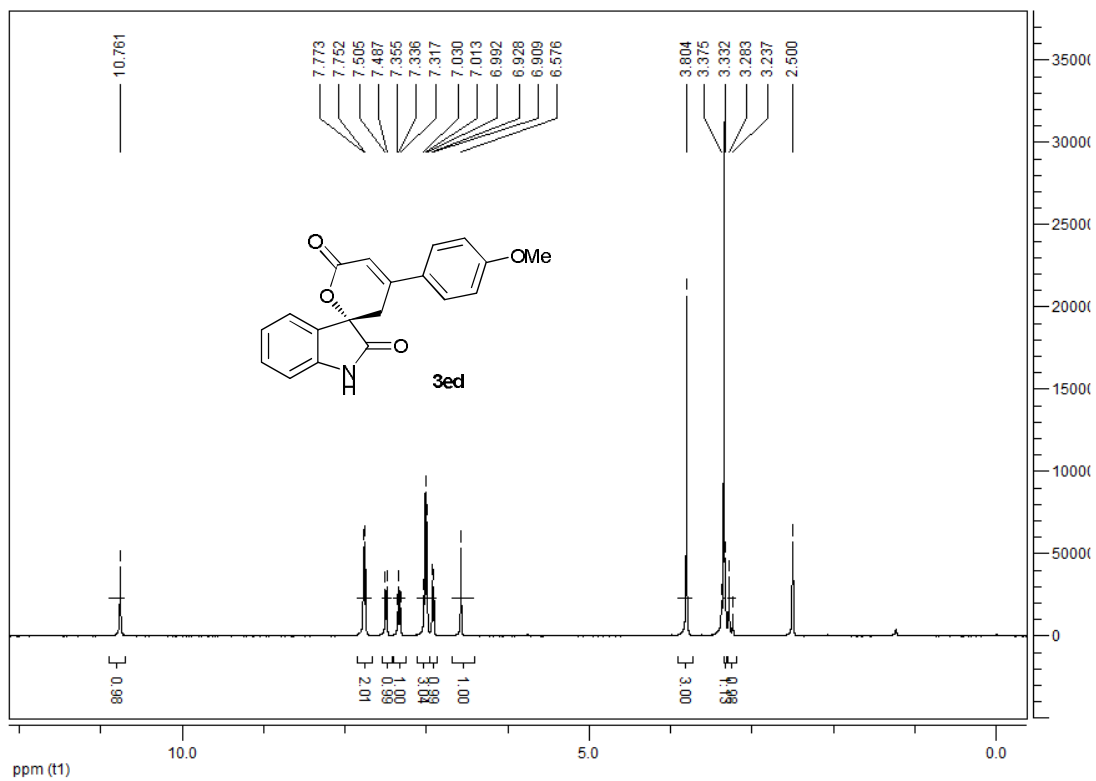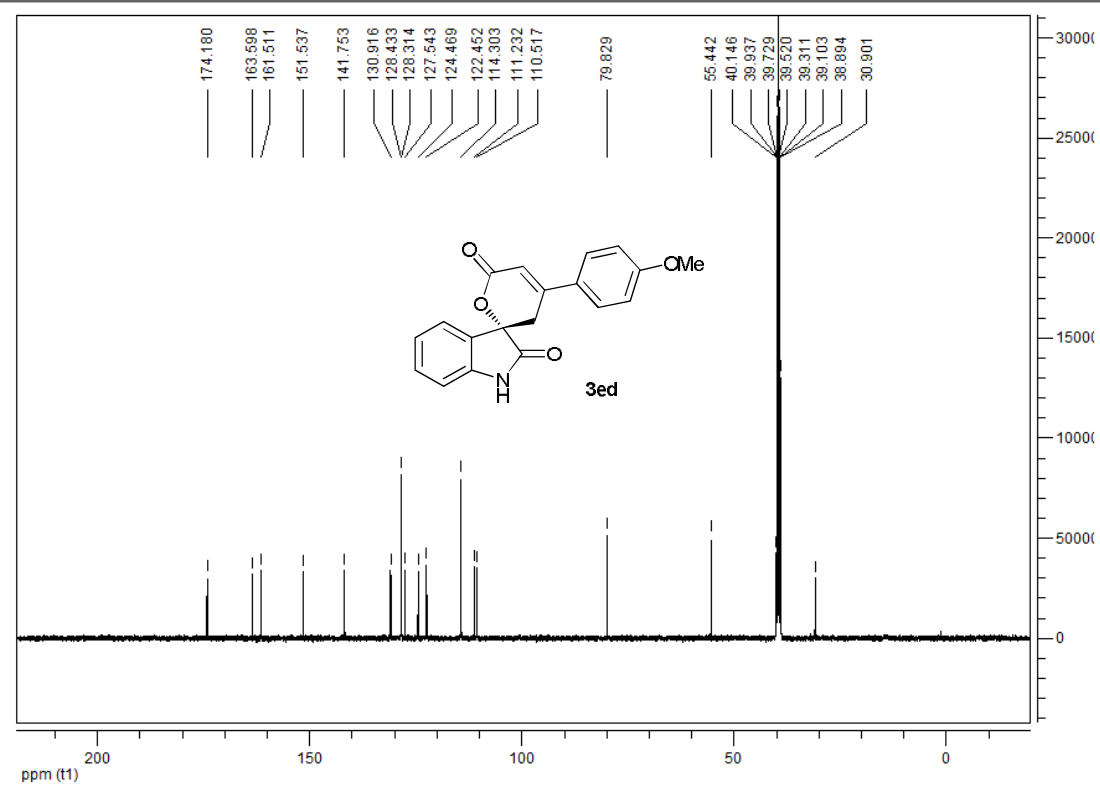

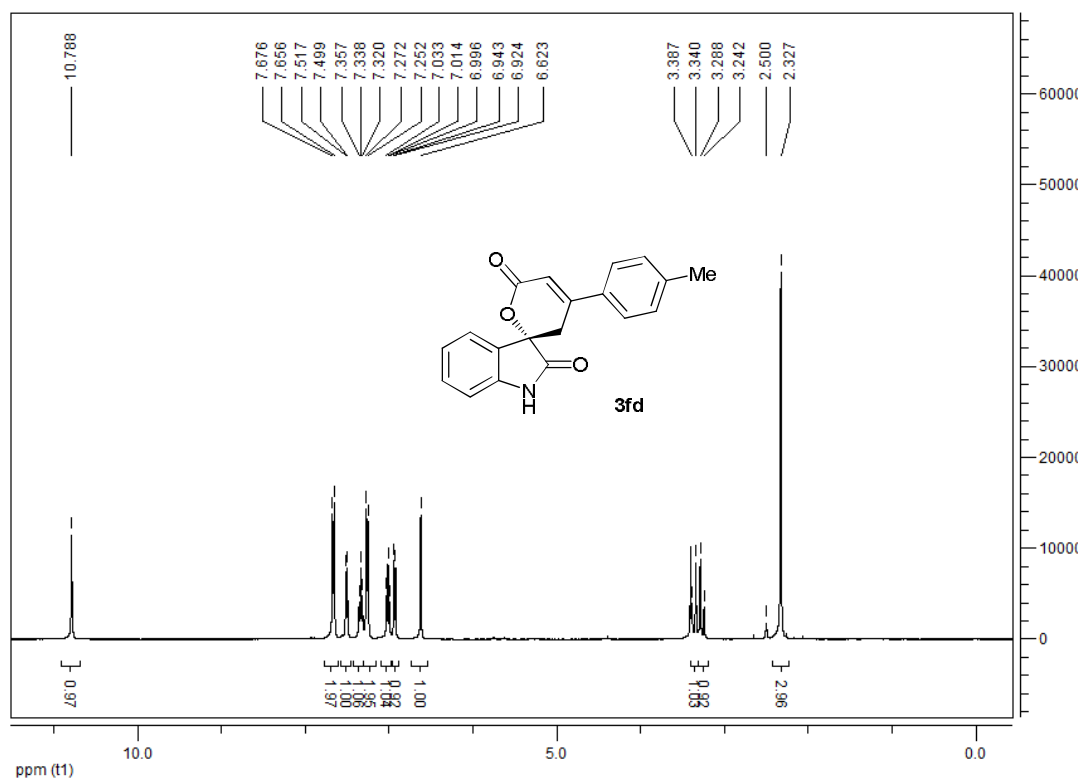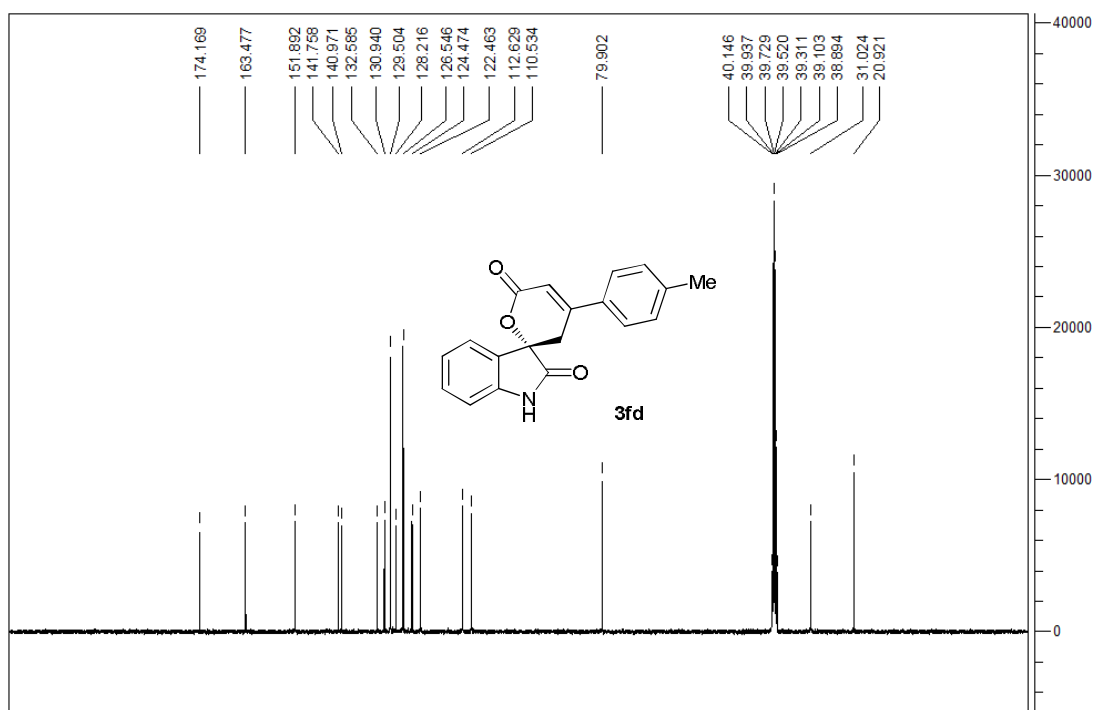

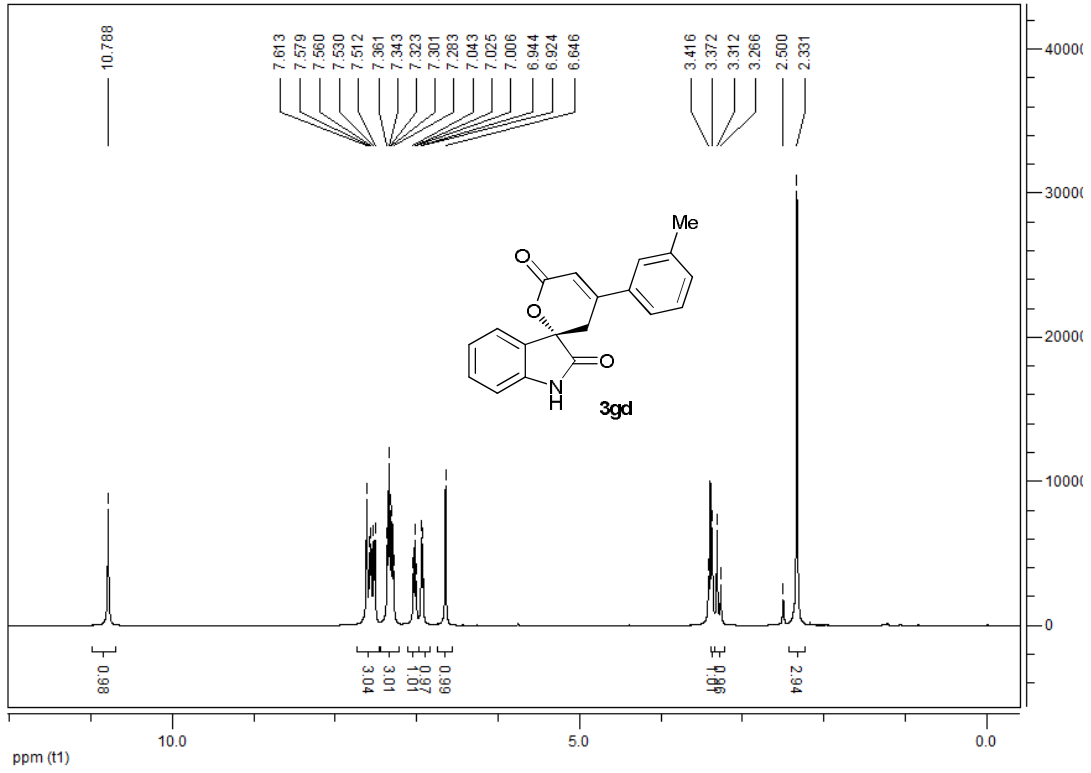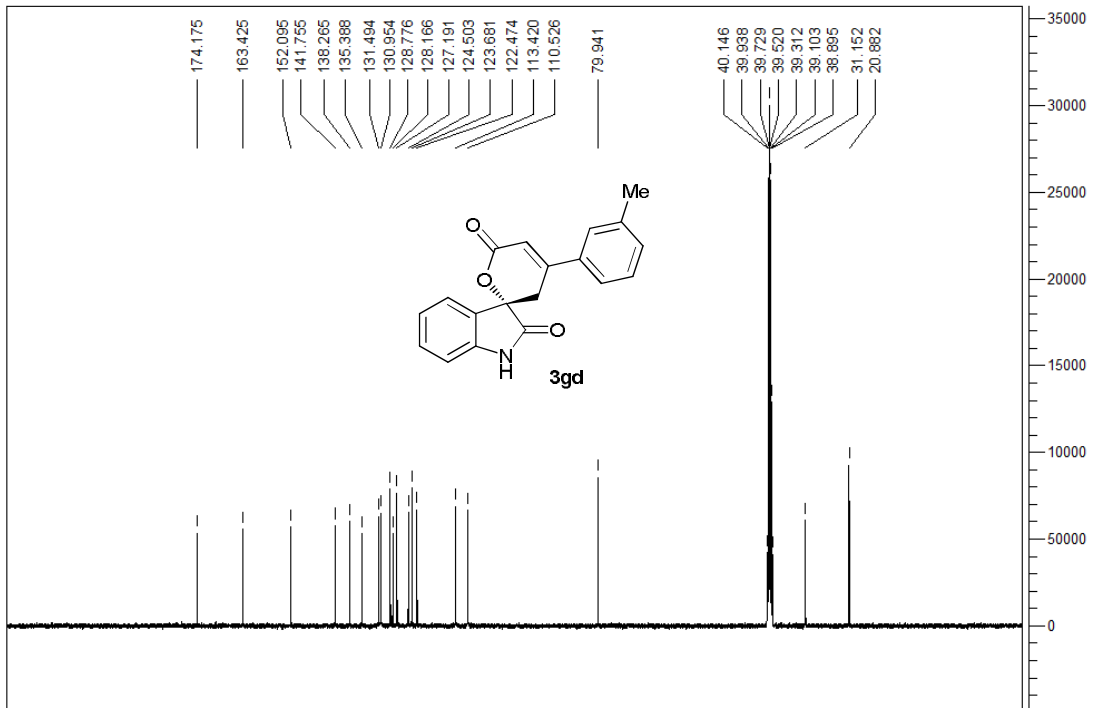

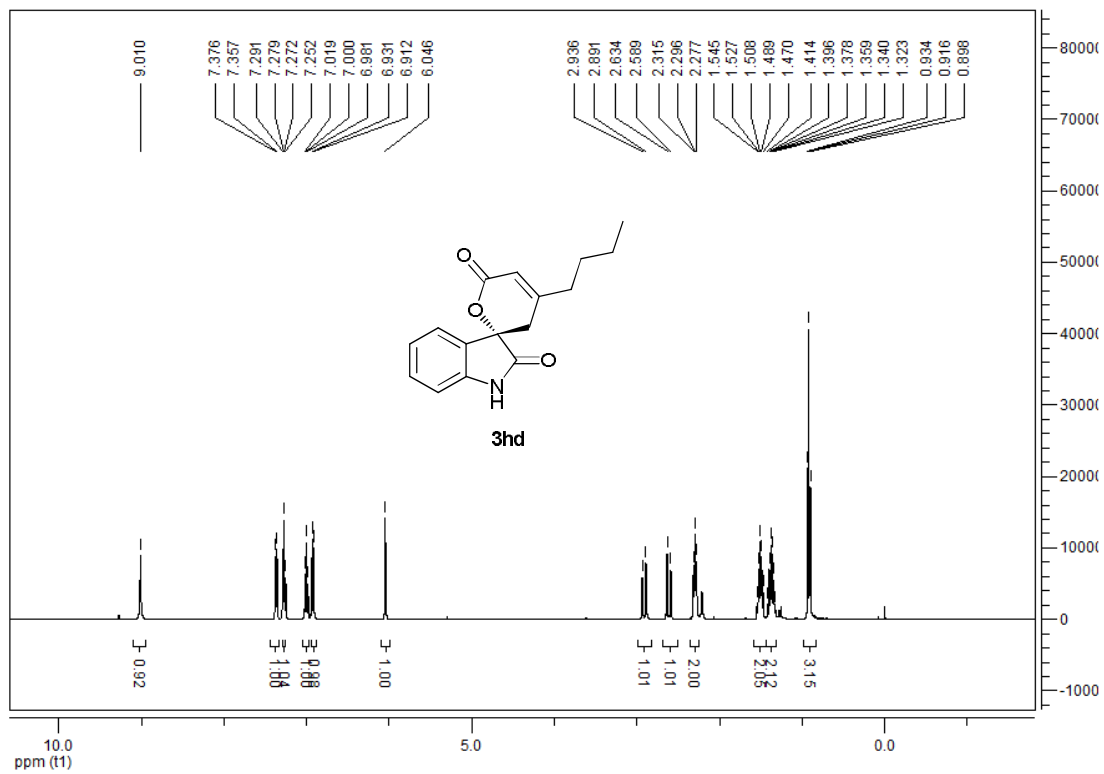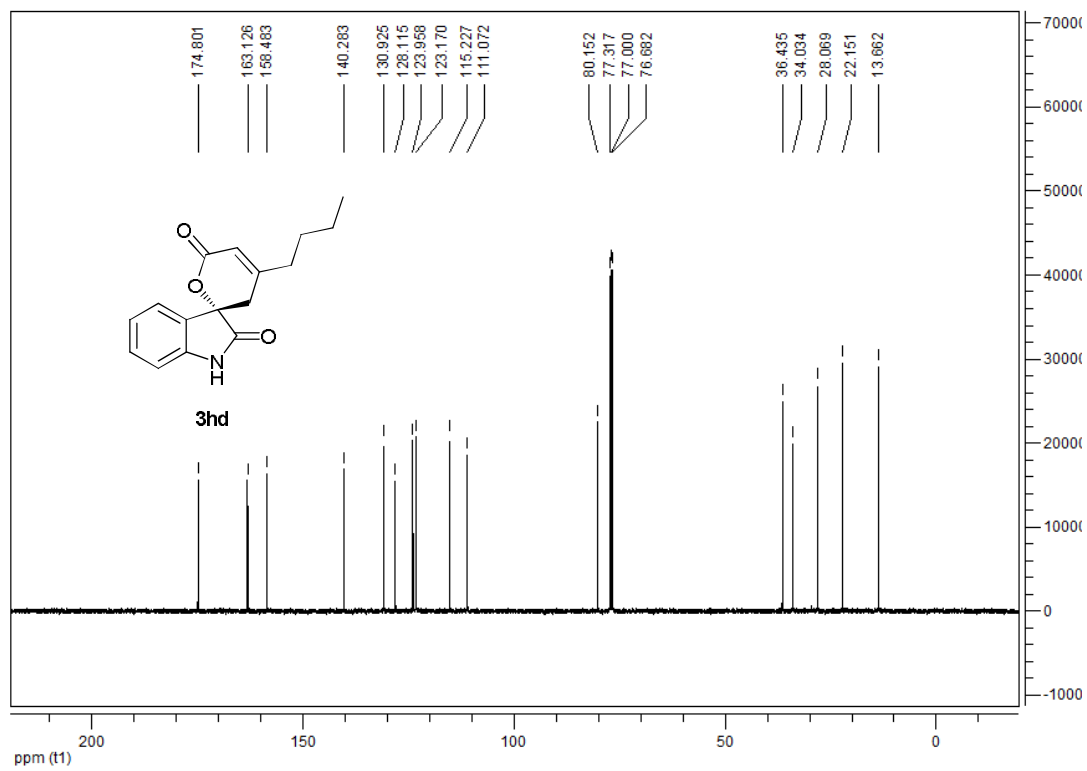

## 7. Copies of NMR Spectra of the the Substrates

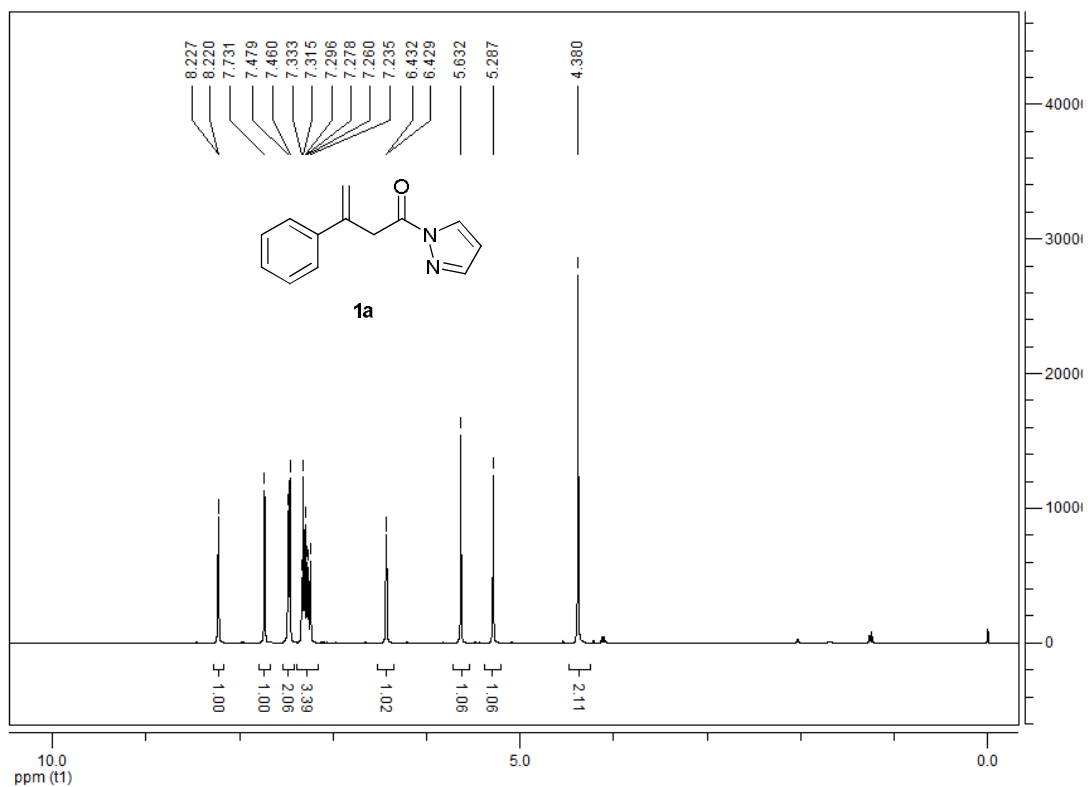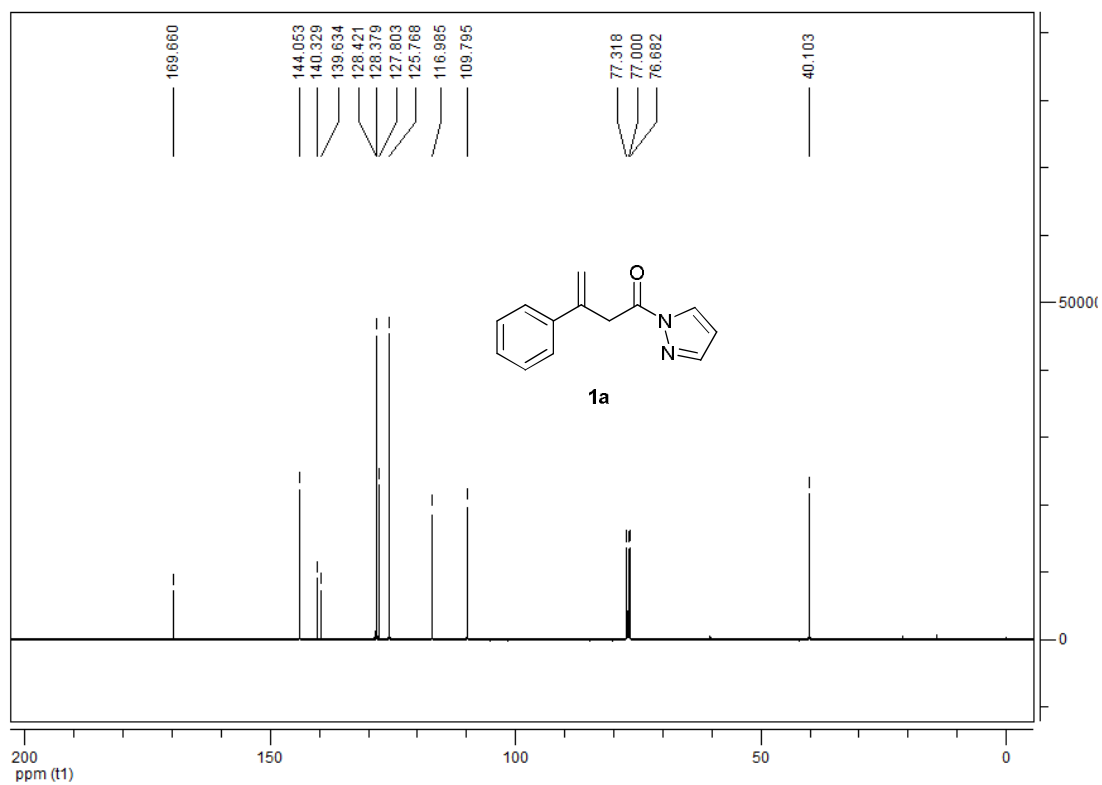

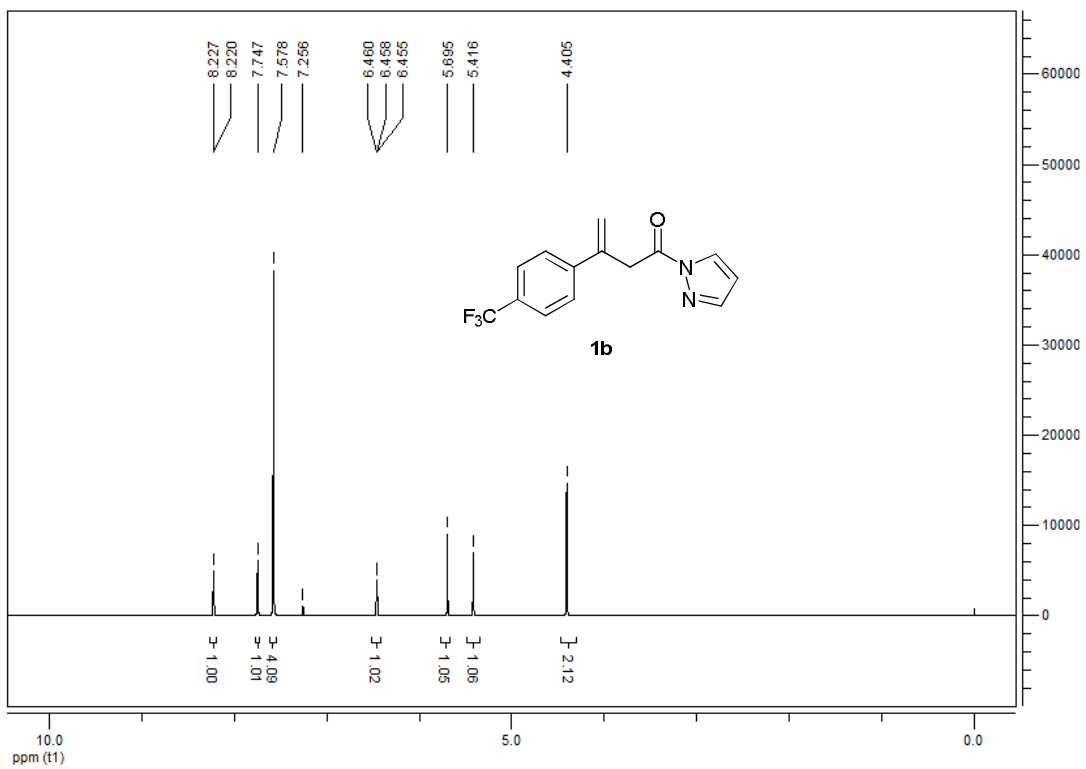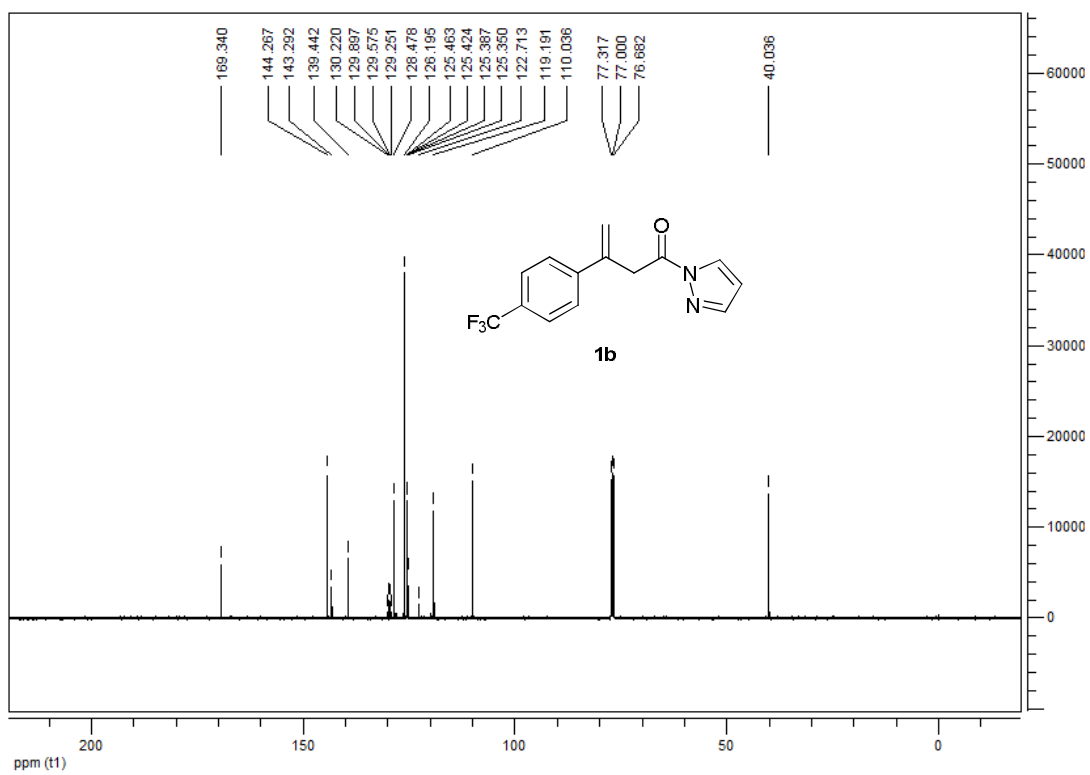

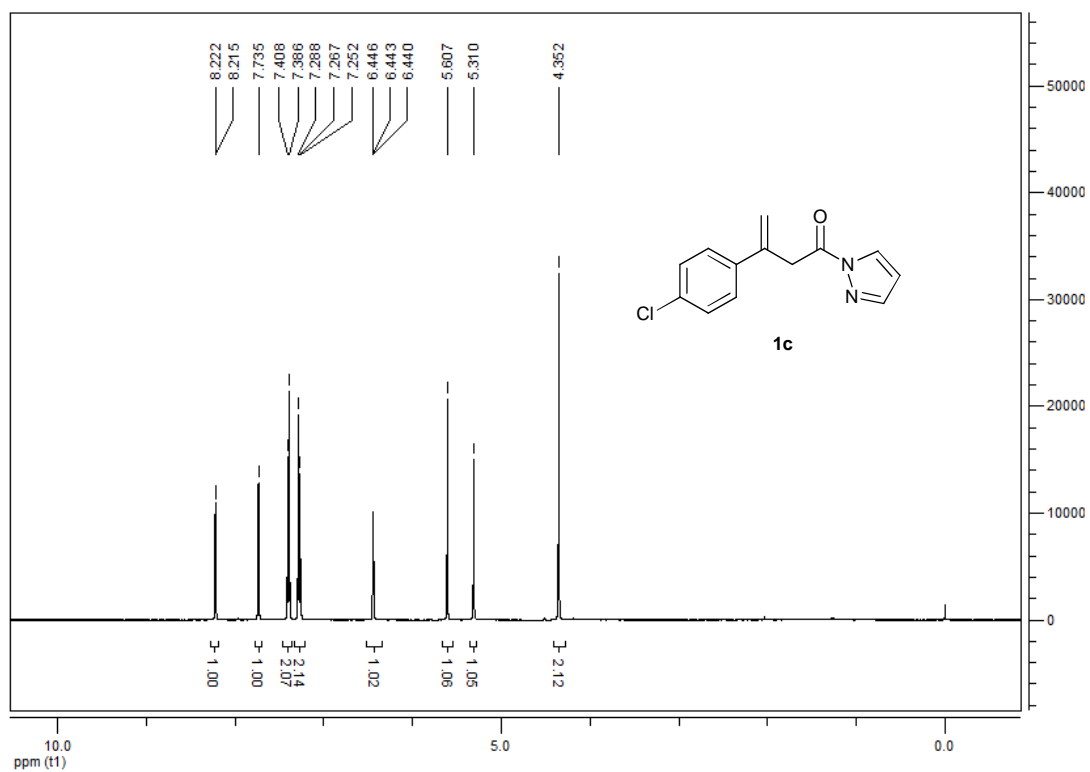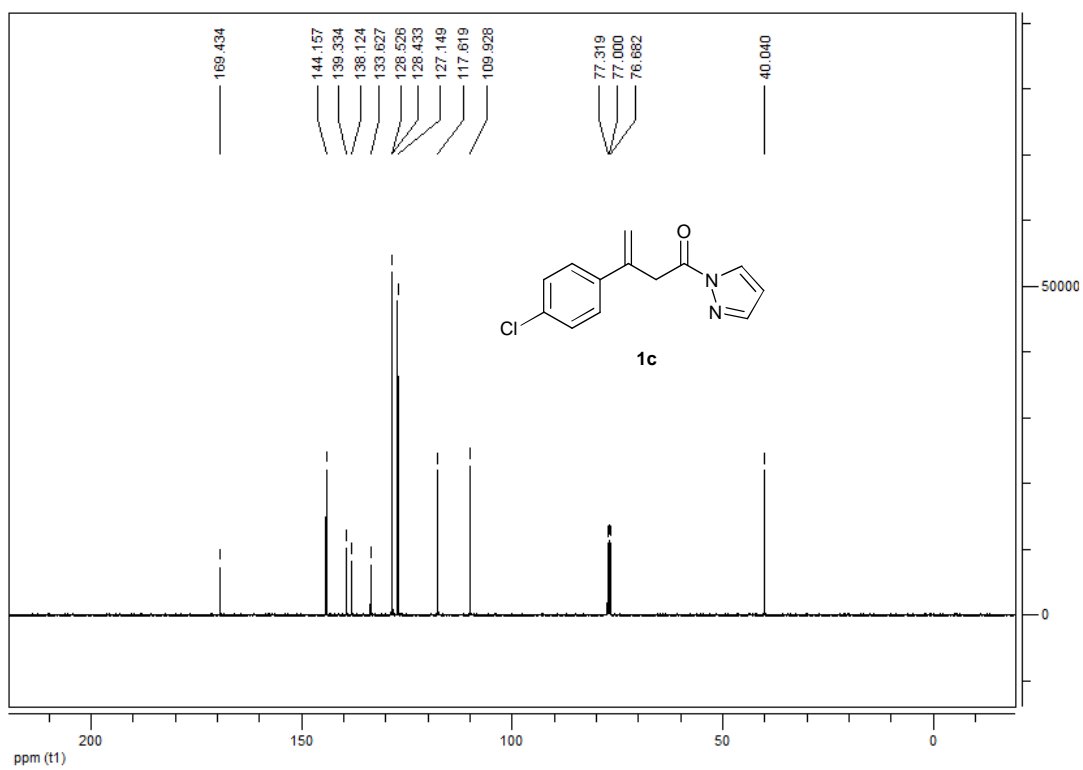



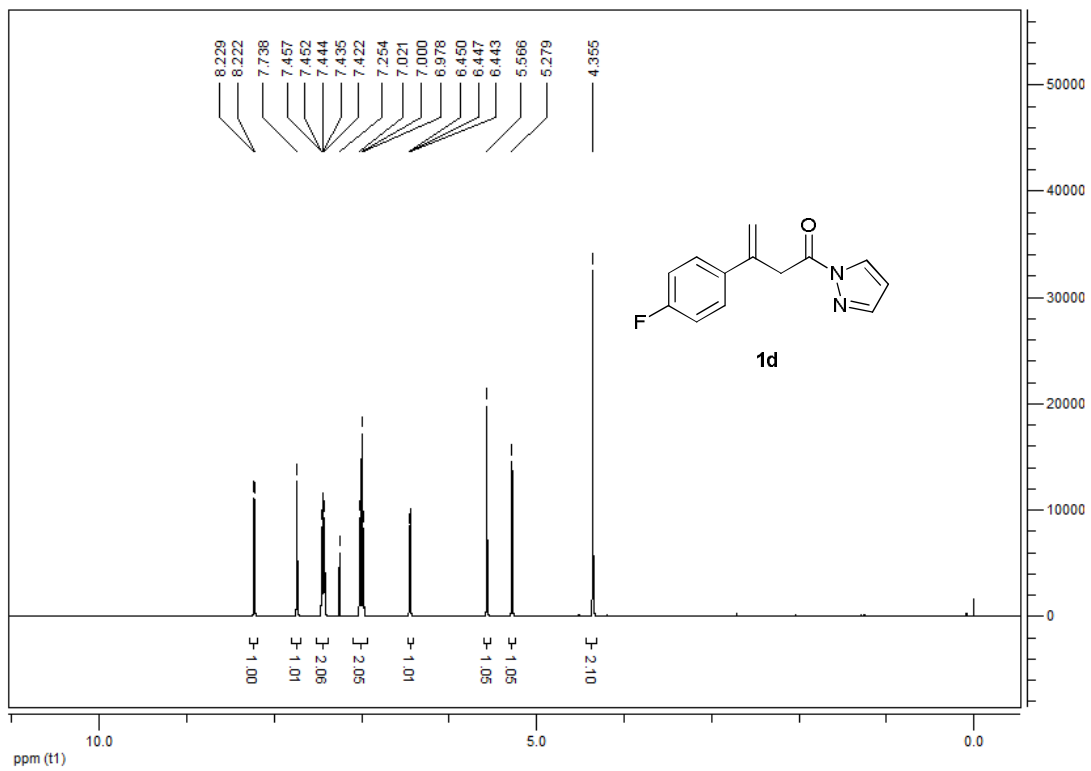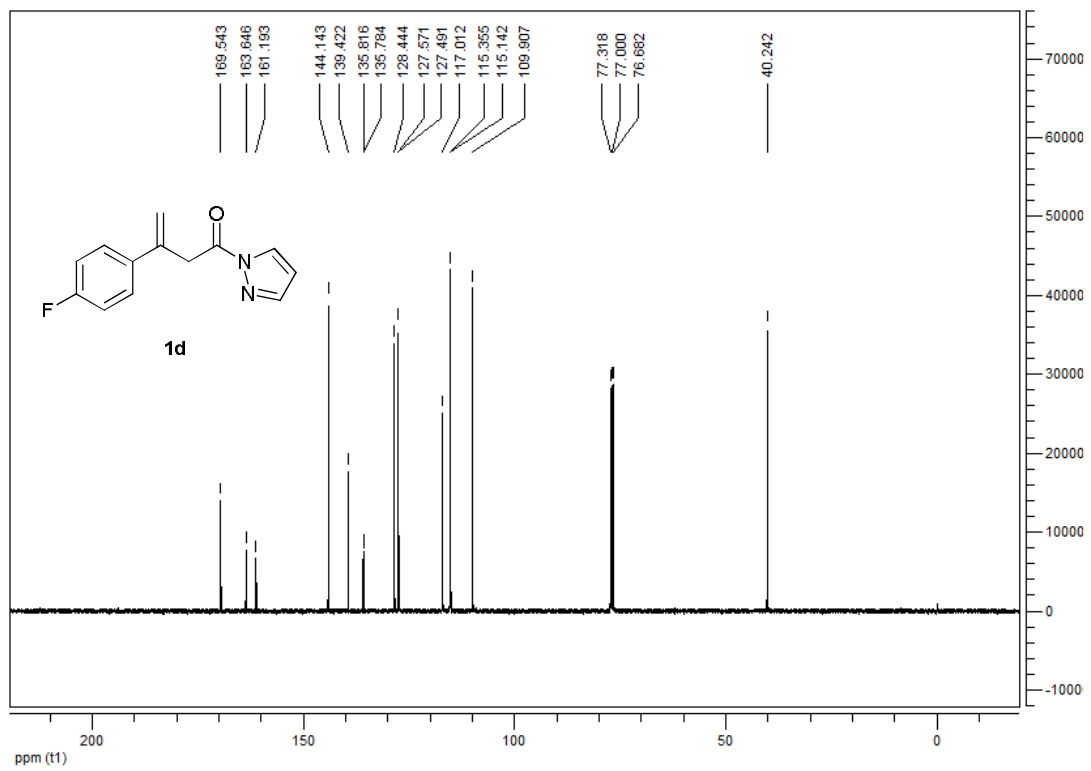

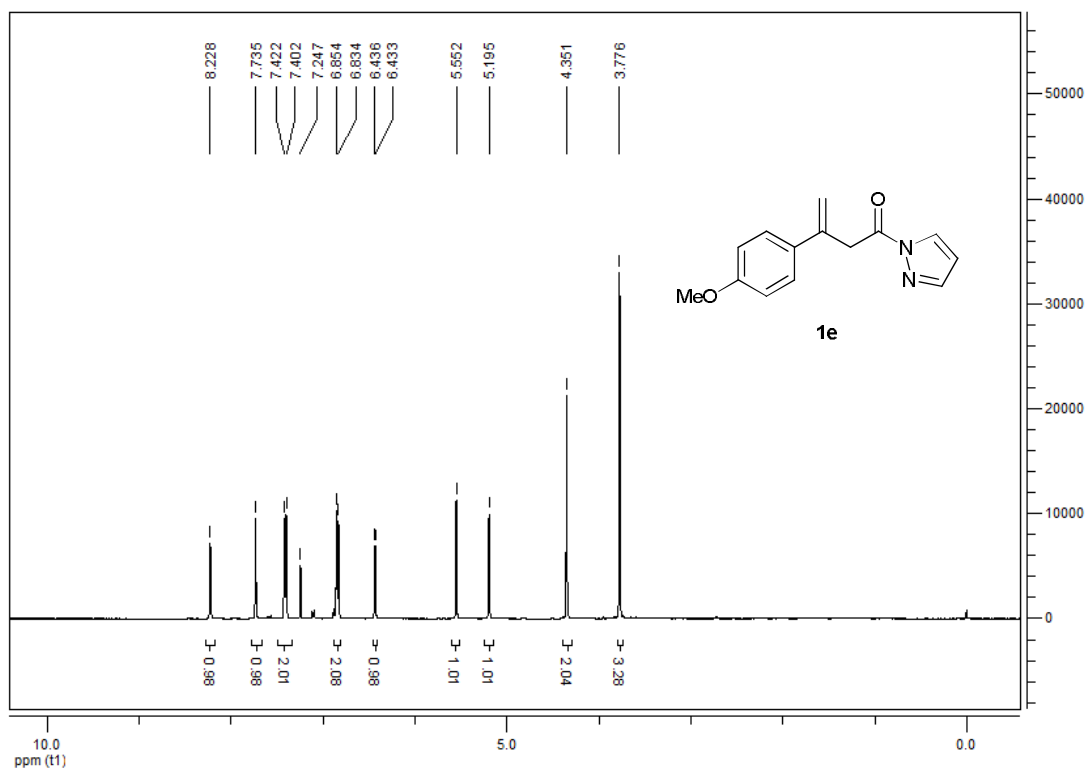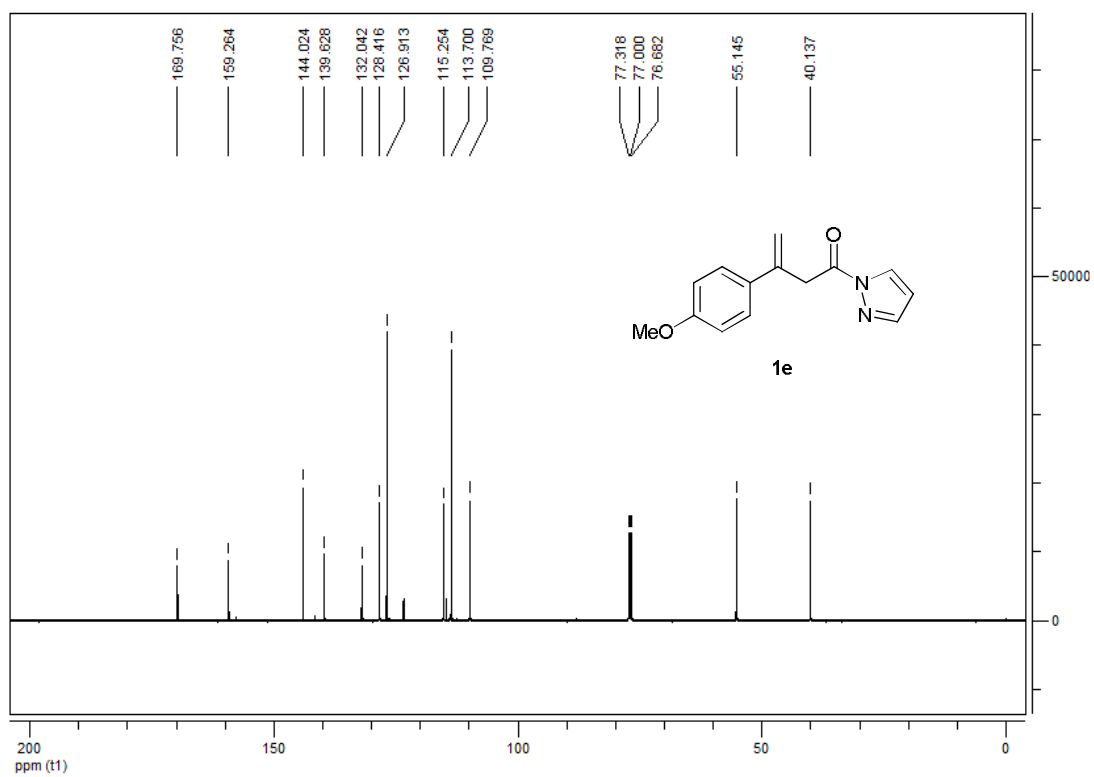

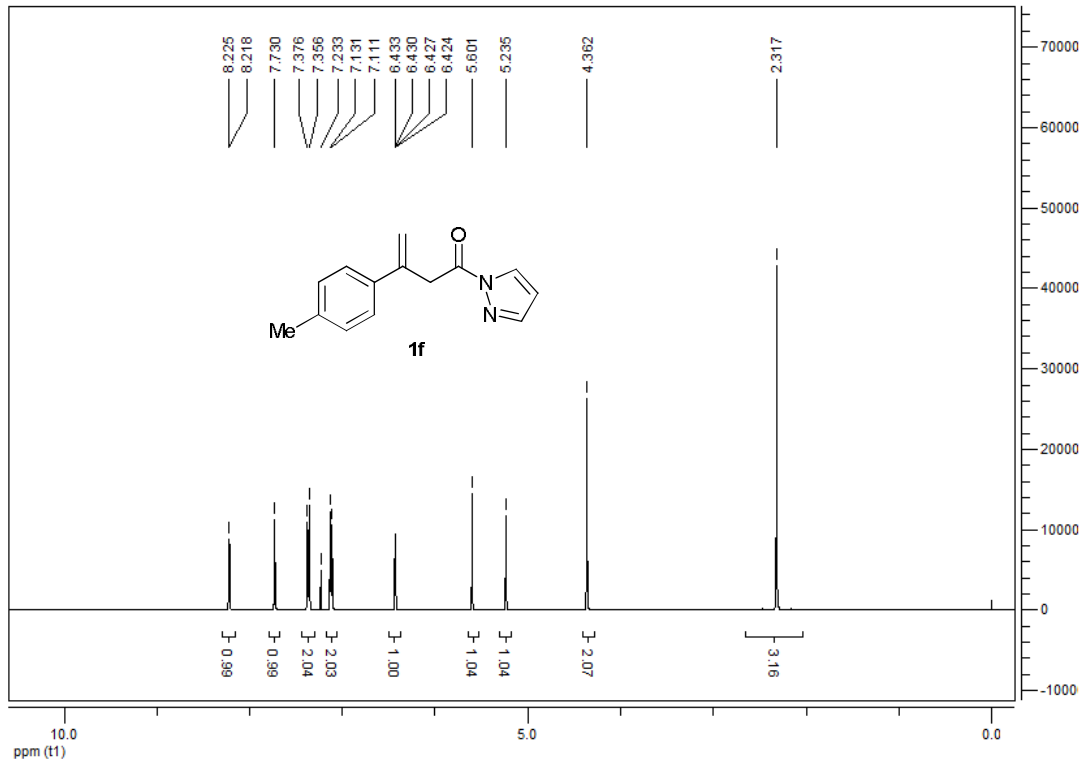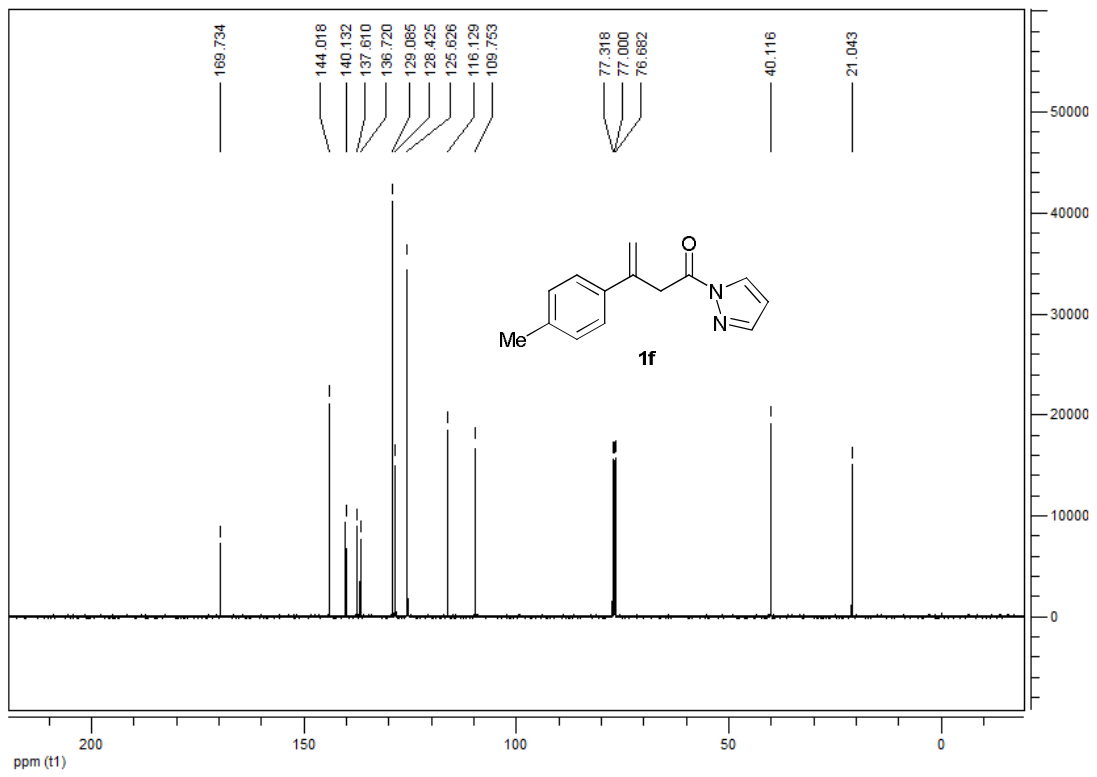

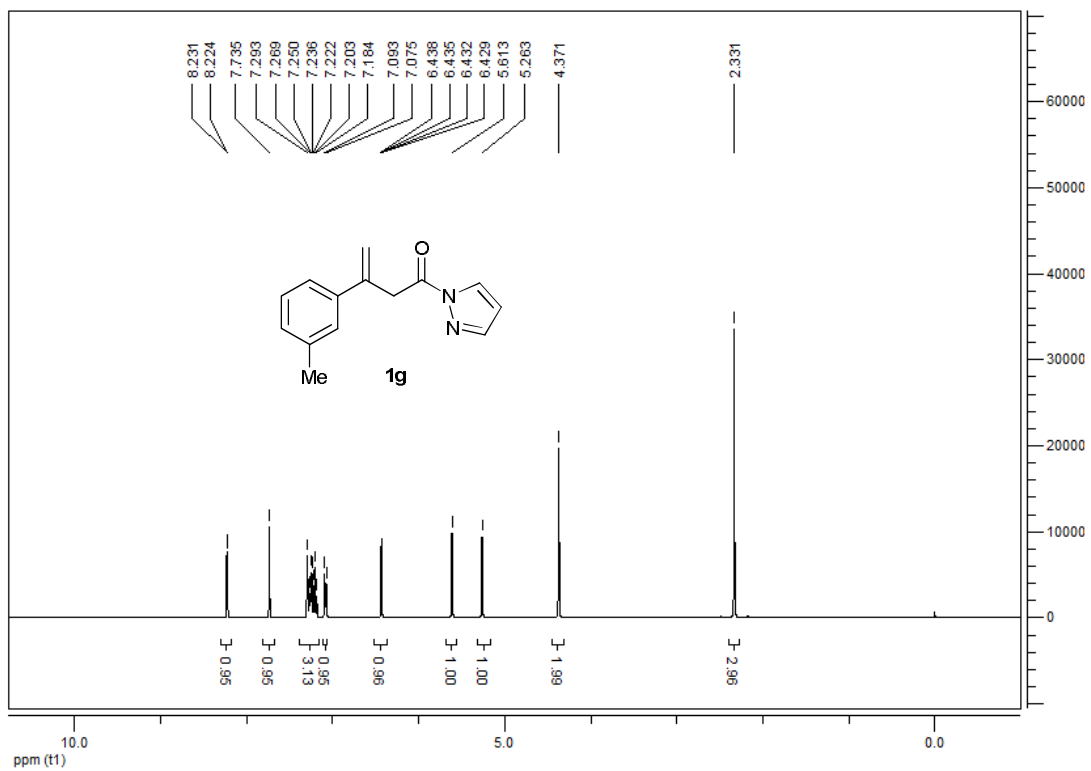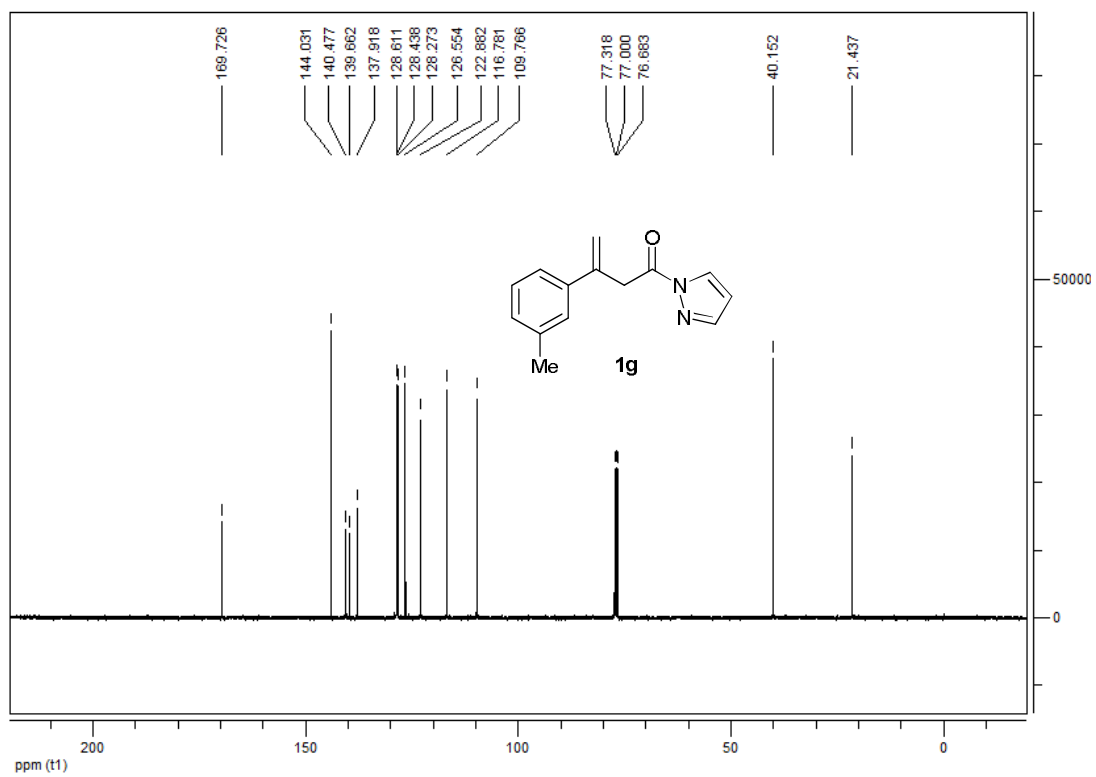

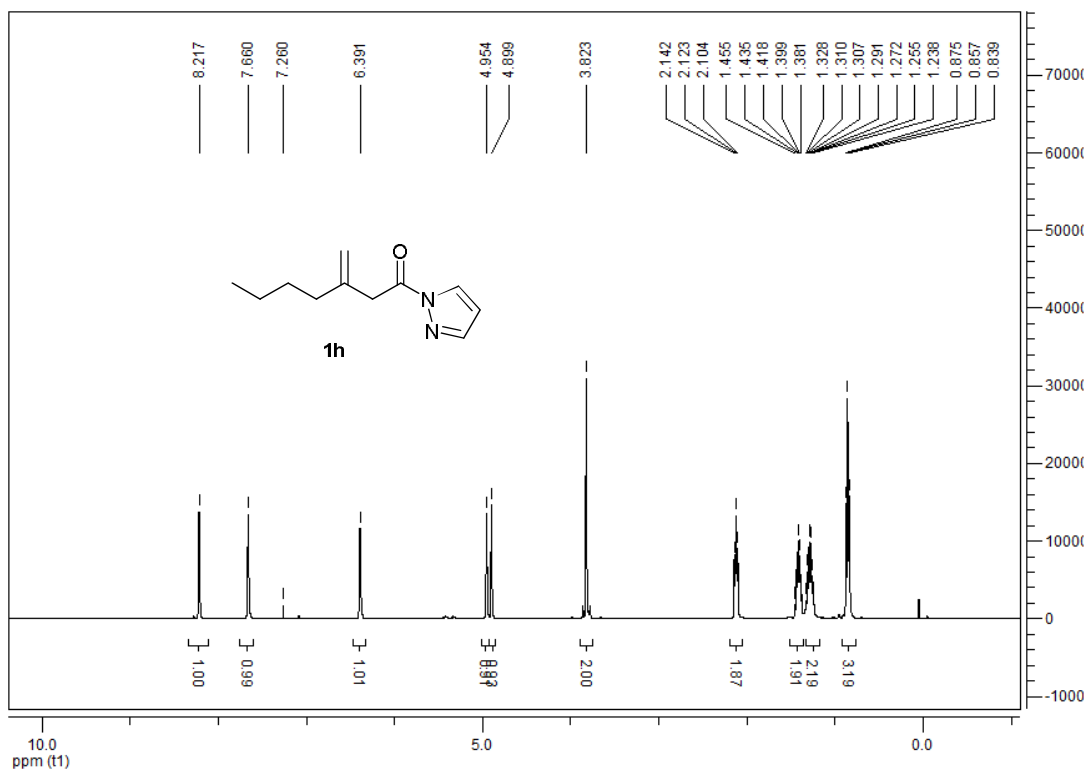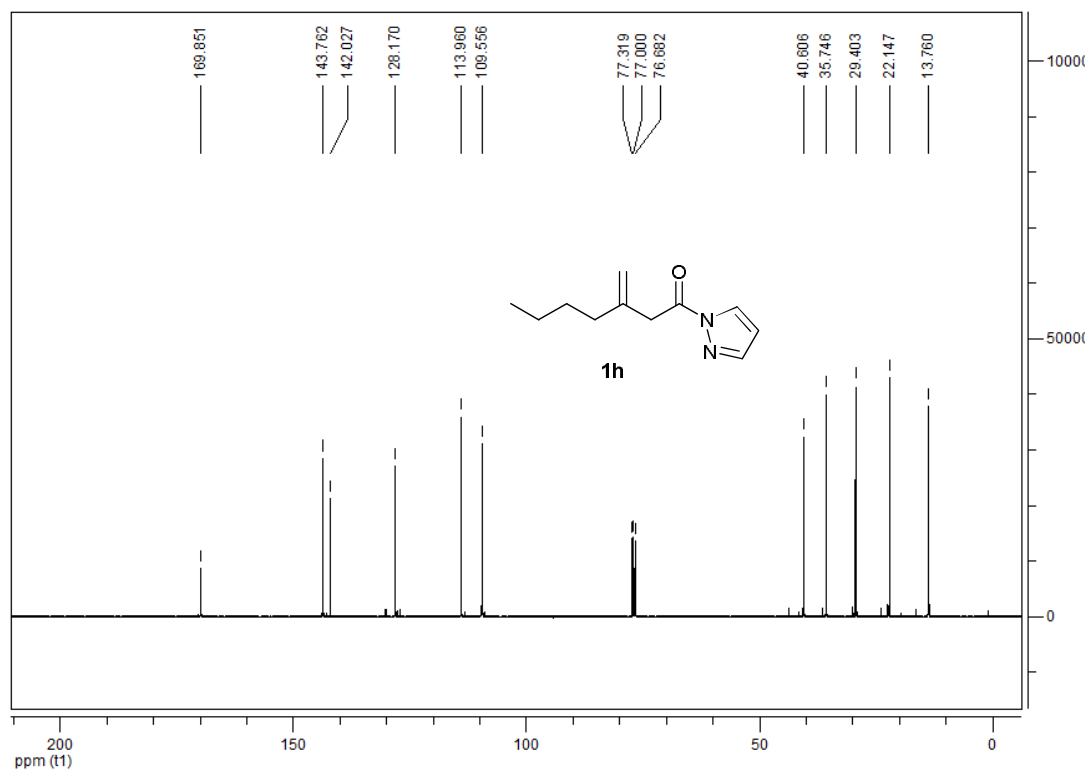

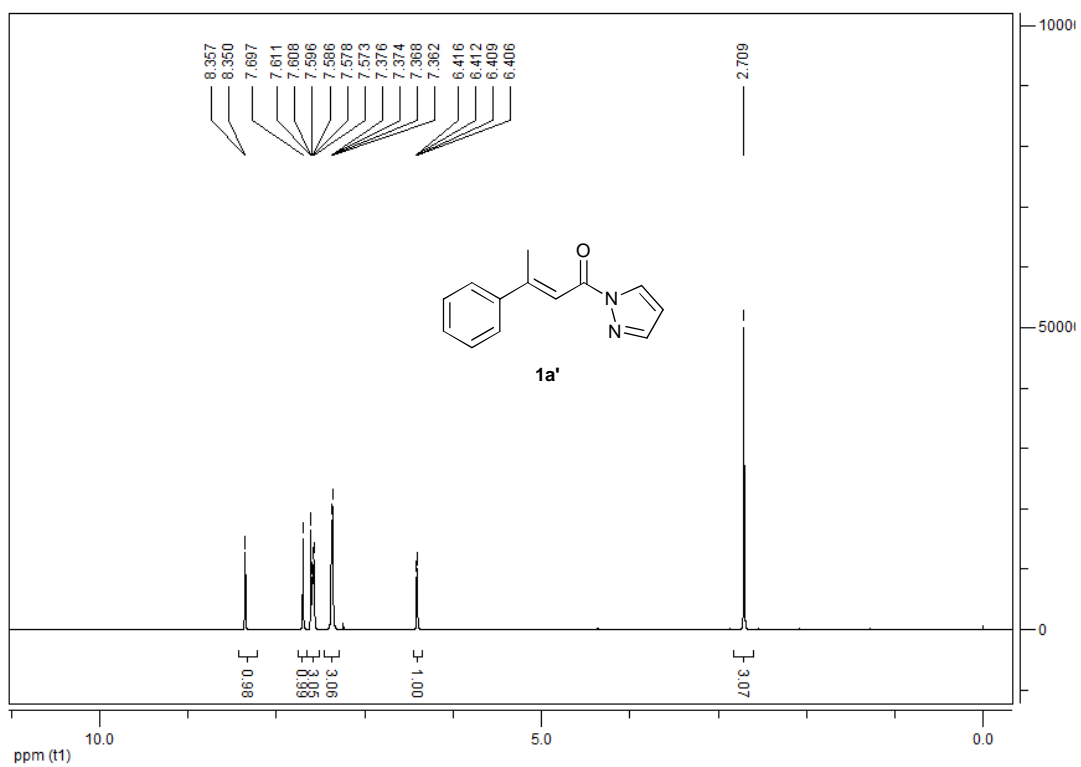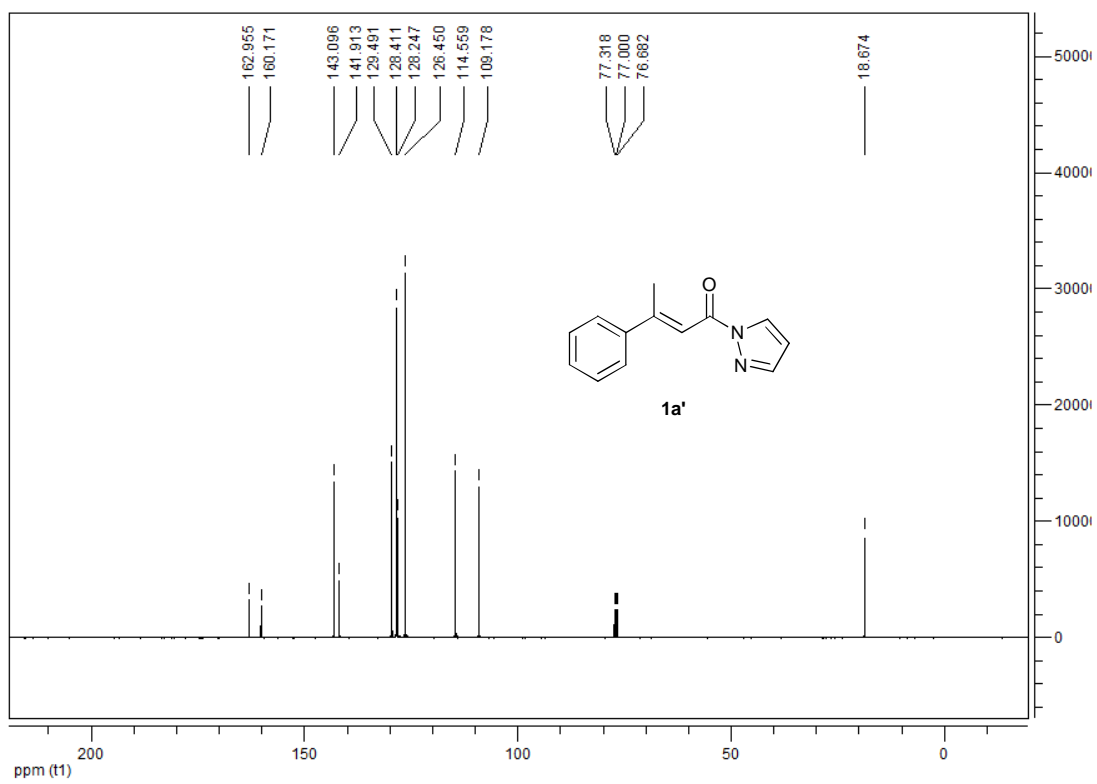

## 8. Copies of HPLC Spectra of the Products

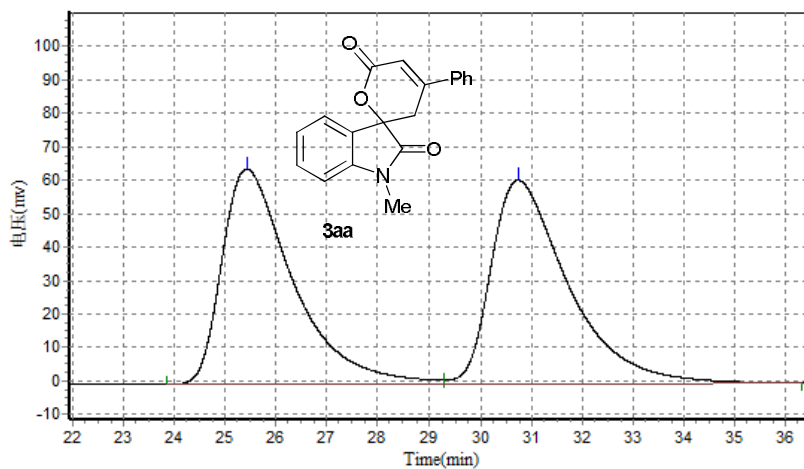

### Results

| Peak No.     | Peak ID | Ret Time | Height     | Area         | Conc.    |
|--------------|---------|----------|------------|--------------|----------|
| 1            |         | 25.423   | 64283.477  | 6259666.000  | 49.2683  |
| 2            |         | 30.740   | 60854.992  | 6445590.000  | 50.7317  |
| <b>Total</b> |         |          | 125138.469 | 12705256.000 | 100.0000 |

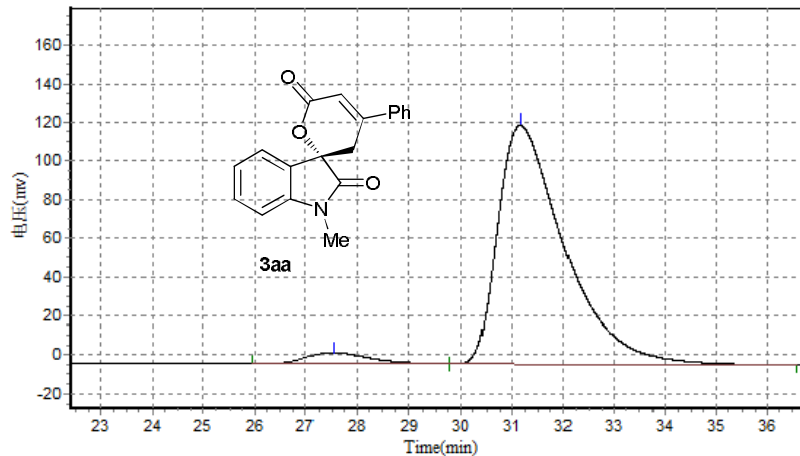

### Results

| Peak No.     | Peak ID | Ret Time | Height     | Area         | Conc.    |
|--------------|---------|----------|------------|--------------|----------|
| 1            |         | 27.532   | 5927.883   | 507569.563   | 4.3325   |
| 2            |         | 31.165   | 123544.539 | 11207894.000 | 95.6675  |
| <b>Total</b> |         |          | 129472.422 | 11715463.563 | 100.0000 |

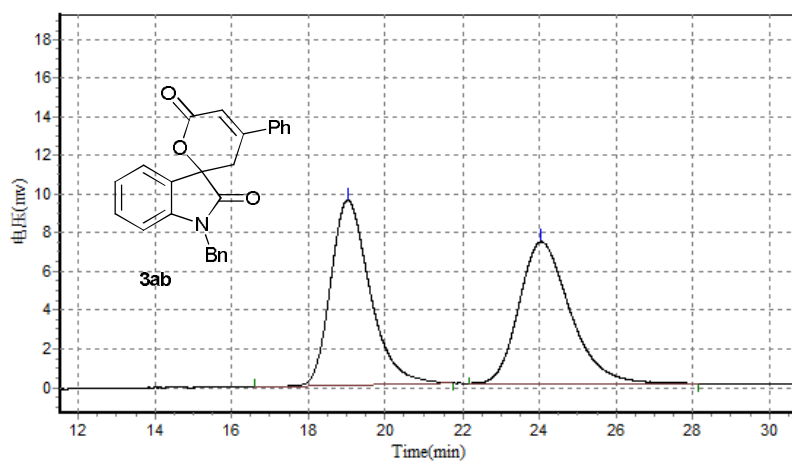

### Results

| Peak No.     | Peak ID | Ret Time | Height    | Area        | Conc.    |
|--------------|---------|----------|-----------|-------------|----------|
| 1            |         | 19.027   | 9569.344  | 681083.313  | 50.1323  |
| 2            |         | 24.038   | 7332.167  | 677488.688  | 49.8677  |
| <b>Total</b> |         |          | 16901.511 | 1358572.000 | 100.0000 |

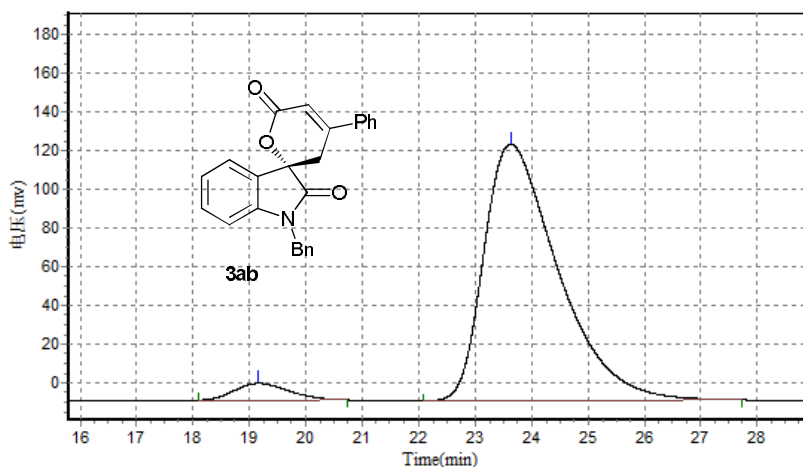

### Results

| Peak No.     | Peak ID | Ret Time | Height     | Area         | Conc.    |
|--------------|---------|----------|------------|--------------|----------|
| 1            |         | 19.168   | 8604.880   | 578129.625   | 4.5689   |
| 2            |         | 23.620   | 132085.656 | 12075368.000 | 95.4311  |
| <b>Total</b> |         |          | 140690.536 | 12653497.625 | 100.0000 |



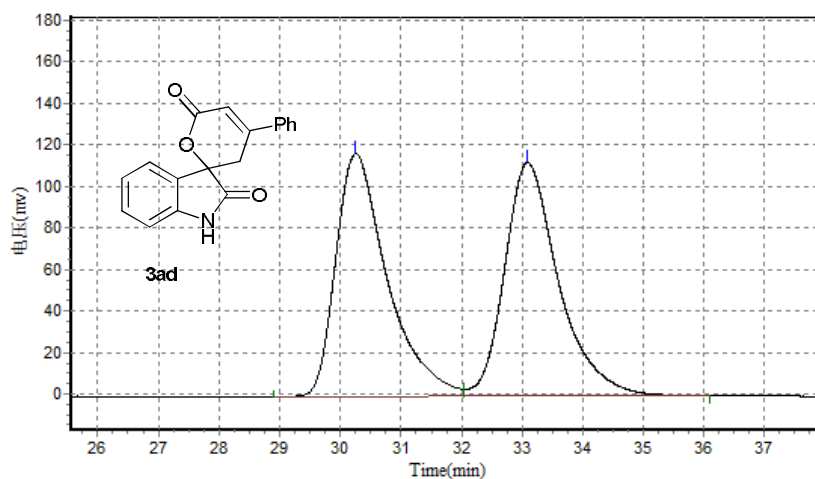

### Results

| Peak No.     | Peak ID | Ret Time | Height     | Area         | Conc.    |
|--------------|---------|----------|------------|--------------|----------|
| 1            |         | 30.262   | 116630.703 | 6876079.000  | 49.6043  |
| 2            |         | 33.082   | 112269.078 | 6985788.000  | 50.3957  |
| <b>Total</b> |         |          | 228899.781 | 13861867.000 | 100.0000 |

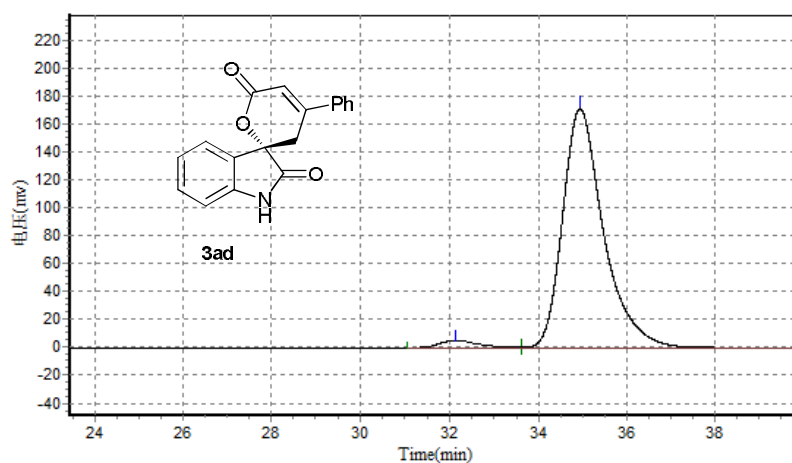

### Results

| Peak No.     | Peak ID | Ret Time | Height     | Area         | Conc.    |
|--------------|---------|----------|------------|--------------|----------|
| 1            |         | 32.123   | 5399.264   | 330483.500   | 2.9153   |
| 2            |         | 34.948   | 171162.313 | 11005803.000 | 97.0847  |
| <b>Total</b> |         |          | 176561.576 | 11336286.500 | 100.0000 |

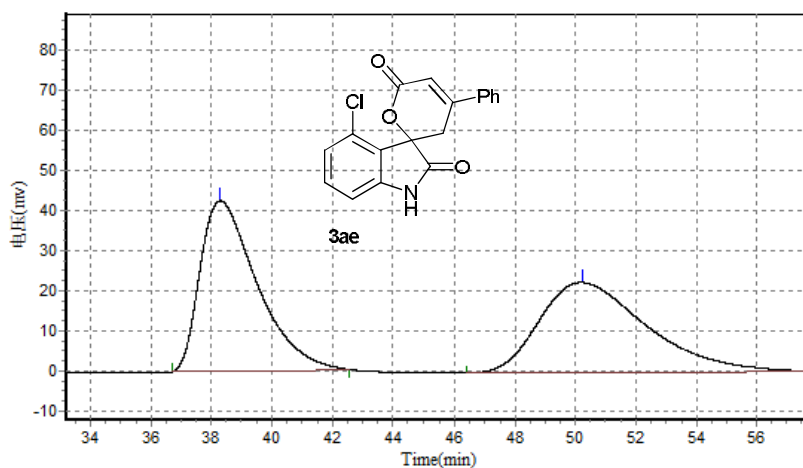

### Results

| Peak No.     | Peak ID | Ret Time | Height    | Area         | Conc.    |
|--------------|---------|----------|-----------|--------------|----------|
| 1            |         | 38.293   | 42360.832 | 5526875.500  | 50.1769  |
| 2            |         | 50.208   | 22386.371 | 5487906.000  | 49.8231  |
| <b>Total</b> |         |          | 64747.203 | 11014781.500 | 100.0000 |

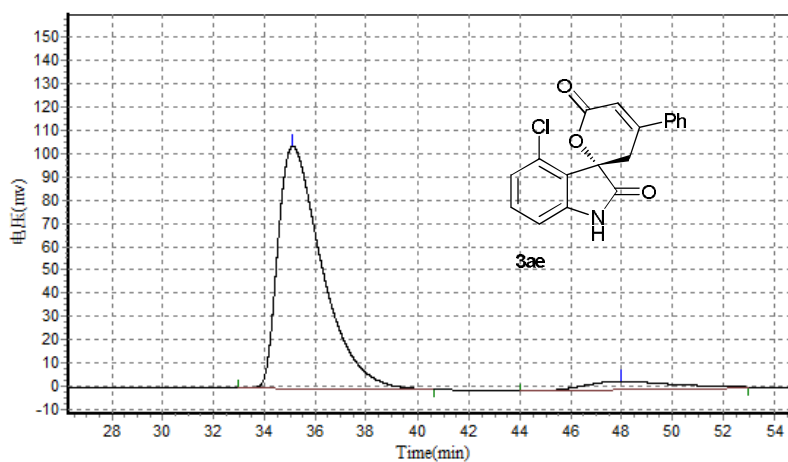

### Results

| Peak No.     | Peak ID | Ret Time | Height     | Area         | Conc.    |
|--------------|---------|----------|------------|--------------|----------|
| 1            |         | 35.117   | 104106.352 | 12506568.000 | 94.3455  |
| 2            |         | 48.003   | 3437.008   | 749569.188   | 5.6545   |
| <b>Total</b> |         |          | 107543.360 | 13256137.188 | 100.0000 |

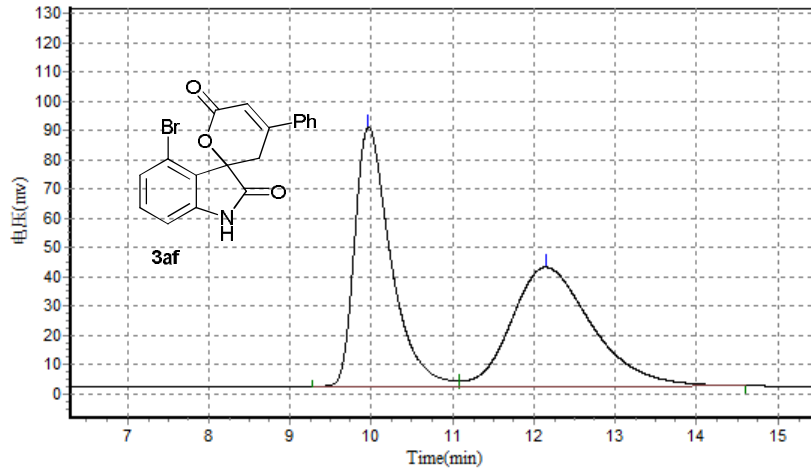

### Results

| Peak No.     | Peak ID | Ret Time | Height     | Area        | Conc.    |
|--------------|---------|----------|------------|-------------|----------|
| 1            |         | 9.973    | 88795.227  | 2745785.250 | 49.5894  |
| 2            |         | 12.143   | 40713.438  | 2791254.750 | 50.4106  |
| <b>Total</b> |         |          | 129508.664 | 5537040.000 | 100.0000 |

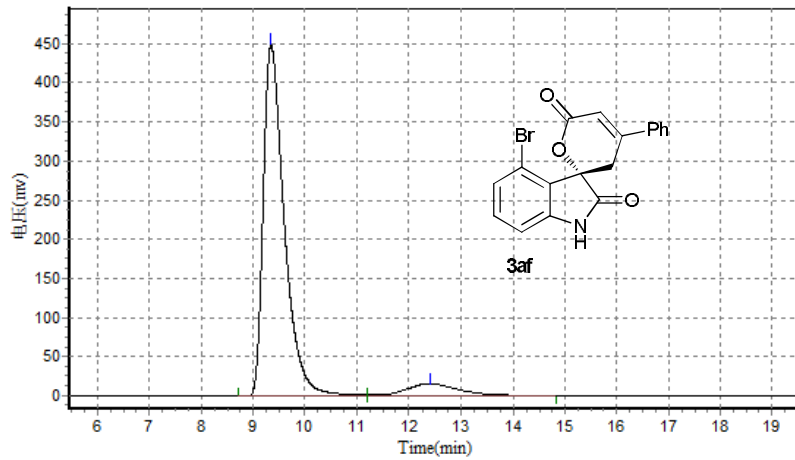

### Results

| Peak No.     | Peak ID | Ret Time | Height     | Area         | Conc.    |
|--------------|---------|----------|------------|--------------|----------|
| 1            |         | 9.352    | 448155.250 | 12630039.000 | 92.1243  |
| 2            |         | 12.390   | 15388.225  | 1079740.125  | 7.8757   |
| <b>Total</b> |         |          | 463543.475 | 13709779.125 | 100.0000 |

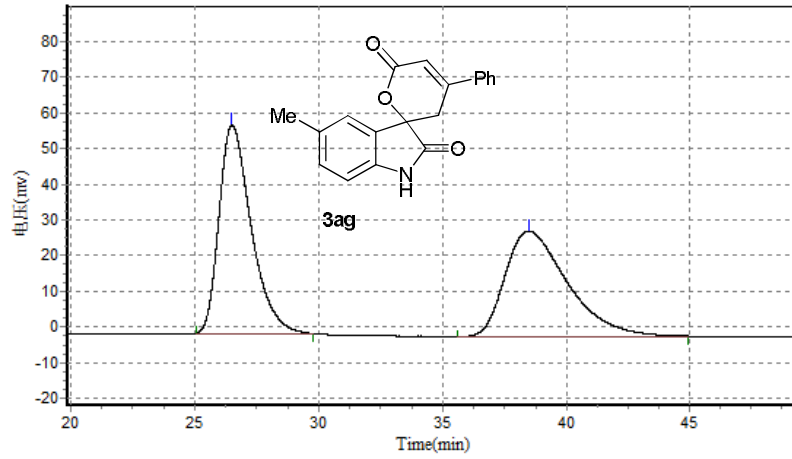

### Results

| Peak No.     | Peak ID | Ret Time | Height    | Area         | Conc.    |
|--------------|---------|----------|-----------|--------------|----------|
| 1            |         | 26.503   | 58588.211 | 5298666.500  | 50.6718  |
| 2            |         | 38.480   | 29557.637 | 5158166.000  | 49.3282  |
| <b>Total</b> |         |          | 88145.848 | 10456832.500 | 100.0000 |

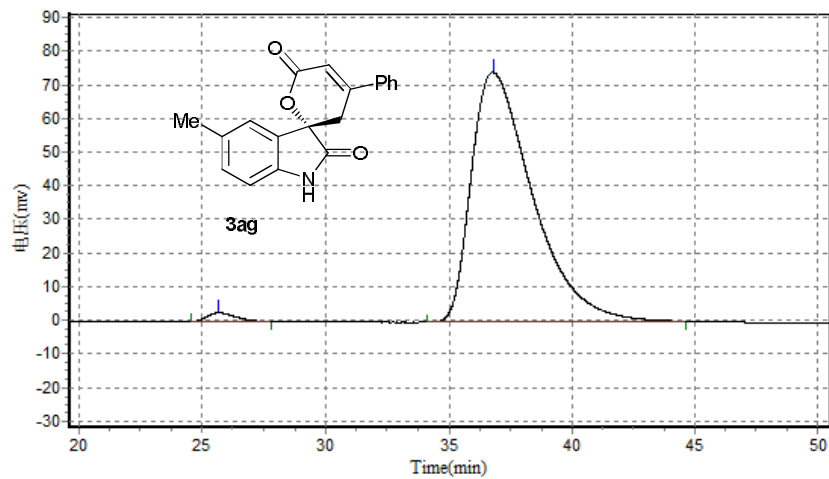

### Results

| Peak No.     | Peak ID | Ret Time | Height    | Area         | Conc.    |
|--------------|---------|----------|-----------|--------------|----------|
| 1            |         | 25.678   | 2686.233  | 225917.906   | 1.7215   |
| 2            |         | 36.785   | 74114.477 | 12897374.000 | 98.2785  |
| <b>Total</b> |         |          | 76800.709 | 13123291.906 | 100.0000 |

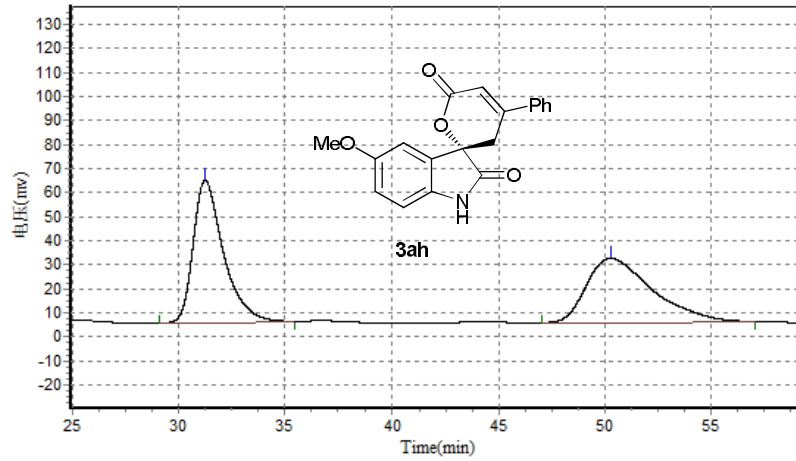

### Results

| Peak No.     | Peak ID | Ret Time | Height    | Area         | Conc.    |
|--------------|---------|----------|-----------|--------------|----------|
| 1            |         | 31.230   | 59315.523 | 5866317.500  | 50.6228  |
| 2            |         | 50.267   | 26623.018 | 5721965.000  | 49.3772  |
| <b>Total</b> |         |          | 85938.541 | 11588282.500 | 100.0000 |

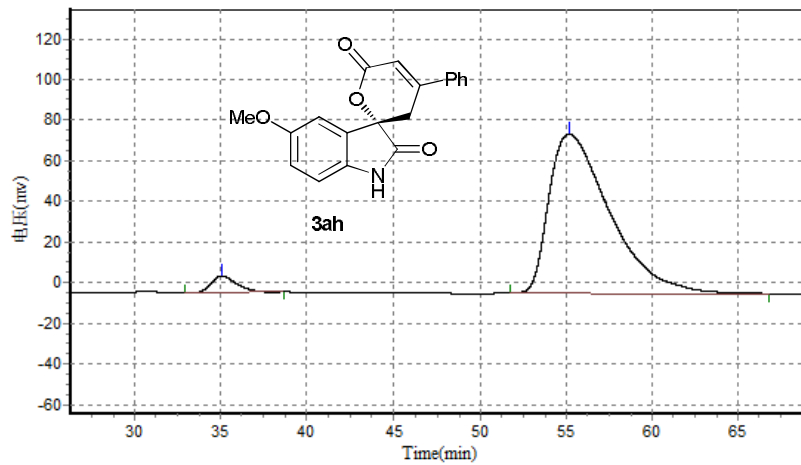

### Results

| Peak No.     | Peak ID | Ret Time | Height    | Area         | Conc.    |
|--------------|---------|----------|-----------|--------------|----------|
| 1            |         | 35.070   | 8221.466  | 820627.688   | 4.1122   |
| 2            |         | 55.193   | 78173.711 | 19135268.000 | 95.8878  |
| <b>Total</b> |         |          | 86395.177 | 19955895.688 | 100.0000 |

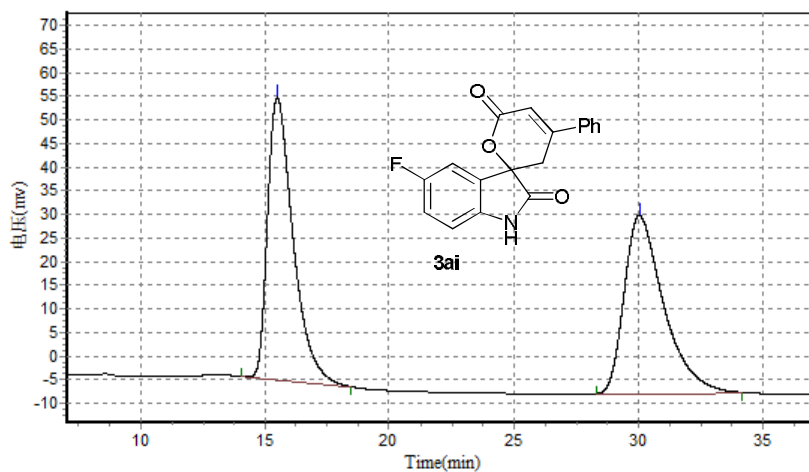

**Results**

| Peak No.     | Peak ID | Ret Time | Height    | Area        | Conc.    |
|--------------|---------|----------|-----------|-------------|----------|
| 1            |         | 15.503   | 59718.336 | 4272878.500 | 50.6095  |
| 2            |         | 30.045   | 37720.148 | 4169966.750 | 49.3905  |
| <b>Total</b> |         |          | 97438.484 | 8442845.250 | 100.0000 |

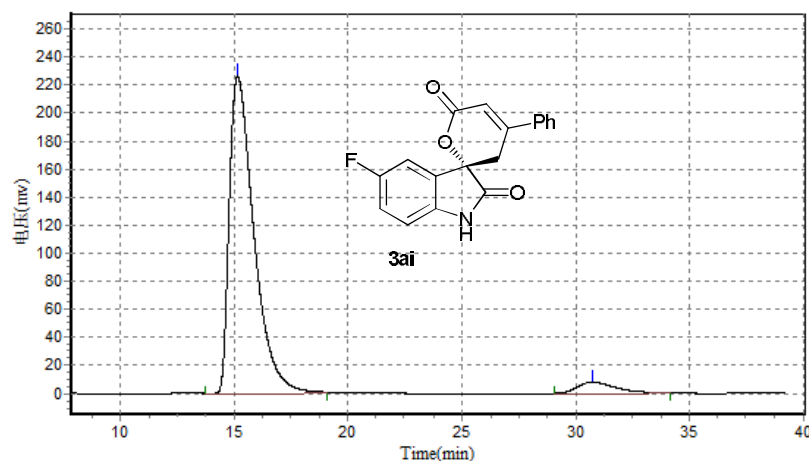

**Results**

| Peak No.     | Peak ID | Ret Time | Height     | Area         | Conc.    |
|--------------|---------|----------|------------|--------------|----------|
| 1            |         | 15.168   | 226079.406 | 16983002.000 | 94.8085  |
| 2            |         | 30.728   | 8041.277   | 929949.563   | 5.1915   |
| <b>Total</b> |         |          | 234120.683 | 17912951.563 | 100.0000 |

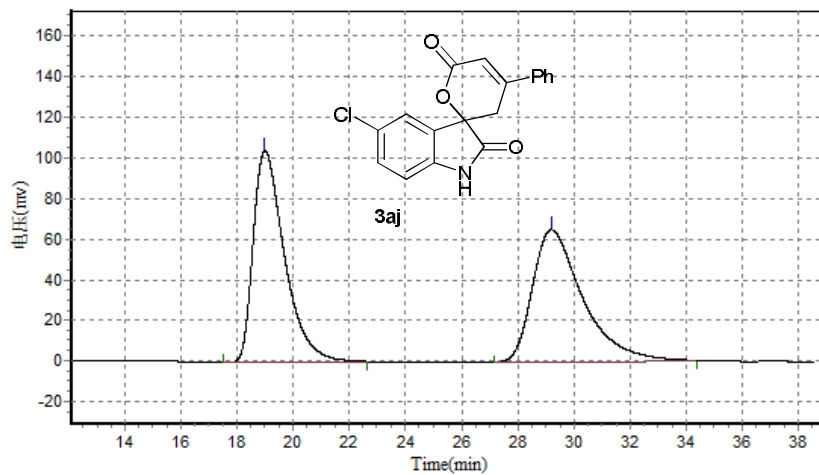

### Results

| Peak No.     | Peak ID | Ret Time | Height     | Area         | Conc.    |
|--------------|---------|----------|------------|--------------|----------|
| 1            |         | 18.990   | 104296.086 | 8084320.000  | 50.0585  |
| 2            |         | 29.177   | 64900.984  | 8065422.500  | 49.9415  |
| <b>Total</b> |         |          | 169197.070 | 16149742.500 | 100.0000 |

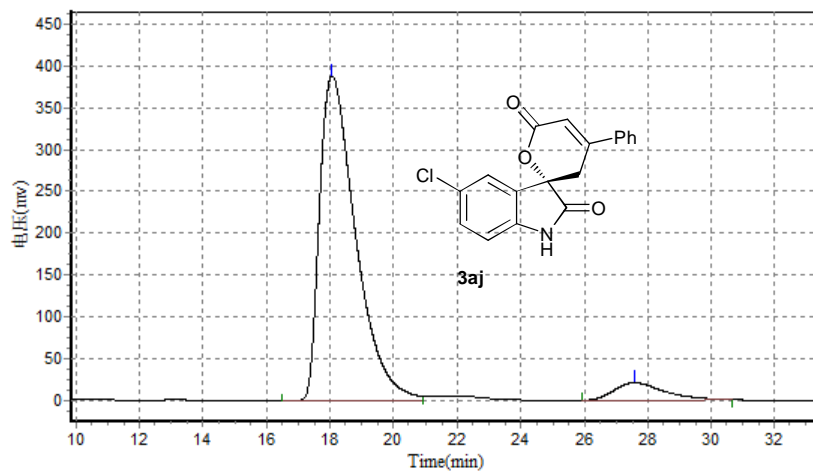

### Results

| Peak No.     | Peak ID | Ret Time | Height     | Area         | Conc.    |
|--------------|---------|----------|------------|--------------|----------|
| 1            |         | 18.073   | 387834.563 | 30642214.000 | 93.1196  |
| 2            |         | 27.568   | 20752.867  | 2264084.000  | 6.8804   |
| <b>Total</b> |         |          | 408587.430 | 32906298.000 | 100.0000 |

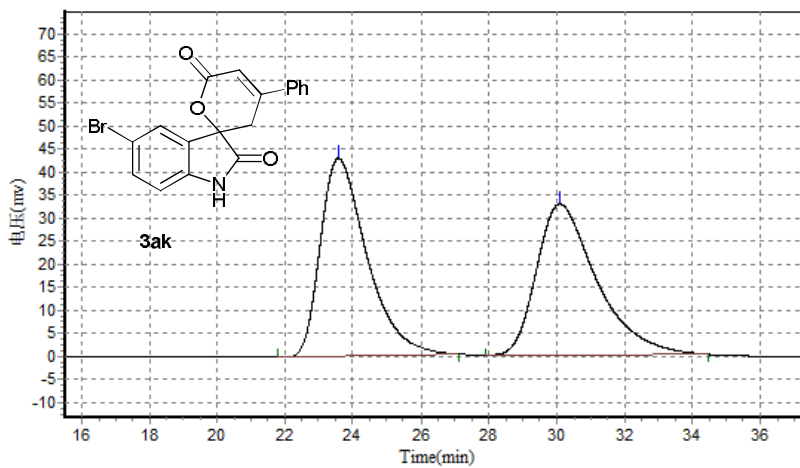

### Results

| Peak No.     | Peak ID | Ret Time | Height    | Area        | Conc.    |
|--------------|---------|----------|-----------|-------------|----------|
| 1            |         | 23.583   | 42890.621 | 4087179.750 | 50.2472  |
| 2            |         | 30.083   | 32763.549 | 4046968.500 | 49.7528  |
| <b>Total</b> |         |          | 75654.170 | 8134148.250 | 100.0000 |

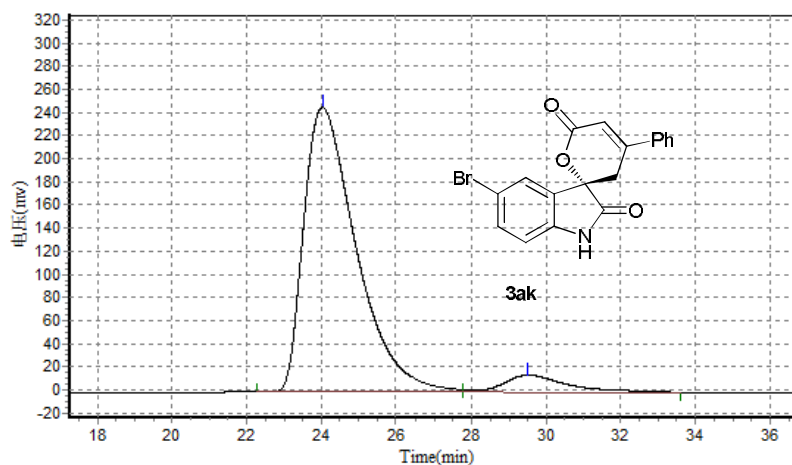

### Results

| Peak No.     | Peak ID | Ret Time | Height     | Area         | Conc.    |
|--------------|---------|----------|------------|--------------|----------|
| 1            |         | 24.038   | 245629.688 | 24008240.000 | 93.1927  |
| 2            |         | 29.515   | 14745.289  | 1753693.125  | 6.8073   |
| <b>Total</b> |         |          | 260374.977 | 25761933.125 | 100.0000 |



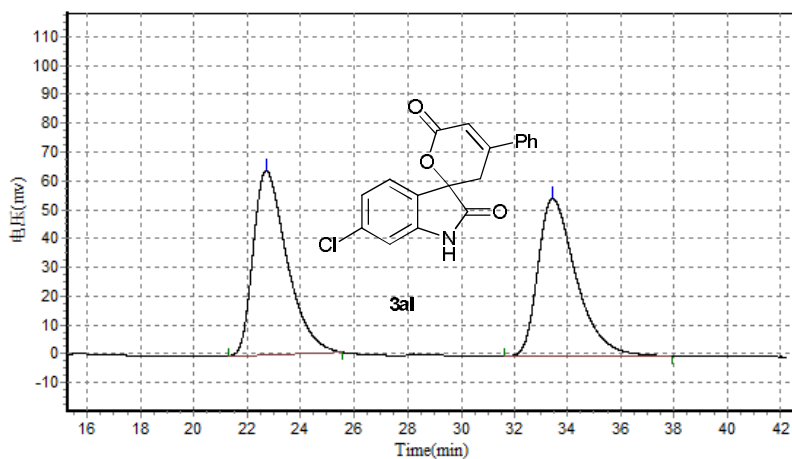

### Results

| Peak No.     | Peak ID | Ret Time | Height     | Area         | Conc.    |
|--------------|---------|----------|------------|--------------|----------|
| 1            |         | 22.718   | 63858.203  | 5614878.000  | 50.8699  |
| 2            |         | 33.437   | 54557.031  | 5422837.500  | 49.1301  |
| <b>Total</b> |         |          | 118415.234 | 11037715.500 | 100.0000 |

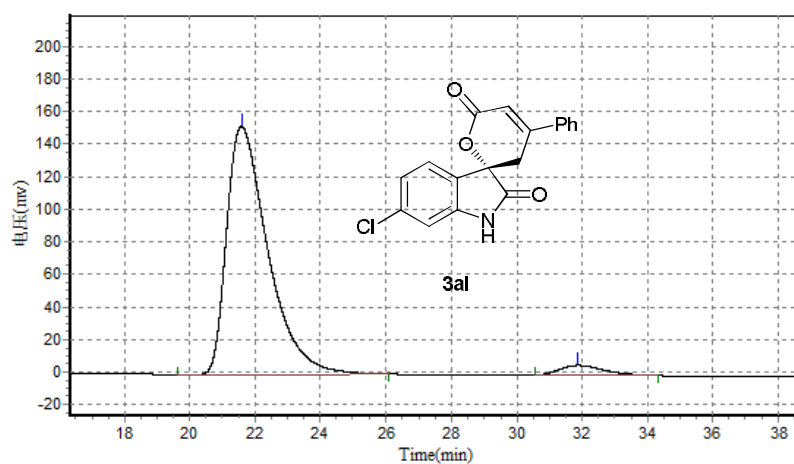

### Results

| Peak No.     | Peak ID | Ret Time | Height     | Area         | Conc.    |
|--------------|---------|----------|------------|--------------|----------|
| 1            |         | 21.583   | 152342.563 | 13347878.000 | 95.9035  |
| 2            |         | 31.863   | 6051.785   | 570151.688   | 4.0965   |
| <b>Total</b> |         |          | 158394.348 | 13918029.688 | 100.0000 |

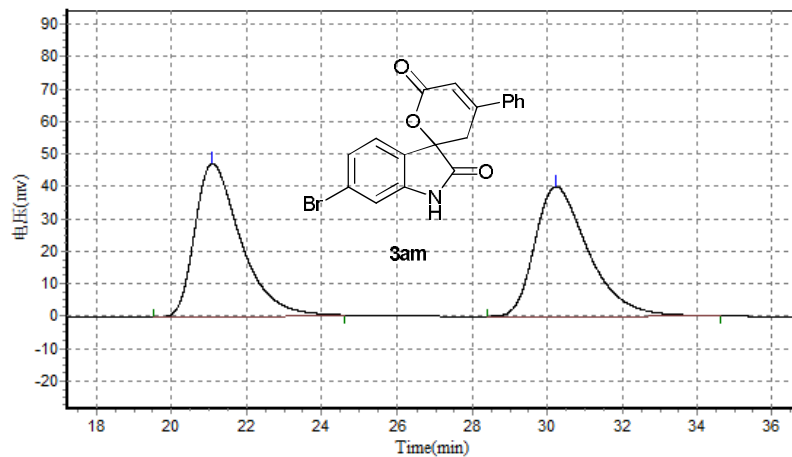

### Results

| Peak No.     | Peak ID | Ret Time | Height    | Area        | Conc.    |
|--------------|---------|----------|-----------|-------------|----------|
| 1            |         | 21.087   | 47209.508 | 3996776.000 | 50.2066  |
| 2            |         | 30.228   | 39983.508 | 3963884.500 | 49.7934  |
| <b>Total</b> |         |          | 87193.016 | 7960660.500 | 100.0000 |

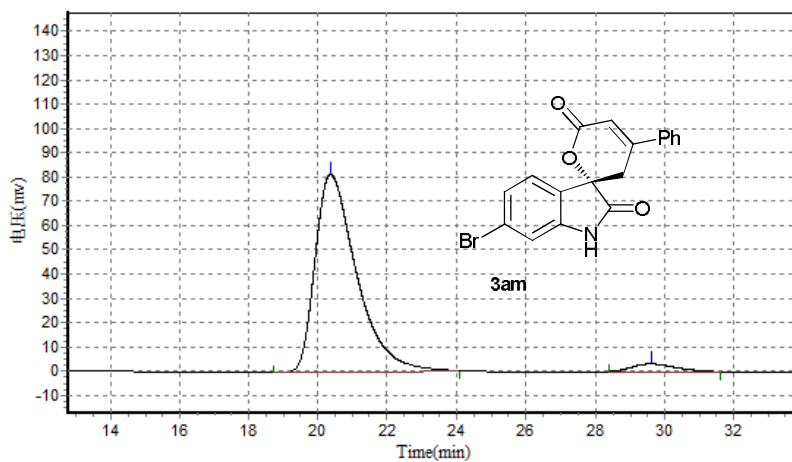

### Results

| Peak No.     | Peak ID | Ret Time | Height    | Area        | Conc.    |
|--------------|---------|----------|-----------|-------------|----------|
| 1            |         | 20.375   | 81386.898 | 6755831.000 | 95.9409  |
| 2            |         | 29.633   | 3226.972  | 285825.781  | 4.0591   |
| <b>Total</b> |         |          | 84613.871 | 7041656.781 | 100.0000 |

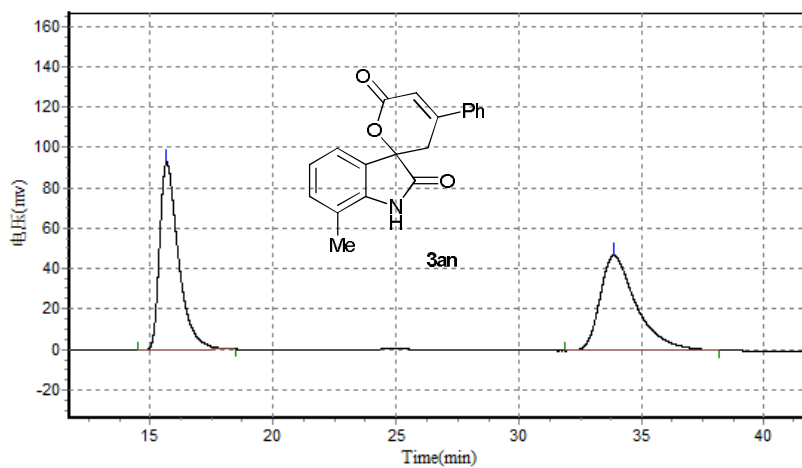

### Results

| Peak No.     | Peak ID | Ret Time | Height     | Area        | Conc.    |
|--------------|---------|----------|------------|-------------|----------|
| 1            |         | 15.675   | 92881.789  | 4958927.500 | 50.5899  |
| 2            |         | 33.872   | 47144.340  | 4843274.500 | 49.4101  |
| <b>Total</b> |         |          | 140026.129 | 9802202.000 | 100.0000 |

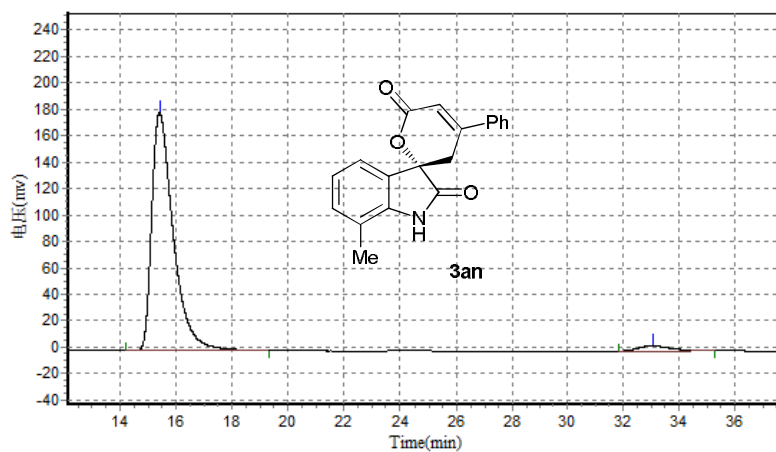

### Results

| Peak No.     | Peak ID | Ret Time | Height     | Area        | Conc.    |
|--------------|---------|----------|------------|-------------|----------|
| 1            |         | 15.420   | 180590.719 | 9653887.000 | 97.0255  |
| 2            |         | 33.033   | 3777.073   | 295957.063  | 2.9745   |
| <b>Total</b> |         |          | 184367.792 | 9949844.063 | 100.0000 |

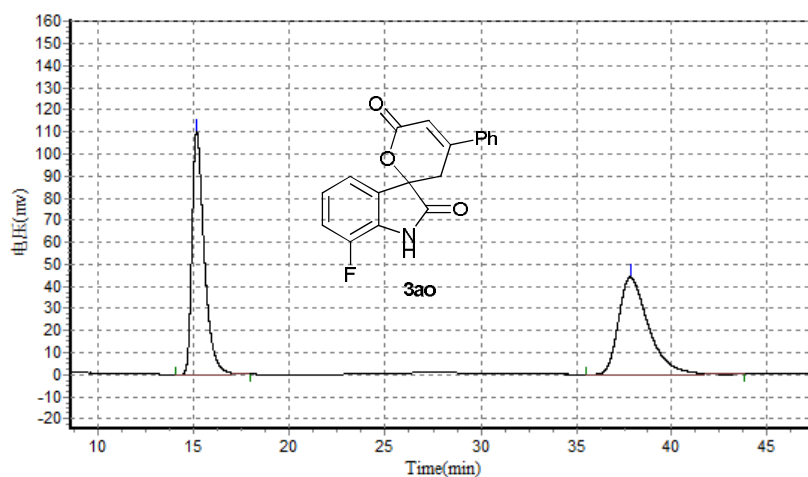

### Results

| Peak No.     | Peak ID | Ret Time | Height     | Area        | Conc.    |
|--------------|---------|----------|------------|-------------|----------|
| 1            |         | 15.148   | 110255.930 | 4907262.500 | 50.6830  |
| 2            |         | 37.823   | 44102.844  | 4775007.000 | 49.3170  |
| <b>Total</b> |         |          | 154358.773 | 9682269.500 | 100.0000 |

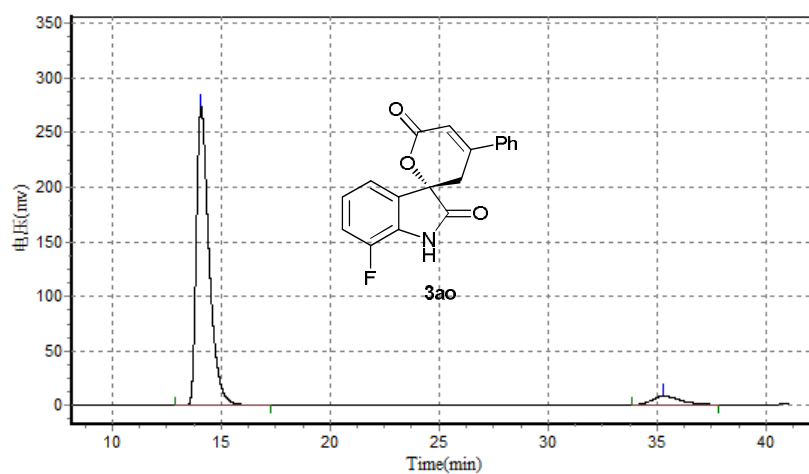

### Results

| Peak No.     | Peak ID | Ret Time | Height     | Area         | Conc.    |
|--------------|---------|----------|------------|--------------|----------|
| 1            |         | 14.065   | 274775.438 | 11203871.000 | 93.8684  |
| 2            |         | 35.317   | 7964.771   | 731844.500   | 6.1316   |
| <b>Total</b> |         |          | 282740.209 | 11935715.500 | 100.0000 |

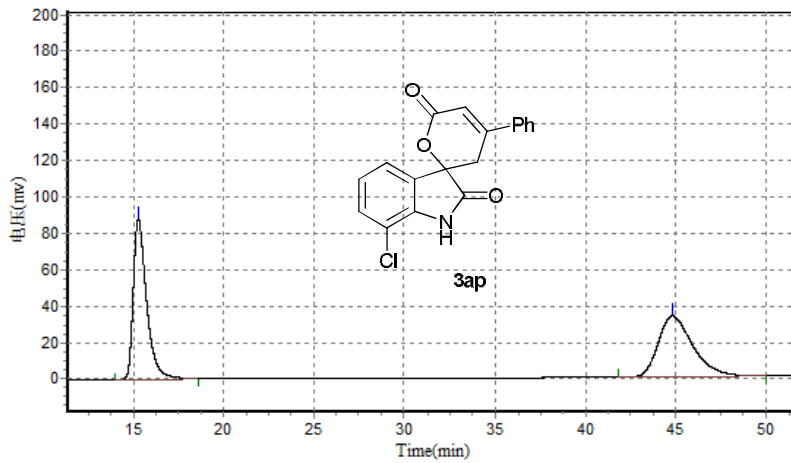

### Results

| Peak No.     | Peak ID | Ret Time | Height     | Area        | Conc.    |
|--------------|---------|----------|------------|-------------|----------|
| 1            |         | 15.255   | 87861.969  | 4469438.500 | 50.5265  |
| 2            |         | 44.823   | 33218.957  | 4376296.000 | 49.4735  |
| <b>Total</b> |         |          | 121080.926 | 8845734.500 | 100.0000 |

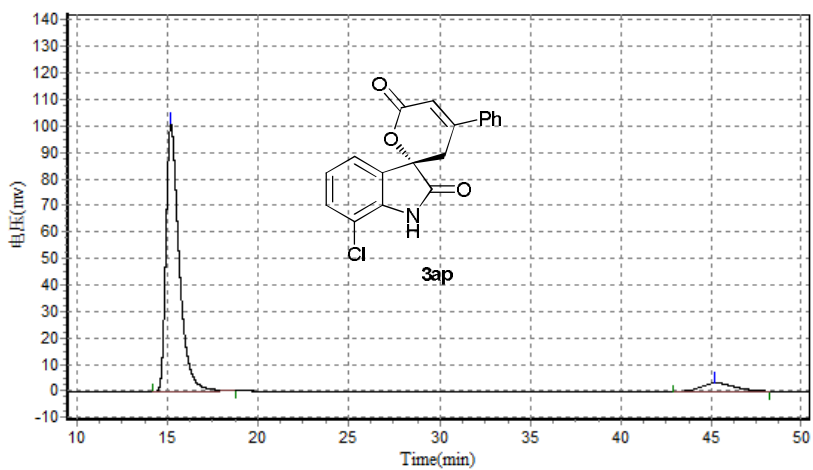

### Results

| Peak No.     | Peak ID | Ret Time | Height     | Area        | Conc.    |
|--------------|---------|----------|------------|-------------|----------|
| 1            |         | 15.188   | 100707.688 | 5102755.000 | 92.6228  |
| 2            |         | 45.237   | 3136.021   | 406420.188  | 7.3772   |
| <b>Total</b> |         |          | 103843.708 | 5509175.188 | 100.0000 |

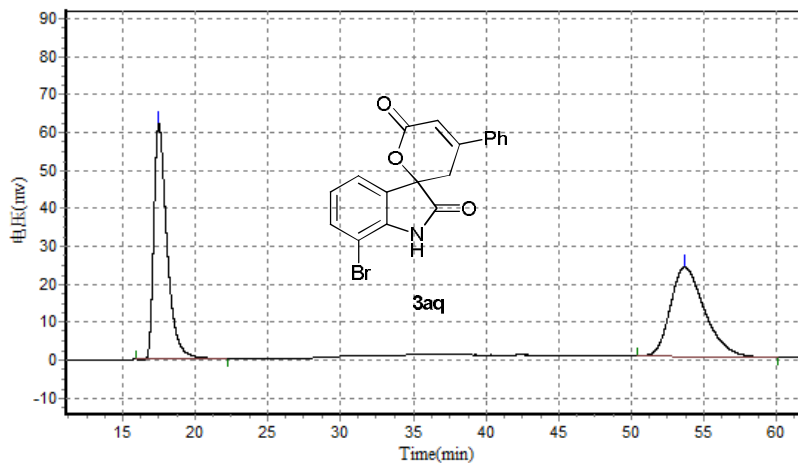

### Results

| Peak No.     | Peak ID | Ret Time | Height    | Area        | Conc.    |
|--------------|---------|----------|-----------|-------------|----------|
| 1            |         | 17.533   | 62238.250 | 3907139.750 | 50.7213  |
| 2            |         | 53.690   | 23353.363 | 3796013.000 | 49.2787  |
| <b>Total</b> |         |          | 85591.613 | 7703152.750 | 100.0000 |

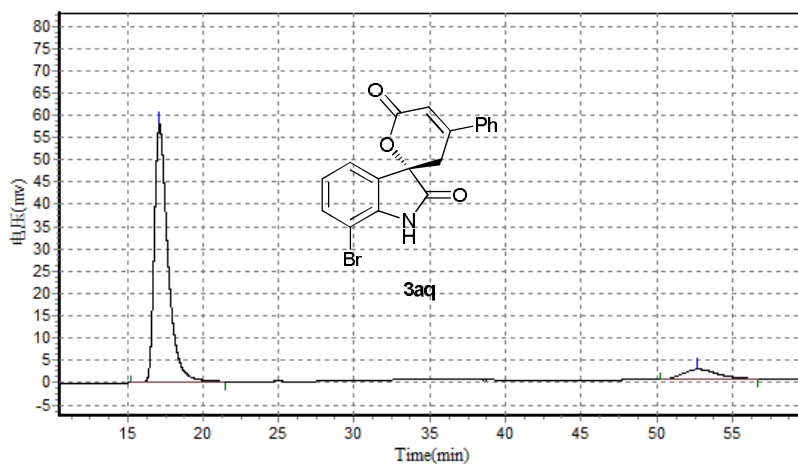

### Results

| Peak No.     | Peak ID | Ret Time | Height    | Area        | Conc.    |
|--------------|---------|----------|-----------|-------------|----------|
| 1            |         | 17.098   | 57754.734 | 3594863.500 | 90.8792  |
| 2            |         | 52.675   | 2225.175  | 360788.344  | 9.1208   |
| <b>Total</b> |         |          | 59979.909 | 3955651.844 | 100.0000 |

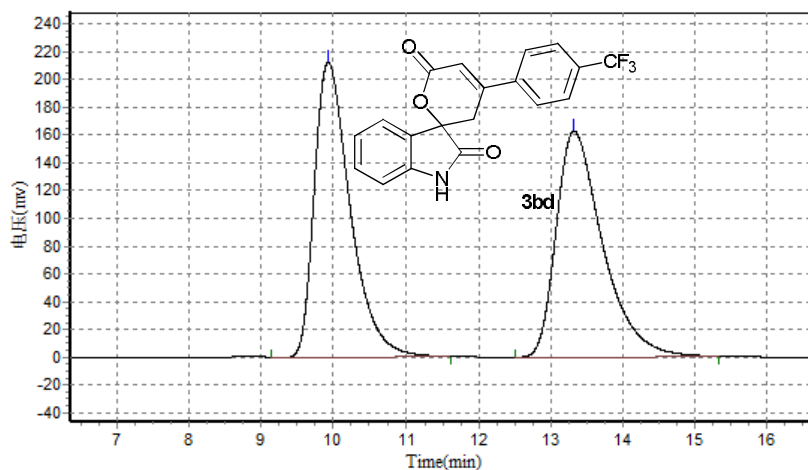

### Results

| Peak No.     | Peak ID | Ret Time | Height     | Area         | Conc.    |
|--------------|---------|----------|------------|--------------|----------|
| 1            |         | 9.927    | 211862.188 | 7327057.500  | 50.1551  |
| 2            |         | 13.330   | 162372.641 | 7281735.000  | 49.8449  |
| <b>Total</b> |         |          | 374234.828 | 14608792.500 | 100.0000 |

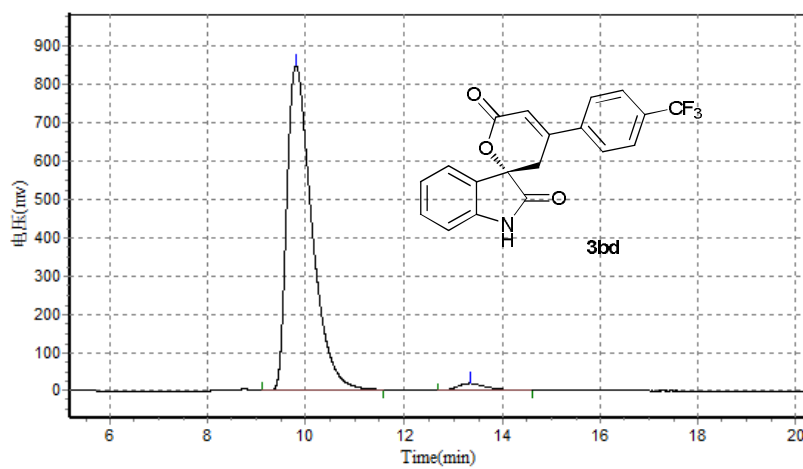

### Results

| Peak No.     | Peak ID | Ret Time | Height     | Area         | Conc.    |
|--------------|---------|----------|------------|--------------|----------|
| 1            |         | 9.802    | 846723.188 | 30064930.000 | 97.4088  |
| 2            |         | 13.335   | 18671.775  | 799778.500   | 2.5912   |
| <b>Total</b> |         |          | 865394.963 | 30864708.500 | 100.0000 |

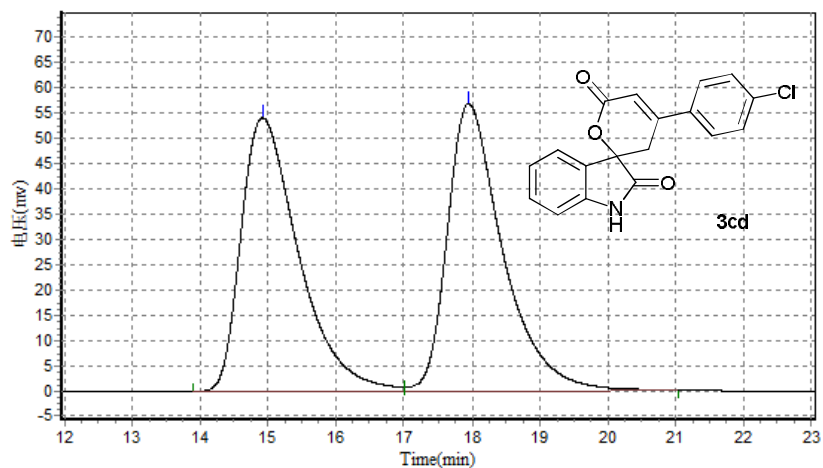

### Results

| Peak No.     | Peak ID | Ret Time | Height     | Area        | Conc.    |
|--------------|---------|----------|------------|-------------|----------|
| 1            |         | 14.915   | 54062.020  | 3183149.750 | 49.7358  |
| 2            |         | 17.938   | 56769.484  | 3216965.250 | 50.2642  |
| <b>Total</b> |         |          | 110831.504 | 6400115.000 | 100.0000 |

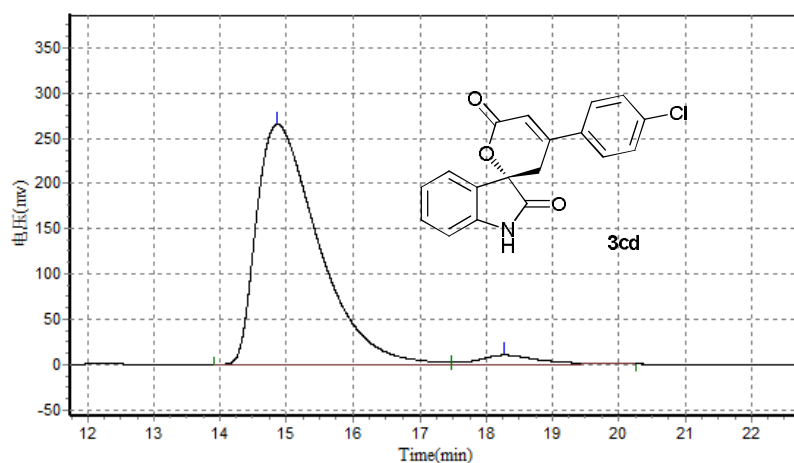

### Results

| Peak No.     | Peak ID | Ret Time | Height     | Area         | Conc.    |
|--------------|---------|----------|------------|--------------|----------|
| 1            |         | 14.865   | 265343.313 | 17229668.000 | 96.5428  |
| 2            |         | 18.268   | 9947.638   | 617001.000   | 3.4572   |
| <b>Total</b> |         |          | 275290.950 | 17846669.000 | 100.0000 |



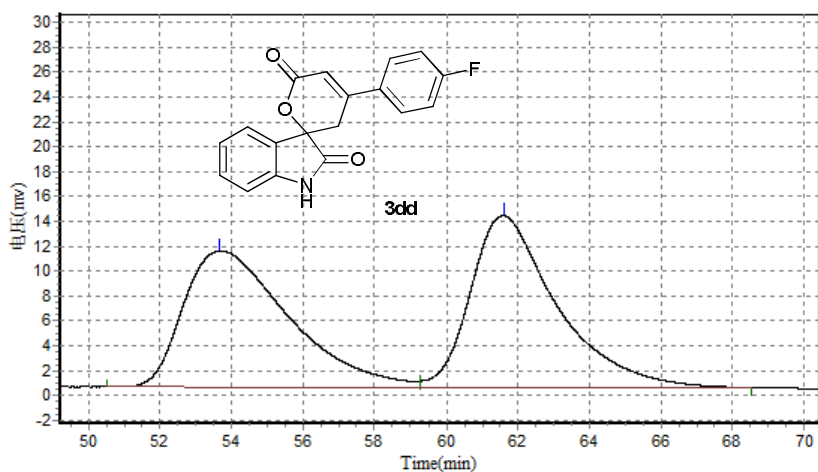

### Results

| Peak No.     | Peak ID | Ret Time | Height    | Area        | Conc.    |
|--------------|---------|----------|-----------|-------------|----------|
| 1            |         | 53.673   | 10972.609 | 2240754.750 | 49.0582  |
| 2            |         | 61.603   | 13818.933 | 2326787.250 | 50.9418  |
| <b>Total</b> |         |          | 24791.542 | 4567542.000 | 100.0000 |

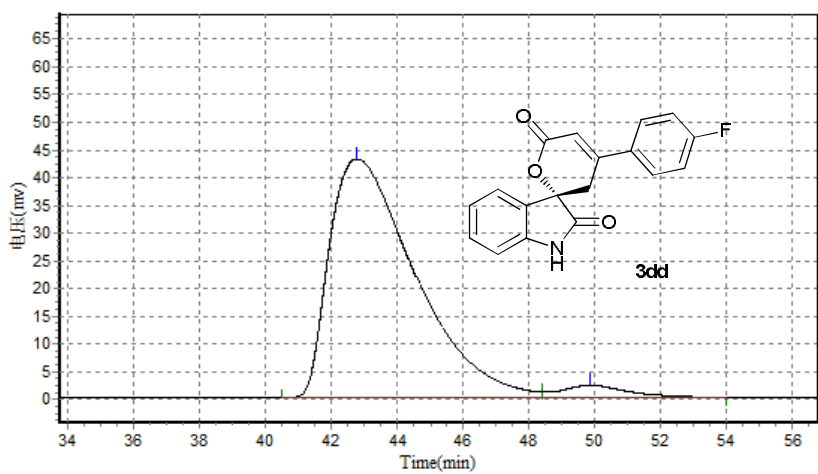

### Results

| Peak No.     | Peak ID | Ret Time | Height    | Area        | Conc.    |
|--------------|---------|----------|-----------|-------------|----------|
| 1            |         | 42.795   | 43033.180 | 7750841.500 | 96.1608  |
| 2            |         | 49.848   | 2221.133  | 309447.563  | 3.8392   |
| <b>Total</b> |         |          | 45254.313 | 8060289.063 | 100.0000 |

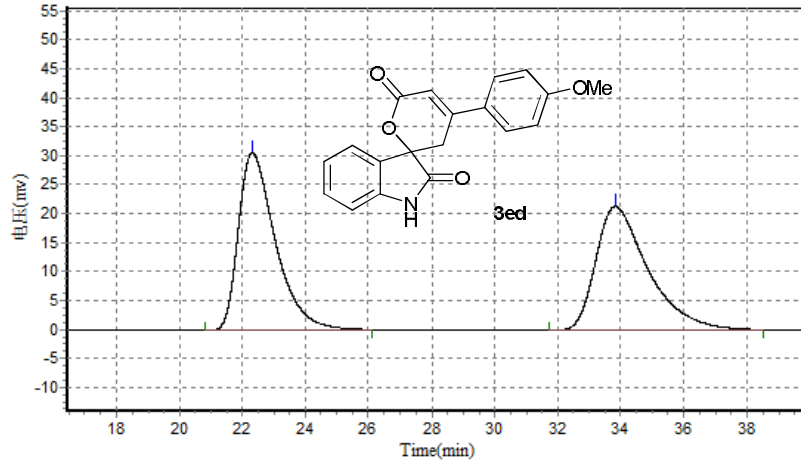

### Results

| Peak No.     | Peak ID | Ret Time | Height    | Area        | Conc.    |
|--------------|---------|----------|-----------|-------------|----------|
| 1            |         | 22.315   | 30562.031 | 2499027.500 | 50.2270  |
| 2            |         | 33.835   | 21389.068 | 2476439.000 | 49.7730  |
| <b>Total</b> |         |          | 51951.100 | 4975466.500 | 100.0000 |

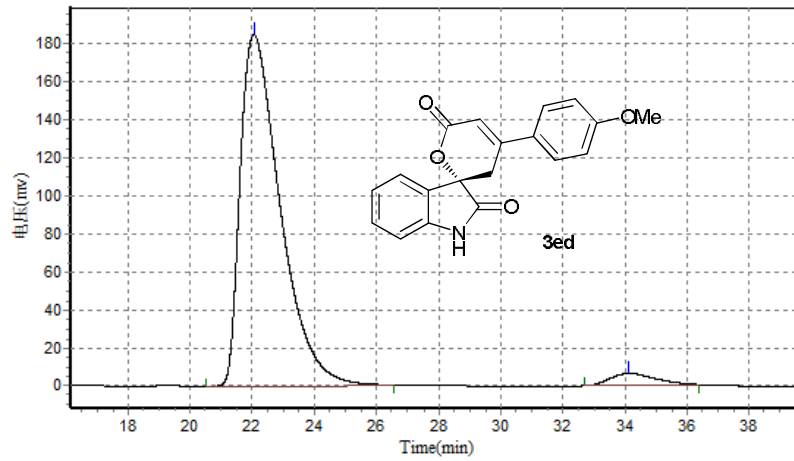

### Results

| Peak No.     | Peak ID | Ret Time | Height     | Area         | Conc.    |
|--------------|---------|----------|------------|--------------|----------|
| 1            |         | 22.053   | 184507.109 | 16559878.000 | 96.3107  |
| 2            |         | 34.137   | 6226.667   | 634341.438   | 3.6893   |
| <b>Total</b> |         |          | 190733.776 | 17194219.438 | 100.0000 |

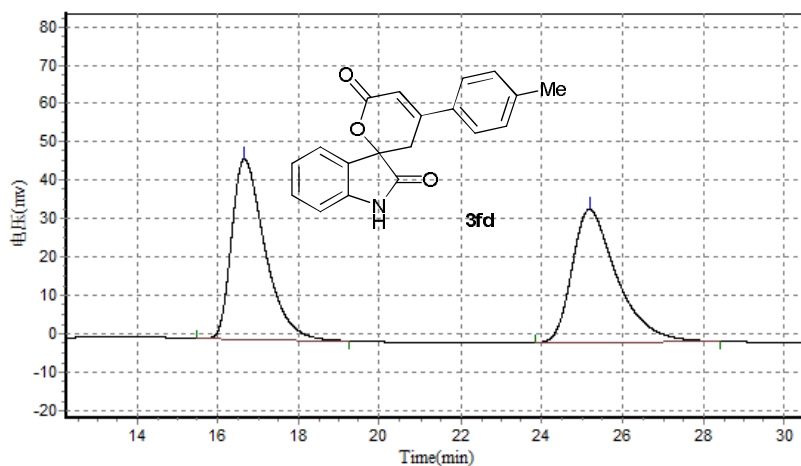

### Results

| Peak No.     | Peak ID | Ret Time | Height    | Area        | Conc.    |
|--------------|---------|----------|-----------|-------------|----------|
| 1            |         | 16.657   | 46989.043 | 2688806.000 | 50.1241  |
| 2            |         | 25.177   | 34604.715 | 2675492.750 | 49.8759  |
| <b>Total</b> |         |          | 81593.758 | 5364298.750 | 100.0000 |

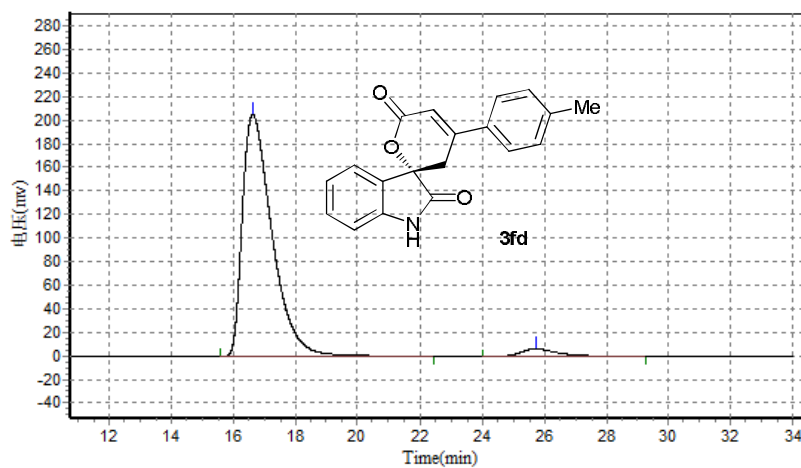

### Results

| Peak No.     | Peak ID | Ret Time | Height     | Area         | Conc.    |
|--------------|---------|----------|------------|--------------|----------|
| 1            |         | 16.632   | 204797.734 | 13655593.000 | 96.3905  |
| 2            |         | 25.732   | 6168.125   | 511351.031   | 3.6095   |
| <b>Total</b> |         |          | 210965.859 | 14166944.031 | 100.0000 |

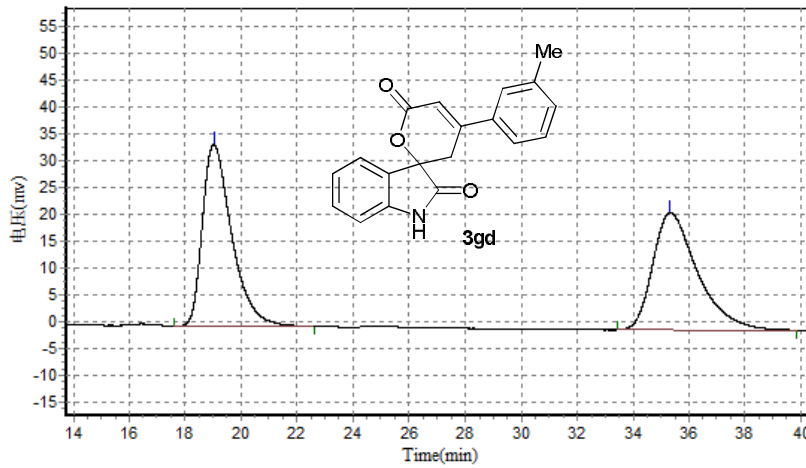

### Results

| Peak No.     | Peak ID | Ret Time | Height    | Area        | Conc.    |
|--------------|---------|----------|-----------|-------------|----------|
| 1            |         | 19.023   | 34024.535 | 2471100.000 | 50.3623  |
| 2            |         | 35.320   | 21879.656 | 2435549.750 | 49.6377  |
| <b>Total</b> |         |          | 55904.191 | 4906649.750 | 100.0000 |

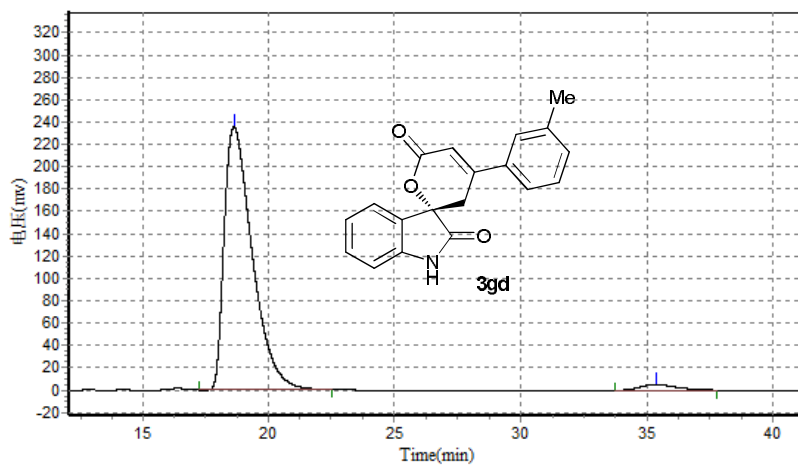

### Results

| Peak No.     | Peak ID | Ret Time | Height     | Area         | Conc.    |
|--------------|---------|----------|------------|--------------|----------|
| 1            |         | 18.608   | 235680.531 | 18345082.000 | 97.2656  |
| 2            |         | 35.375   | 5020.489   | 515726.750   | 2.7344   |
| <b>Total</b> |         |          | 240701.020 | 18860808.750 | 100.0000 |

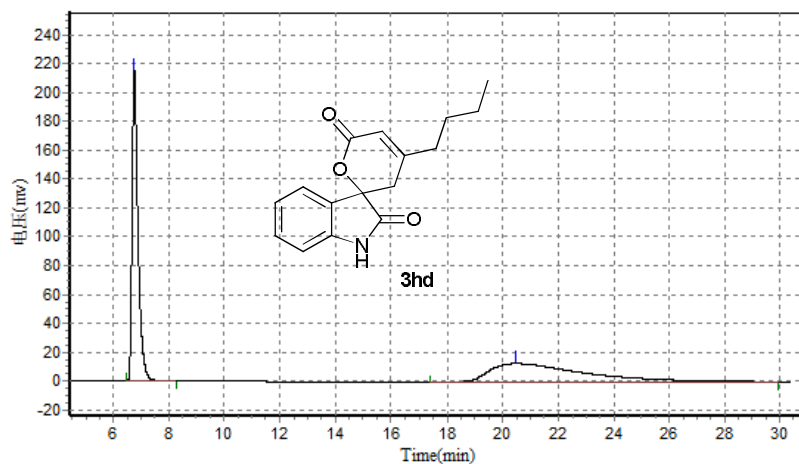

### Results

| Peak No.     | Peak ID | Ret Time | Height     | Area        | Conc.    |
|--------------|---------|----------|------------|-------------|----------|
| 1            |         | 6.763    | 215936.344 | 3214875.500 | 52.6582  |
| 2            |         | 20.450   | 12538.112  | 2890299.500 | 47.3418  |
| <b>Total</b> |         |          | 228474.456 | 6105175.000 | 100.0000 |

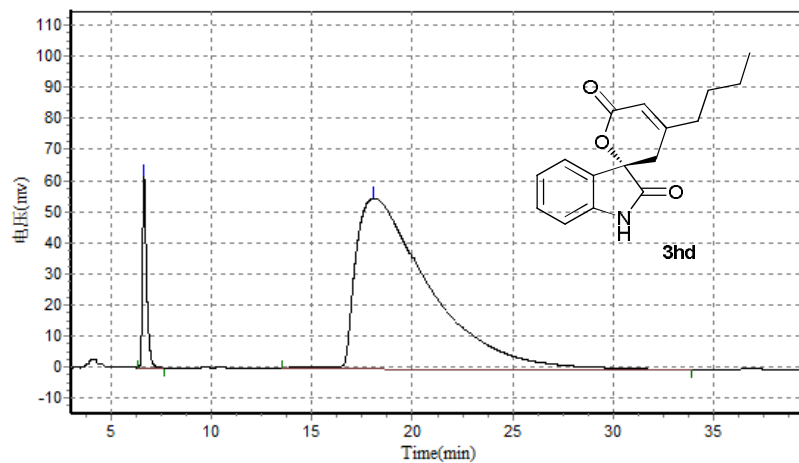

### Results

| Peak No.     | Peak ID | Ret Time | Height     | Area         | Conc.    |
|--------------|---------|----------|------------|--------------|----------|
| 1            |         | 6.652    | 61564.234  | 872776.813   | 5.9339   |
| 2            |         | 18.097   | 54813.113  | 13835417.000 | 94.0660  |
| <b>Total</b> |         |          | 116377.348 | 14708193.813 | 100.0000 |
